# Supplementary material for: Reaction of Picolinamides with Ketones Producing a New Type of Heterocyclic Salts with an Imidazolidin-4-One Ring
Source: MDPI journal article supplement (doi:10.3390/molecules29010206), 2023-12-29

## Supporting Information

### Reaction of Picolinamides With Ketones Producing a New Type of Heterocyclic Salts With a Imidazolidin-4-one Ring

*Eugene P. Kramarova<sup>1</sup>, Dmitri N. Lyakhmun<sup>1</sup>, Dmitry V. Tarasenko<sup>1</sup>, Sophia S. Borisevich<sup>2</sup>, Edward M. Khamitov<sup>2</sup>, Alfia R. Yusupova<sup>2</sup>, Alexander A. Korlyukov<sup>1,3</sup>, Alexander R. Romanenko<sup>3,4</sup>, Tatiana A. Shmigol<sup>1</sup>, Yuri I. Baukov<sup>1</sup> and Vadim V. Negrebetsky<sup>\*1</sup>*

<sup>1</sup> Department of Medicinal Chemistry and Toxicology, Pirogov Russian National Research Medical University, 117997 Moscow, Russia

<sup>2</sup> Ufa Institute of Chemistry UFRS RAS, pr. Oktyabrya 71, 450054 Ufa, Russia

<sup>3</sup> A.N.Nesmeyanov Institute of Organoelement Compounds of Russian Academy of Sciences (INEOS RAS), Russia, 119334, Moscow, Vavilova St. 28, bld. 1

<sup>4</sup> Federal State Budgetary Educational Institution of Higher Education "Russian University of Chemical Technology named after D.I. Mendeleev", 125047, Moscow, Miusskaya square, 9

#### A Table of Contents

|                                                                                                                                                                             |    |
|-----------------------------------------------------------------------------------------------------------------------------------------------------------------------------|----|
| <b>Figure S1. Molecular dynamics box with a system containing ortho-pyridinecarboxamide-1,2 (black), sulfonate (blue), acetone (red) and methanol (blue).</b> .....         | 2  |
| <b>Table S1. The enthalpy (<math>\Delta_r H^\circ</math>) and Gibbs free energy (<math>\Delta_r G^\circ</math>) of the reaction of formation of oxysulfonic acids</b> ..... | 3  |
| <b>Figure S2. Proton migration transition state</b> .....                                                                                                                   | 3  |
| <b>S1. XYZ coordinates of the stationary points of 2a-f products; calculation by the M052X-D3/TZVP + IEFPCM approximation</b> .....                                         | 5  |
| <b>Table S2. The enthalpy (<math>\Delta_r H^\circ</math>) and Gibbs free energy (<math>\Delta_r G^\circ</math>) of the formation reaction of salt 2a-2g</b> .....           | 11 |
| <b>S2. XYZ coordinates of the stationary points of 3a-i products; calculation by the M052X-D3/TZVP + IEFPCM approximation</b> .....                                         | 12 |
| <b>Table S3. The enthalpy (<math>\Delta_r H^\circ</math>) and Gibbs free energy (<math>\Delta_r G^\circ</math>) of the formation reaction of salt 3a-3k</b> .....           | 26 |
| <b>Table S4. <sup>13</sup>C NMR chemical shifts (theoretical calculations).</b> .....                                                                                       | 27 |
| <b><sup>1</sup>H, <sup>13</sup>C NMR experimental data</b> .....                                                                                                            | 33 |
| <b>X-ray diffraction data</b> .....                                                                                                                                         | 67 |

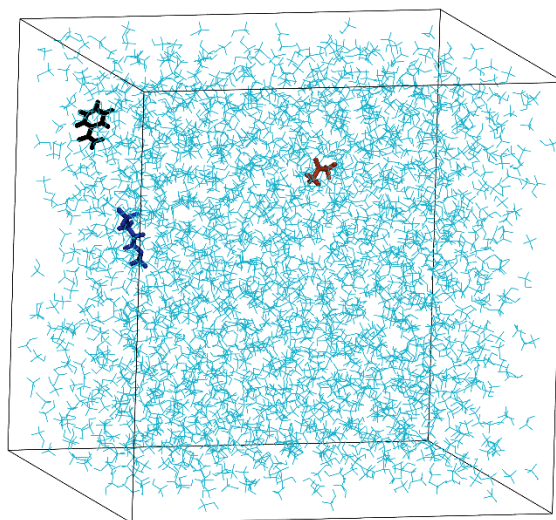

**Figure S1. Molecular dynamics box with a system containing ortho-pyridinecarboxamide-1,2 (black), sulfonate (blue), acetone (red) and methanol (blue). Cube verge is equal to 5.285 nm**

**Table S1.** The enthalpy ( $\Delta_r H^\circ$ ) and Gibbs free energy ( $\Delta_r G^\circ$ ) of the reaction of formation of oxysulfonic acids

| Product ID    | Reagent structure      | Product structure                 | $\Delta_r H^\circ$ , kJ/mol | $\Delta_r G^\circ$ , kJ/mol |
|---------------|------------------------|-----------------------------------|-----------------------------|-----------------------------|
| <b>1-IIa</b>  | <chem>CH3-OH</chem>    | <chem>CH3O(CH2)3SO3H</chem>       | -28.6                       | 11.2                        |
| <b>1-IIb</b>  | <chem>C2H5-OH</chem>   | <chem>C2H5O(CH2)3SO3H</chem>      | -26.5                       | 16.7                        |
| <b>1-IIc</b>  | <chem>CC(C)CO</chem>   | <chem>CC(C)CO(CH2)3SO3H</chem>    | -25.6                       | 14.8                        |
| <b>1-IIId</b> | <chem>CC(C)CCO</chem>  | <chem>CC(C)CCO(CH2)3SO3H</chem>   | -31.9                       | 11.3                        |
| <b>1-IIe</b>  | <chem>CC(C)(C)O</chem> | <chem>CC(C)(C)CO(CH2)3SO3H</chem> | -22.2                       | 17.4                        |
| <b>1-IIIf</b> | <chem>C1CCCCC1O</chem> | <chem>C1CCCCC1O(CH2)3SO3H</chem>  | -21.6                       | 17.9                        |

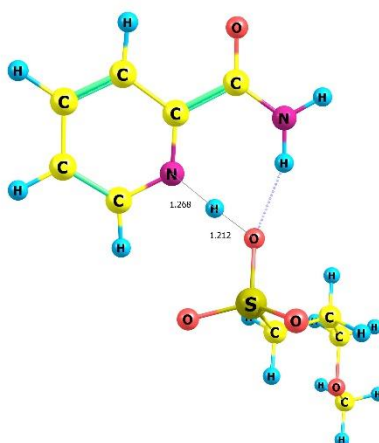

**Figure S2.** Proton migration transition state

**Table S2. AIM analysis results**

|                                                                                    |                                |             |
|------------------------------------------------------------------------------------|--------------------------------|-------------|
| 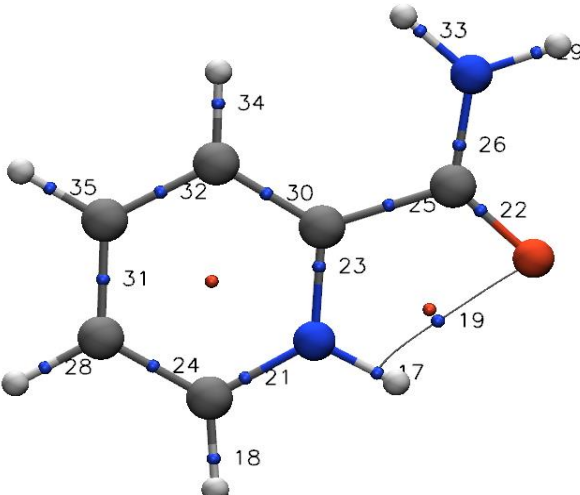  | <b>CP19, Type (3,-1)</b>       |             |
|                                                                                    | Density of all electrons:      | 0.023548    |
|                                                                                    | Connected atoms:               | 8(O)—1(N)   |
|                                                                                    | Neutral Binding Energy, kJ/mol | -18.87      |
|                                                                                    | Charged Binding Energy, kJ/mol | -37.20      |
|  | <b>CP68, Type (3,-1)</b>       |             |
|                                                                                    | Density of all electrons:      | 0.013222    |
|                                                                                    | Connected atoms:               | 25(O)—14(H) |
|                                                                                    | Neutral Binding Energy, kJ/mol | -9.24       |
|                                                                                    | Charged Binding Energy, kJ/mol | -22.85      |
|                                                                                    | <b>CP54, Type (3,-1)</b>       |             |
|                                                                                    | Density of all electrons:      | 0.062928    |
|                                                                                    | Connected atoms:               | 24(O)—7(H)  |
|                                                                                    | Neutral Binding Energy, kJ/mol | -55.63      |
|                                                                                    | Charged Binding Energy, kJ/mol | -91.96      |
|                                                                                    | <b>CP42, Type (3,-1)</b>       |             |
|                                                                                    | Density of all electrons:      | 0.031711    |
|                                                                                    | Connected atoms:               | 16(H)—24(O) |
|                                                                                    | Neutral Binding Energy, kJ/mol | -26.49      |
|                                                                                    | Charged Binding Energy, kJ/mol | -48.56      |

**S1. XYZ coordinates of the stationary points of 2a-f products; calculation by the M052X-D3/TZVP + IEFPCM approximation.**

**2a**

**Solvent=Methanol**

|    |              |              |              |
|----|--------------|--------------|--------------|
| 7  | 2.330931000  | 0.468397000  | -0.263583000 |
| 6  | 3.384064000  | -0.379191000 | -0.238018000 |
| 6  | 4.666036000  | 0.142566000  | -0.355718000 |
| 6  | 4.841050000  | 1.520738000  | -0.488698000 |
| 6  | 3.729380000  | 2.363537000  | -0.497987000 |
| 6  | 2.466753000  | 1.801023000  | -0.381311000 |
| 1  | 1.330844000  | 0.106274000  | -0.200641000 |
| 6  | 3.208935000  | -1.880897000 | -0.073139000 |
| 8  | 4.210017000  | -2.591284000 | -0.167467000 |
| 7  | 1.974363000  | -2.347195000 | 0.186009000  |
| 1  | 5.500271000  | -0.545943000 | -0.337293000 |
| 1  | 5.839959000  | 1.932882000  | -0.579166000 |
| 1  | 3.831394000  | 3.437247000  | -0.592082000 |
| 1  | 1.540183000  | 2.361299000  | -0.356549000 |
| 1  | 1.886609000  | -3.348587000 | 0.286309000  |
| 1  | 1.127277000  | -1.780343000 | 0.248187000  |
| 6  | -6.715109000 | 0.251016000  | -0.711788000 |
| 8  | -5.438934000 | 0.057055000  | -0.126796000 |
| 6  | -4.587267000 | -0.752328000 | -0.925682000 |
| 6  | -3.233053000 | -0.852485000 | -0.236229000 |
| 6  | -2.570383000 | 0.516574000  | -0.096252000 |
| 16 | -0.991098000 | 0.441303000  | 0.774682000  |
| 8  | -1.240645000 | -0.141569000 | 2.114281000  |
| 8  | -0.135672000 | -0.479003000 | -0.103957000 |
| 8  | -0.431243000 | 1.820952000  | 0.774299000  |
| 1  | -7.245898000 | -0.702356000 | -0.857396000 |
| 1  | -7.295124000 | 0.877760000  | -0.030125000 |
| 1  | -6.643657000 | 0.756671000  | -1.687017000 |
| 1  | -5.020075000 | -1.757727000 | -1.054043000 |
| 1  | -4.474525000 | -0.313502000 | -1.931749000 |
| 1  | -3.365262000 | -1.295717000 | 0.755954000  |
| 1  | -2.584834000 | -1.518904000 | -0.813743000 |
| 1  | -2.356918000 | 0.966094000  | -1.070176000 |
| 1  | -3.200348000 | 1.203073000  | 0.473706000  |

**2b**

**Solvent=Ethanol**

|   |              |              |              |
|---|--------------|--------------|--------------|
| 7 | -2.735428000 | -0.441999000 | -0.285746000 |
| 6 | -3.771034000 | 0.427138000  | -0.273070000 |
| 6 | -5.060012000 | -0.065132000 | -0.434011000 |
| 6 | -5.259982000 | -1.436696000 | -0.596719000 |
| 6 | -4.166155000 | -2.302534000 | -0.591917000 |
| 6 | -2.895722000 | -1.769110000 | -0.431253000 |
| 1 | -1.728868000 | -0.102264000 | -0.190412000 |
| 6 | -3.569233000 | 1.921894000  | -0.077343000 |

|    |              |              |              |
|----|--------------|--------------|--------------|
| 8  | -4.552821000 | 2.654604000  | -0.183719000 |
| 7  | -2.332112000 | 2.357555000  | 0.220199000  |
| 1  | -5.879888000 | 0.640611000  | -0.425214000 |
| 1  | -6.264473000 | -1.825773000 | -0.721467000 |
| 1  | -4.287743000 | -3.372024000 | -0.708369000 |
| 1  | -1.981848000 | -2.349188000 | -0.391812000 |
| 1  | -2.226484000 | 3.354953000  | 0.340953000  |
| 1  | -1.498597000 | 1.772002000  | 0.292686000  |
| 8  | 5.029077000  | -0.187539000 | 0.044518000  |
| 6  | 4.219341000  | 0.656654000  | -0.764573000 |
| 6  | 2.848400000  | 0.767501000  | -0.108732000 |
| 6  | 2.157818000  | -0.591283000 | -0.014329000 |
| 16 | 0.562410000  | -0.505705000 | 0.824784000  |
| 8  | 0.793716000  | 0.045188000  | 2.180943000  |
| 8  | -0.257867000 | 0.448242000  | -0.052454000 |
| 8  | -0.022940000 | -1.874108000 | 0.783205000  |
| 1  | 4.661269000  | 1.658711000  | -0.863813000 |
| 1  | 4.125631000  | 0.235809000  | -1.779917000 |
| 1  | 2.962555000  | 1.186869000  | 0.896049000  |
| 1  | 2.227998000  | 1.458904000  | -0.687515000 |
| 1  | 1.957227000  | -1.015068000 | -1.002447000 |
| 1  | 2.764092000  | -1.300904000 | 0.552924000  |
| 6  | 6.264276000  | -0.575796000 | -0.553203000 |
| 1  | 6.645708000  | -1.387843000 | 0.074529000  |
| 1  | 6.081939000  | -0.990702000 | -1.557706000 |
| 6  | 7.289001000  | 0.554023000  | -0.624913000 |
| 1  | 7.453018000  | 0.981580000  | 0.369098000  |
| 1  | 6.965255000  | 1.355131000  | -1.295982000 |
| 1  | 8.243912000  | 0.170517000  | -0.998858000 |

## 2c

### Solvent=2-Propanol

|   |              |              |              |
|---|--------------|--------------|--------------|
| 7 | -3.054421000 | -0.475709000 | -0.294585000 |
| 6 | -4.128701000 | 0.343547000  | -0.243845000 |
| 6 | -5.396658000 | -0.205056000 | -0.388997000 |
| 6 | -5.536242000 | -1.581242000 | -0.574027000 |
| 6 | -4.403630000 | -2.395157000 | -0.607184000 |
| 6 | -3.156125000 | -1.806010000 | -0.462064000 |
| 1 | -2.062548000 | -0.090833000 | -0.212707000 |
| 6 | -3.992614000 | 1.841852000  | -0.020118000 |
| 8 | -5.011076000 | 2.529572000  | -0.092412000 |
| 7 | -2.771400000 | 2.328309000  | 0.264243000  |
| 1 | -6.247767000 | 0.461663000  | -0.349927000 |
| 1 | -6.524095000 | -2.014354000 | -0.686006000 |
| 1 | -4.478131000 | -3.466947000 | -0.741110000 |
| 1 | -2.215688000 | -2.343275000 | -0.451530000 |
| 1 | -2.709964000 | 3.326776000  | 0.405005000  |
| 1 | -1.910066000 | 1.781048000  | 0.307176000  |
| 8 | 4.690228000  | 0.128593000  | 0.001361000  |
| 6 | 3.850897000  | 0.946676000  | -0.801986000 |
| 6 | 2.473422000  | 0.990028000  | -0.150521000 |
| 6 | 1.845825000  | -0.400033000 | -0.075591000 |

|    |              |              |              |
|----|--------------|--------------|--------------|
| 16 | 0.251835000  | -0.403422000 | 0.770043000  |
| 8  | 0.461385000  | 0.136736000  | 2.133829000  |
| 8  | -0.617255000 | 0.523874000  | -0.089468000 |
| 8  | -0.268140000 | -1.797236000 | 0.707988000  |
| 1  | 4.249653000  | 1.968058000  | -0.887762000 |
| 1  | 3.778292000  | 0.534814000  | -1.822527000 |
| 1  | 2.566297000  | 1.400672000  | 0.860050000  |
| 1  | 1.824296000  | 1.660496000  | -0.722393000 |
| 1  | 1.661365000  | -0.817229000 | -1.069641000 |
| 1  | 2.487551000  | -1.088839000 | 0.478165000  |
| 6  | 5.932007000  | -0.257786000 | -0.600449000 |
| 1  | 5.728370000  | -0.637814000 | -1.616022000 |
| 6  | 6.479899000  | -1.391660000 | 0.257769000  |
| 6  | 6.906125000  | 0.918587000  | -0.694661000 |
| 1  | 6.515041000  | 1.719014000  | -1.329159000 |
| 1  | 7.094237000  | 1.328740000  | 0.303232000  |
| 1  | 7.859433000  | 0.590359000  | -1.120687000 |
| 1  | 6.674201000  | -1.034479000 | 1.274565000  |
| 1  | 7.415951000  | -1.774167000 | -0.159539000 |
| 1  | 5.758591000  | -2.211918000 | 0.312165000  |

## 2d

### Solvent=2-Methyl-1-Propanol

|    |              |              |              |
|----|--------------|--------------|--------------|
| 7  | 3.344435000  | 0.539725000  | -0.238077000 |
| 6  | 4.465655000  | -0.211655000 | -0.161172000 |
| 6  | 5.701069000  | 0.419642000  | -0.233372000 |
| 6  | 5.760170000  | 1.806960000  | -0.372855000 |
| 6  | 4.580230000  | 2.548860000  | -0.434163000 |
| 6  | 3.367964000  | 1.878331000  | -0.362996000 |
| 1  | 2.375845000  | 0.091029000  | -0.212554000 |
| 6  | 4.416376000  | -1.721616000 | 0.016305000  |
| 8  | 5.479277000  | -2.341061000 | -0.026911000 |
| 7  | 3.217603000  | -2.292008000 | 0.232136000  |
| 1  | 6.590447000  | -0.193485000 | -0.174277000 |
| 1  | 6.722293000  | 2.304345000  | -0.427600000 |
| 1  | 4.591759000  | 3.626912000  | -0.533710000 |
| 1  | 2.395516000  | 2.354949000  | -0.380047000 |
| 1  | 3.214255000  | -3.296065000 | 0.343516000  |
| 1  | 2.321601000  | -1.801782000 | 0.246961000  |
| 8  | -4.339424000 | -0.516442000 | -0.443445000 |
| 6  | -3.392704000 | -1.271747000 | -1.181345000 |
| 6  | -2.073602000 | -1.258441000 | -0.420101000 |
| 6  | -1.537939000 | 0.162140000  | -0.253006000 |
| 16 | 0.008682000  | 0.218661000  | 0.675686000  |
| 8  | -0.235197000 | -0.396791000 | 2.000970000  |
| 8  | 0.973160000  | -0.616029000 | -0.177767000 |
| 8  | 0.446597000  | 1.641327000  | 0.701542000  |
| 1  | -3.742189000 | -2.308623000 | -1.313283000 |
| 1  | -3.259184000 | -0.840792000 | -2.188342000 |
| 1  | -2.221548000 | -1.708297000 | 0.566671000  |
| 1  | -1.341178000 | -1.868916000 | -0.957518000 |
| 1  | -1.327790000 | 0.633580000  | -1.217305000 |

|   |              |              |              |
|---|--------------|--------------|--------------|
| 1 | -2.246090000 | 0.788536000  | 0.293870000  |
| 6 | -5.604973000 | -0.410293000 | -1.083038000 |
| 1 | -5.487009000 | 0.050803000  | -2.078249000 |
| 1 | -6.037071000 | -1.413990000 | -1.234231000 |
| 6 | -6.532576000 | 0.440333000  | -0.213395000 |
| 1 | -7.490132000 | 0.489402000  | -0.751099000 |
| 6 | -5.989728000 | 1.867704000  | -0.056675000 |
| 6 | -6.773843000 | -0.221448000 | 1.150487000  |
| 1 | -7.200527000 | -1.224035000 | 1.034996000  |
| 1 | -5.831717000 | -0.317860000 | 1.698609000  |
| 1 | -7.464128000 | 0.372683000  | 1.758162000  |
| 1 | -5.021710000 | 1.854125000  | 0.453505000  |
| 1 | -6.676474000 | 2.485828000  | 0.530751000  |
| 1 | -5.850045000 | 2.348426000  | -1.031349000 |

**2e**

**Solvent=2-Methyl-2-Propanol**

|    |              |              |              |
|----|--------------|--------------|--------------|
| 7  | -3.306653000 | -0.504861000 | -0.278788000 |
| 6  | -4.394294000 | 0.297652000  | -0.288439000 |
| 6  | -5.652374000 | -0.280186000 | -0.404608000 |
| 6  | -5.768157000 | -1.667690000 | -0.498976000 |
| 6  | -4.622187000 | -2.463045000 | -0.471357000 |
| 6  | -3.385544000 | -1.844761000 | -0.358091000 |
| 1  | -2.319603000 | -0.098830000 | -0.214195000 |
| 6  | -4.283851000 | 1.809596000  | -0.162313000 |
| 8  | -5.312051000 | 2.474163000  | -0.289663000 |
| 7  | -3.073205000 | 2.332740000  | 0.101684000  |
| 1  | -6.514189000 | 0.373804000  | -0.414633000 |
| 1  | -6.748078000 | -2.123742000 | -0.587768000 |
| 1  | -4.678335000 | -3.542510000 | -0.533940000 |
| 1  | -2.436526000 | -2.364263000 | -0.304940000 |
| 1  | -3.029121000 | 3.338991000  | 0.179089000  |
| 1  | -2.204193000 | 1.802843000  | 0.190263000  |
| 8  | 4.410300000  | 0.308716000  | 0.202267000  |
| 6  | 3.584773000  | 1.038288000  | -0.696275000 |
| 6  | 2.184982000  | 1.088772000  | -0.093057000 |
| 6  | 1.590178000  | -0.310337000 | 0.048903000  |
| 16 | -0.032072000 | -0.304208000 | 0.838116000  |
| 8  | 0.112828000  | 0.331919000  | 2.167941000  |
| 8  | -0.893493000 | 0.539841000  | -0.112589000 |
| 8  | -0.515082000 | -1.712436000 | 0.850303000  |
| 1  | 3.963628000  | 2.060708000  | -0.837799000 |
| 1  | 3.544565000  | 0.562501000  | -1.686743000 |
| 1  | 2.234254000  | 1.562234000  | 0.892684000  |
| 1  | 1.539054000  | 1.705174000  | -0.726278000 |
| 1  | 1.452337000  | -0.794953000 | -0.921907000 |
| 1  | 2.230075000  | -0.943543000 | 0.667259000  |
| 6  | 5.683362000  | -0.175477000 | -0.282973000 |
| 6  | 5.468975000  | -1.318705000 | -1.286402000 |
| 6  | 6.369324000  | -0.702179000 | 0.980202000  |
| 1  | 6.506142000  | 0.108273000  | 1.702093000  |
| 1  | 5.754570000  | -1.478056000 | 1.446268000  |



|   |             |              |              |
|---|-------------|--------------|--------------|
| 1 | 7.347860000 | -1.128554000 | 0.741133000  |
| 1 | 4.847762000 | -2.099536000 | -0.837568000 |
| 1 | 6.429378000 | -1.758796000 | -1.571891000 |
| 1 | 4.980719000 | -0.971258000 | -2.201518000 |
| 6 | 6.506839000 | 0.960236000  | -0.905732000 |
| 1 | 6.590520000 | 1.796183000  | -0.204340000 |
| 1 | 7.514300000 | 0.606994000  | -1.145033000 |
| 1 | 6.054880000 | 1.327905000  | -1.831734000 |

**2f**

**Solvent=1-Hexanol**

|    |              |              |              |
|----|--------------|--------------|--------------|
| 7  | 3.911805000  | 0.574994000  | -0.281122000 |
| 6  | 5.002461000  | -0.185481000 | -0.525130000 |
| 6  | 6.231864000  | 0.439988000  | -0.691000000 |
| 6  | 6.317707000  | 1.829504000  | -0.593620000 |
| 6  | 5.171301000  | 2.578357000  | -0.326356000 |
| 6  | 3.963159000  | 1.914164000  | -0.172004000 |
| 1  | 2.943083000  | 0.134718000  | -0.172760000 |
| 6  | 4.927169000  | -1.702373000 | -0.611204000 |
| 8  | 5.943834000  | -2.310826000 | -0.944727000 |
| 7  | 3.760523000  | -2.294326000 | -0.298417000 |
| 1  | 7.095937000  | -0.180017000 | -0.889717000 |
| 1  | 7.275404000  | 2.322289000  | -0.720584000 |
| 1  | 5.205689000  | 3.656810000  | -0.236553000 |
| 1  | 3.017960000  | 2.392090000  | 0.056122000  |
| 1  | 3.739234000  | -3.302050000 | -0.365539000 |
| 1  | 2.899756000  | -1.809540000 | -0.039076000 |
| 8  | -3.714622000 | -0.608279000 | 0.772346000  |
| 6  | -2.938308000 | -1.192351000 | -0.269096000 |
| 6  | -1.490502000 | -1.239527000 | 0.205942000  |
| 6  | -0.938087000 | 0.163334000  | 0.447304000  |
| 16 | 0.749321000  | 0.149614000  | 1.085304000  |
| 8  | 0.750344000  | -0.623321000 | 2.348838000  |
| 8  | 1.547121000  | -0.554285000 | -0.021723000 |
| 8  | 1.180984000  | 1.569632000  | 1.202493000  |
| 1  | -3.288466000 | -2.209929000 | -0.494127000 |
| 1  | -3.005717000 | -0.608597000 | -1.198235000 |
| 1  | -1.433903000 | -1.815563000 | 1.135142000  |
| 1  | -0.880436000 | -1.755399000 | -0.542309000 |
| 1  | -0.908358000 | 0.753178000  | -0.473308000 |
| 1  | -1.540849000 | 0.697724000  | 1.184822000  |
| 6  | -5.010507000 | -0.104325000 | 0.420547000  |
| 6  | -5.900415000 | -1.135777000 | -0.284788000 |
| 6  | -7.307965000 | -0.564347000 | -0.523600000 |
| 6  | -7.247480000 | 0.749960000  | -1.316921000 |
| 6  | -6.340448000 | 1.776774000  | -0.621789000 |
| 6  | -4.933997000 | 1.204752000  | -0.378211000 |
| 1  | -5.464844000 | 0.123842000  | 1.394362000  |
| 1  | -5.943219000 | -2.051510000 | 0.315914000  |
| 1  | -5.455481000 | -1.402827000 | -1.252186000 |
| 1  | -7.926770000 | -1.301315000 | -1.047954000 |
| 1  | -7.792551000 | -0.379149000 | 0.445215000  |

|   |              |             |              |
|---|--------------|-------------|--------------|
| 1 | -8.255238000 | 1.160752000 | -1.448671000 |
| 1 | -6.854975000 | 0.545161000 | -2.323015000 |
| 1 | -6.274518000 | 2.695584000 | -1.215471000 |
| 1 | -6.787610000 | 2.057188000 | 0.342276000  |
| 1 | -4.306245000 | 1.919649000 | 0.165234000  |
| 1 | -4.450319000 | 1.019142000 | -1.345930000 |

2g

Solvent=Methanol

|    |              |              |              |
|----|--------------|--------------|--------------|
| 7  | -2.230219000 | -0.730851000 | -0.270231000 |
| 6  | -3.297795000 | 0.081465000  | -0.299315000 |
| 6  | -4.552884000 | -0.464107000 | -0.453860000 |
| 6  | -4.685797000 | -1.841501000 | -0.570416000 |
| 6  | -3.562607000 | -2.650691000 | -0.527559000 |
| 6  | -2.326912000 | -2.058340000 | -0.373796000 |
| 1  | -1.253571000 | -0.347940000 | -0.159032000 |
| 6  | -3.158030000 | 1.583228000  | -0.164779000 |
| 8  | -4.148480000 | 2.274558000  | -0.368025000 |
| 7  | -1.972342000 | 2.073318000  | 0.181489000  |
| 1  | -5.401350000 | 0.198769000  | -0.479657000 |
| 1  | -5.665105000 | -2.278386000 | -0.689767000 |
| 1  | -3.633731000 | -3.722365000 | -0.610569000 |
| 1  | -1.393119000 | -2.594921000 | -0.311930000 |
| 1  | -1.164368000 | 1.484147000  | 0.343315000  |
| 6  | 6.726894000  | -0.079511000 | -0.986095000 |
| 8  | 5.500148000  | -0.048119000 | -0.279093000 |
| 6  | 4.556650000  | 0.802011000  | -0.907569000 |
| 6  | 3.268299000  | 0.770622000  | -0.111997000 |
| 6  | 2.690598000  | -0.634381000 | -0.077275000 |
| 16 | 1.158730000  | -0.701969000 | 0.846993000  |
| 8  | 1.436147000  | -0.233352000 | 2.226795000  |
| 8  | 0.215608000  | 0.245836000  | 0.111526000  |
| 8  | 0.642857000  | -2.097551000 | 0.757070000  |
| 1  | 7.171113000  | 0.917135000  | -1.034767000 |
| 1  | 7.395667000  | -0.746376000 | -0.451809000 |
| 1  | 6.578302000  | -0.452100000 | -2.001985000 |
| 1  | 4.946427000  | 1.822654000  | -0.948217000 |
| 1  | 4.381394000  | 0.462068000  | -1.933629000 |
| 1  | 3.462826000  | 1.116353000  | 0.901772000  |
| 1  | 2.554660000  | 1.451736000  | -0.572836000 |
| 1  | 2.448584000  | -1.001396000 | -1.072614000 |
| 1  | 3.360076000  | -1.334072000 | 0.415707000  |
| 6  | -1.797494000 | 3.510854000  | 0.313689000  |
| 1  | -2.435117000 | 3.899526000  | 1.104012000  |
| 1  | -0.758860000 | 3.701660000  | 0.557639000  |
| 1  | -2.051376000 | 4.008868000  | -0.618670000 |

**Table S3. The enthalpy ( $\Delta_r H^\circ$ ) and Gibbs free energy ( $\Delta_r G^\circ$ ) of the formation reaction of salt 2a-2g**

| Reagent id | Reagent structure                                                                   | Product id | Product structure                                                                    | Yield, % | $\Delta H$ , kJ/mol | $\Delta G$ , kJ/mol |
|------------|-------------------------------------------------------------------------------------|------------|--------------------------------------------------------------------------------------|----------|---------------------|---------------------|
| 1          | $\text{CH}_3\text{-OH}$                                                             | 2a         | 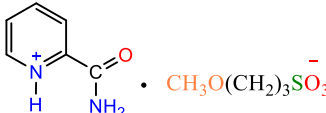   | 65       | -88.8               | -2.0                |
| 1          | $\text{C}_2\text{H}_5\text{-OH}$                                                    | 2b         |    | 85       | -87.1               | 2.4                 |
| 1          |    | 2c         |    | 59       | -85.1               | 4.5                 |
| 1          |    | 2d         |    | 57       | -89.8               | -0.9                |
| 1          |    | 2e         |   | 25       | -79.8               | 10.8                |
| 1          |  | 2f         |  | 89       | -82.2               | 9.3                 |
| 1          | $\text{CH}_3\text{-OH}$                                                             | 2g         |  | 81       | 1.2                 | 20.1                |

**S2. XYZ coordinates of the stationary points of 3a-i products; calculation by the M052X-D3/TZVP + IEFPCM approximation.**

**3a**

Solvent=Methanol

|    |              |              |              |
|----|--------------|--------------|--------------|
| 7  | 3.616002000  | -0.395441000 | -0.148365000 |
| 6  | 3.836291000  | 0.926440000  | -0.001083000 |
| 6  | 5.115032000  | 1.447092000  | -0.052307000 |
| 6  | 6.170913000  | 0.558343000  | -0.260530000 |
| 6  | 5.914665000  | -0.810219000 | -0.409862000 |
| 6  | 4.610868000  | -1.278158000 | -0.350233000 |
| 6  | 2.516624000  | 1.607998000  | 0.208659000  |
| 8  | 2.356549000  | 2.809911000  | 0.372442000  |
| 7  | 1.604061000  | 0.610790000  | 0.172324000  |
| 1  | 5.258556000  | 2.513389000  | 0.069969000  |
| 1  | 7.190034000  | 0.924967000  | -0.306428000 |
| 1  | 6.718908000  | -1.516466000 | -0.571973000 |
| 1  | 4.342085000  | -2.320686000 | -0.456177000 |
| 1  | 0.574655000  | 0.747851000  | 0.263419000  |
| 6  | -7.720032000 | 0.071401000  | -0.242203000 |
| 8  | -6.328813000 | -0.112254000 | -0.437088000 |
| 6  | -5.602524000 | 1.108469000  | -0.385488000 |
| 6  | -4.121324000 | 0.797054000  | -0.551594000 |
| 6  | -3.594242000 | -0.087193000 | 0.576039000  |
| 16 | -1.849015000 | -0.519164000 | 0.370211000  |
| 8  | -1.738863000 | -1.236251000 | -0.934699000 |
| 8  | -1.124347000 | 0.807399000  | 0.361719000  |
| 8  | -1.491105000 | -1.358100000 | 1.551218000  |
| 1  | -8.157893000 | 0.722687000  | -1.014417000 |
| 1  | -8.191505000 | -0.912629000 | -0.301583000 |
| 1  | -7.939254000 | 0.512269000  | 0.742541000  |
| 1  | -5.938179000 | 1.788911000  | -1.185160000 |
| 1  | -5.782281000 | 1.619928000  | 0.575697000  |
| 1  | -3.963630000 | 0.292731000  | -1.510489000 |
| 1  | -3.558837000 | 1.735723000  | -0.576358000 |
| 1  | -3.673980000 | 0.408538000  | 1.548069000  |
| 1  | -4.141381000 | -1.031382000 | 0.623405000  |
| 6  | 2.142232000  | -0.721332000 | -0.052236000 |
| 6  | 1.892943000  | -1.643182000 | 1.143556000  |
| 1  | 0.813039000  | -1.752308000 | 1.275581000  |
| 1  | 2.330244000  | -2.629278000 | 0.968587000  |
| 1  | 2.319635000  | -1.210349000 | 2.051125000  |
| 6  | 1.652930000  | -1.312689000 | -1.376129000 |
| 1  | 0.565891000  | -1.420502000 | -1.322666000 |
| 1  | 1.907210000  | -0.647608000 | -2.204546000 |
| 1  | 2.096865000  | -2.296392000 | -1.547961000 |

**3b**

Solvent=Methanol

|   |              |              |              |
|---|--------------|--------------|--------------|
| 7 | -3.528487000 | -0.308452000 | -0.375229000 |
| 6 | -3.817339000 | 0.960762000  | -0.024132000 |

|    |              |              |              |
|----|--------------|--------------|--------------|
| 6  | -5.124723000 | 1.401084000  | 0.051851000  |
| 6  | -6.136537000 | 0.487153000  | -0.245917000 |
| 6  | -5.809530000 | -0.825665000 | -0.607415000 |
| 6  | -4.479679000 | -1.213409000 | -0.668329000 |
| 6  | -2.530566000 | 1.684573000  | 0.239107000  |
| 8  | -2.431183000 | 2.854947000  | 0.581361000  |
| 7  | -1.565315000 | 0.764710000  | 0.011848000  |
| 6  | -2.037063000 | -0.556080000 | -0.369457000 |
| 6  | -1.565195000 | -0.937836000 | -1.773823000 |
| 6  | -1.687258000 | -1.630473000 | 0.679189000  |
| 6  | -2.127140000 | -1.297363000 | 2.104314000  |
| 1  | -5.323058000 | 2.426423000  | 0.338047000  |
| 1  | -7.176130000 | 0.790446000  | -0.197179000 |
| 1  | -6.579033000 | -1.550331000 | -0.840931000 |
| 1  | -4.156598000 | -2.210141000 | -0.937267000 |
| 1  | -0.545663000 | 0.940242000  | 0.140826000  |
| 1  | -1.892303000 | -0.190448000 | -2.500055000 |
| 1  | -0.472320000 | -0.977471000 | -1.765350000 |
| 1  | -1.952331000 | -1.918774000 | -2.060582000 |
| 1  | -2.122454000 | -2.579523000 | 0.346989000  |
| 1  | -0.599397000 | -1.746060000 | 0.645679000  |
| 1  | -1.836050000 | -2.107215000 | 2.777965000  |
| 1  | -1.650291000 | -0.379065000 | 2.457163000  |
| 1  | -3.212189000 | -1.174509000 | 2.184906000  |
| 6  | 7.693916000  | 1.046697000  | -0.555470000 |
| 8  | 6.375381000  | 0.539003000  | -0.660712000 |
| 6  | 6.072288000  | -0.411851000 | 0.351260000  |
| 6  | 4.624807000  | -0.852568000 | 0.181754000  |
| 6  | 3.650510000  | 0.311073000  | 0.351145000  |
| 16 | 1.928911000  | -0.192882000 | 0.109818000  |
| 8  | 1.821600000  | -0.687258000 | -1.294948000 |
| 8  | 1.645669000  | -1.238694000 | 1.137030000  |
| 8  | 1.137559000  | 1.073458000  | 0.339115000  |
| 1  | 8.447015000  | 0.248935000  | -0.648342000 |
| 1  | 7.835106000  | 1.761928000  | -1.369472000 |
| 1  | 7.857128000  | 1.562127000  | 0.403585000  |
| 1  | 6.744482000  | -1.282097000 | 0.274109000  |
| 1  | 6.224480000  | 0.031284000  | 1.350367000  |
| 1  | 4.495703000  | -1.291528000 | -0.812978000 |
| 1  | 4.399154000  | -1.631199000 | 0.917533000  |
| 1  | 3.706328000  | 0.738861000  | 1.356574000  |
| 1  | 3.851282000  | 1.102189000  | -0.374231000 |

**3c**

**Solvent=Methanol**

|   |              |              |              |
|---|--------------|--------------|--------------|
| 7 | -3.174671000 | 0.282010000  | -0.257657000 |
| 6 | -3.267649000 | -0.262191000 | -1.489078000 |
| 6 | -4.487593000 | -0.412898000 | -2.119025000 |
| 6 | -5.629044000 | 0.012341000  | -1.438110000 |
| 6 | -5.510956000 | 0.553877000  | -0.152994000 |
| 6 | -4.260105000 | 0.679742000  | 0.432675000  |
| 6 | -1.897625000 | -0.678555000 | -1.929774000 |

|    |              |              |              |
|----|--------------|--------------|--------------|
| 8  | -1.635207000 | -1.259401000 | -2.974818000 |
| 7  | -1.077232000 | -0.291815000 | -0.927140000 |
| 1  | -4.521221000 | -0.858318000 | -3.105461000 |
| 1  | -6.606652000 | -0.086917000 | -1.895857000 |
| 1  | -6.383141000 | 0.872979000  | 0.403244000  |
| 1  | -4.106362000 | 1.069145000  | 1.428410000  |
| 1  | -0.098077000 | -0.640215000 | -0.829100000 |
| 6  | 7.501401000  | 1.073874000  | -0.727543000 |
| 8  | 6.126663000  | 0.919281000  | -0.422003000 |
| 6  | 5.385904000  | 0.359260000  | -1.498243000 |
| 6  | 3.939995000  | 0.189679000  | -1.052753000 |
| 6  | 3.814103000  | -0.768432000 | 0.129417000  |
| 16 | 2.105484000  | -0.938540000 | 0.703460000  |
| 8  | 1.658587000  | 0.432202000  | 1.100489000  |
| 8  | 1.343792000  | -1.451889000 | -0.498264000 |
| 8  | 2.137637000  | -1.914610000 | 1.826344000  |
| 1  | 7.655498000  | 1.743567000  | -1.587783000 |
| 1  | 7.984675000  | 1.509961000  | 0.150186000  |
| 1  | 7.979877000  | 0.108681000  | -0.954636000 |
| 1  | 5.434892000  | 1.017433000  | -2.381204000 |
| 1  | 5.814780000  | -0.614112000 | -1.791875000 |
| 1  | 3.532260000  | 1.166213000  | -0.772283000 |
| 1  | 3.347110000  | -0.185622000 | -1.892943000 |
| 1  | 4.152323000  | -1.775971000 | -0.130709000 |
| 1  | 4.395916000  | -0.418147000 | 0.984832000  |
| 6  | -1.730797000 | 0.360886000  | 0.198324000  |
| 6  | -1.251929000 | 1.830008000  | 0.261618000  |
| 1  | -0.163984000 | 1.746396000  | 0.352852000  |
| 1  | -1.464235000 | 2.286264000  | -0.712007000 |
| 6  | -1.786351000 | 2.720877000  | 1.388418000  |
| 1  | -1.626526000 | 2.241618000  | 2.360262000  |
| 1  | -2.865593000 | 2.878639000  | 1.280967000  |
| 6  | -1.087913000 | 4.085896000  | 1.379238000  |
| 1  | -1.243197000 | 4.601260000  | 0.425153000  |
| 1  | -0.008610000 | 3.972739000  | 1.526856000  |
| 1  | -1.473050000 | 4.728669000  | 2.176291000  |
| 6  | -1.536515000 | -0.407828000 | 1.516312000  |
| 1  | -0.508170000 | -0.201212000 | 1.826383000  |
| 1  | -2.188895000 | 0.030727000  | 2.278925000  |
| 6  | -1.766264000 | -1.919828000 | 1.431833000  |
| 1  | -1.127867000 | -2.335503000 | 0.646208000  |
| 1  | -2.805037000 | -2.130518000 | 1.146898000  |
| 6  | -1.435432000 | -2.602798000 | 2.762135000  |
| 1  | -2.038887000 | -2.196199000 | 3.581504000  |
| 1  | -0.378629000 | -2.455187000 | 3.006827000  |
| 1  | -1.624777000 | -3.679230000 | 2.707590000  |

**3d**

**Solvent=Methanol**

|   |             |             |              |
|---|-------------|-------------|--------------|
| 7 | 2.943115000 | 0.483539000 | 0.077214000  |
| 6 | 2.354153000 | 1.640310000 | -0.291284000 |

|    |              |              |              |
|----|--------------|--------------|--------------|
| 6  | 3.027137000  | 2.844082000  | -0.208728000 |
| 6  | 4.337957000  | 2.825187000  | 0.268874000  |
| 6  | 4.926808000  | 1.611553000  | 0.645788000  |
| 6  | 4.205585000  | 0.432550000  | 0.542864000  |
| 6  | 0.960437000  | 1.334688000  | -0.747356000 |
| 8  | 0.142990000  | 2.160970000  | -1.136995000 |
| 7  | 0.840347000  | -0.003743000 | -0.615891000 |
| 6  | 2.017820000  | -0.681483000 | -0.103745000 |
| 6  | 2.561283000  | -1.733706000 | -1.092989000 |
| 6  | 1.744206000  | -1.465117000 | 1.215243000  |
| 6  | 1.723787000  | -2.968037000 | -0.733244000 |
| 6  | 1.722073000  | -2.961185000 | 0.809364000  |
| 1  | 2.523659000  | 3.753551000  | -0.511947000 |
| 1  | 4.901987000  | 3.747273000  | 0.350531000  |
| 1  | 5.941752000  | 1.574226000  | 1.020377000  |
| 1  | 4.599984000  | -0.536271000 | 0.819464000  |
| 1  | -0.034209000 | -0.535699000 | -0.836009000 |
| 1  | 2.471200000  | -1.391539000 | -2.125981000 |
| 1  | 3.619422000  | -1.921533000 | -0.878355000 |
| 1  | 2.519550000  | -1.248204000 | 1.954412000  |
| 1  | 0.783073000  | -1.145610000 | 1.617194000  |
| 1  | 0.703467000  | -2.842272000 | -1.109533000 |
| 1  | 2.136401000  | -3.885611000 | -1.159853000 |
| 1  | 2.616006000  | -3.467291000 | 1.187900000  |
| 1  | 0.841352000  | -3.458173000 | 1.218028000  |
| 6  | -5.165108000 | 3.305757000  | -0.050209000 |
| 8  | -4.240499000 | 2.250053000  | -0.242204000 |
| 6  | -3.473012000 | 1.975366000  | 0.922518000  |
| 6  | -2.544712000 | 0.806654000  | 0.623908000  |
| 6  | -3.316230000 | -0.466794000 | 0.285376000  |
| 16 | -2.226463000 | -1.876058000 | -0.043770000 |
| 8  | -1.374839000 | -1.442182000 | -1.220449000 |
| 8  | -1.414354000 | -2.069211000 | 1.193058000  |
| 8  | -3.113783000 | -3.018800000 | -0.384843000 |
| 1  | -4.660028000 | 4.247978000  | 0.213595000  |
| 1  | -5.703068000 | 3.445356000  | -0.991126000 |
| 1  | -5.891580000 | 3.072898000  | 0.743741000  |
| 1  | -2.882381000 | 2.861113000  | 1.209395000  |
| 1  | -4.138170000 | 1.736669000  | 1.770252000  |
| 1  | -1.891836000 | 1.081133000  | -0.209911000 |
| 1  | -1.907779000 | 0.627635000  | 1.496589000  |
| 1  | -3.966072000 | -0.773694000 | 1.110958000  |
| 1  | -3.932798000 | -0.329154000 | -0.605464000 |

3e

Solvent=Methanol

|   |             |              |              |
|---|-------------|--------------|--------------|
| 7 | 3.736287000 | 0.294939000  | 0.038820000  |
| 6 | 3.447949000 | 1.610724000  | -0.028083000 |
| 6 | 4.446321000 | 2.565130000  | -0.000012000 |
| 6 | 5.766025000 | 2.123647000  | 0.102006000  |
| 6 | 6.039936000 | 0.752178000  | 0.171380000  |
| 6 | 4.998810000 | -0.162467000 | 0.139213000  |

|    |              |              |              |
|----|--------------|--------------|--------------|
| 6  | 1.962826000  | 1.764085000  | -0.143115000 |
| 8  | 1.366041000  | 2.826318000  | -0.252646000 |
| 7  | 1.476794000  | 0.500389000  | -0.105324000 |
| 6  | 2.483948000  | -0.544134000 | 0.001945000  |
| 6  | 2.363321000  | -1.347048000 | 1.311709000  |
| 6  | 2.494961000  | -1.471601000 | -1.227041000 |
| 6  | 1.110688000  | -2.234949000 | 1.291348000  |
| 6  | 1.237423000  | -2.355774000 | -1.244038000 |
| 6  | 1.085837000  | -3.152528000 | 0.059720000  |
| 1  | 4.178446000  | 3.612757000  | -0.057306000 |
| 1  | 6.579897000  | 2.839266000  | 0.127415000  |
| 1  | 7.056065000  | 0.387149000  | 0.249474000  |
| 1  | 5.143724000  | -1.233058000 | 0.188384000  |
| 1  | 0.470097000  | 0.302923000  | -0.296404000 |
| 1  | 3.256592000  | -1.974333000 | 1.413127000  |
| 1  | 2.345844000  | -0.648040000 | 2.153123000  |
| 1  | 2.568832000  | -0.859082000 | -2.130534000 |
| 1  | 3.388610000  | -2.104240000 | -1.174077000 |
| 1  | 1.094889000  | -2.830745000 | 2.210140000  |
| 1  | 0.214885000  | -1.606288000 | 1.314206000  |
| 1  | 0.349368000  | -1.734521000 | -1.392605000 |
| 1  | 1.301649000  | -3.033437000 | -2.101686000 |
| 1  | 1.899350000  | -3.887146000 | 0.137118000  |
| 1  | 0.143670000  | -3.707976000 | 0.036326000  |
| 6  | -7.313033000 | 2.273047000  | 0.098798000  |
| 8  | -6.146175000 | 1.523208000  | 0.387231000  |
| 6  | -6.213216000 | 0.192840000  | -0.108780000 |
| 6  | -4.897829000 | -0.506701000 | 0.205317000  |
| 6  | -3.712573000 | 0.170243000  | -0.478897000 |
| 16 | -2.134831000 | -0.620061000 | -0.067196000 |
| 8  | -1.949192000 | -0.461511000 | 1.404608000  |
| 8  | -2.239905000 | -2.036572000 | -0.517706000 |
| 8  | -1.117534000 | 0.170423000  | -0.860717000 |
| 1  | -8.210121000 | 1.822234000  | 0.550741000  |
| 1  | -7.171396000 | 3.272606000  | 0.517102000  |
| 1  | -7.483296000 | 2.361819000  | -0.985331000 |
| 1  | -7.051888000 | -0.349023000 | 0.358413000  |
| 1  | -6.394172000 | 0.199457000  | -1.197370000 |
| 1  | -4.739304000 | -0.506541000 | 1.288813000  |
| 1  | -4.961756000 | -1.550745000 | -0.117787000 |
| 1  | -3.800854000 | 0.129383000  | -1.568731000 |
| 1  | -3.627645000 | 1.216171000  | -0.176851000 |

**3f**

**Solvent=Ethanol**

|   |             |              |              |
|---|-------------|--------------|--------------|
| 7 | 3.980371000 | -0.451073000 | -0.155228000 |
| 6 | 4.231769000 | 0.869948000  | -0.060050000 |
| 6 | 5.520751000 | 1.359736000  | -0.148046000 |
| 6 | 6.553662000 | 0.440757000  | -0.338947000 |
| 6 | 6.265197000 | -0.926241000 | -0.434886000 |
| 6 | 4.952538000 | -1.362490000 | -0.339824000 |
| 6 | 2.930937000 | 1.588435000  | 0.144286000  |



|    |              |              |              |
|----|--------------|--------------|--------------|
| 8  | 2.801833000  | 2.797963000  | 0.275586000  |
| 7  | 1.994900000  | 0.612578000  | 0.146602000  |
| 1  | 5.688982000  | 2.426362000  | -0.066987000 |
| 1  | 7.579849000  | 0.782252000  | -0.413128000 |
| 1  | 7.051402000  | -1.655529000 | -0.582857000 |
| 1  | 4.659582000  | -2.401765000 | -0.405576000 |
| 1  | 0.974142000  | 0.772788000  | 0.287949000  |
| 6  | -7.313292000 | 0.357798000  | -0.221531000 |
| 8  | -5.915424000 | 0.175717000  | -0.410866000 |
| 6  | -5.165352000 | 1.370280000  | -0.241704000 |
| 6  | -3.688218000 | 1.038346000  | -0.407303000 |
| 6  | -3.207630000 | 0.044344000  | 0.647371000  |
| 16 | -1.475706000 | -0.430099000 | 0.425391000  |
| 8  | -1.371685000 | -1.034748000 | -0.935870000 |
| 8  | -0.705099000 | 0.865178000  | 0.540926000  |
| 8  | -1.163685000 | -1.380636000 | 1.532373000  |
| 1  | -7.699759000 | 1.103271000  | -0.936305000 |
| 1  | -7.511734000 | 0.747817000  | 0.790598000  |
| 1  | -5.469344000 | 2.124681000  | -0.985636000 |
| 1  | -5.352185000 | 1.801969000  | 0.756459000  |
| 1  | -3.523334000 | 0.615328000  | -1.403594000 |
| 1  | -3.102146000 | 1.960279000  | -0.339223000 |
| 1  | -3.285311000 | 0.458094000  | 1.657194000  |
| 1  | -3.787646000 | -0.880297000 | 0.606586000  |
| 6  | 2.500380000  | -0.739235000 | -0.031629000 |
| 6  | 2.240655000  | -1.608518000 | 1.200707000  |
| 1  | 1.159330000  | -1.698784000 | 1.337576000  |
| 1  | 2.663203000  | -2.607164000 | 1.065016000  |
| 1  | 2.675620000  | -1.145793000 | 2.089359000  |
| 6  | 1.986698000  | -1.369917000 | -1.327875000 |
| 1  | 0.896836000  | -1.437085000 | -1.268625000 |
| 1  | 2.259622000  | -0.749271000 | -2.184337000 |
| 1  | 2.397518000  | -2.374176000 | -1.458528000 |
| 6  | -7.998906000 | -0.982823000 | -0.422337000 |
| 1  | -9.079498000 | -0.884281000 | -0.282266000 |
| 1  | -7.812536000 | -1.361204000 | -1.431933000 |
| 1  | -7.620852000 | -1.716749000 | 0.295805000  |

**3g**

**Solvent=2-Propanol**

|   |             |              |              |
|---|-------------|--------------|--------------|
| 7 | 4.327810000 | -0.362827000 | -0.159213000 |
| 6 | 4.532566000 | 0.949078000  | 0.073006000  |
| 6 | 5.806300000 | 1.484676000  | 0.069300000  |
| 6 | 6.873681000 | 0.621678000  | -0.182643000 |
| 6 | 6.633674000 | -0.737372000 | -0.420618000 |
| 6 | 5.334387000 | -1.221012000 | -0.404862000 |
| 6 | 3.203662000 | 1.604170000  | 0.308933000  |
| 8 | 3.031585000 | 2.791590000  | 0.547890000  |
| 7 | 2.301516000 | 0.603356000  | 0.195921000  |
| 1 | 5.936430000 | 2.542700000  | 0.259671000  |
| 1 | 7.889250000 | 1.000718000  | -0.194172000 |

|    |              |              |              |
|----|--------------|--------------|--------------|
| 1  | 7.447246000  | -1.423800000 | -0.617719000 |
| 1  | 5.077718000  | -2.257520000 | -0.578201000 |
| 1  | 1.269549000  | 0.721441000  | 0.297307000  |
| 6  | -6.946170000 | -0.262936000 | -0.246785000 |
| 8  | -5.567389000 | -0.185739000 | -0.644873000 |
| 6  | -4.896695000 | 1.049300000  | -0.413174000 |
| 6  | -3.400523000 | 0.796408000  | -0.558691000 |
| 6  | -2.886169000 | -0.178985000 | 0.496931000  |
| 16 | -1.133666000 | -0.577535000 | 0.292140000  |
| 8  | -0.988775000 | -1.169055000 | -1.071159000 |
| 8  | -0.420687000 | 0.749131000  | 0.423507000  |
| 8  | -0.792490000 | -1.520382000 | 1.397262000  |
| 1  | -7.264378000 | -1.230670000 | -0.653042000 |
| 1  | -5.217195000 | 1.810498000  | -1.139185000 |
| 1  | -5.111902000 | 1.442051000  | 0.591163000  |
| 1  | -3.200307000 | 0.388091000  | -1.554736000 |
| 1  | -2.863685000 | 1.746933000  | -0.477432000 |
| 1  | -2.992397000 | 0.226437000  | 1.507597000  |
| 1  | -3.426199000 | -1.126988000 | 0.445643000  |
| 6  | 2.855754000  | -0.707961000 | -0.099880000 |
| 6  | 2.603074000  | -1.700266000 | 1.037552000  |
| 1  | 1.523002000  | -1.832488000 | 1.146798000  |
| 1  | 3.057613000  | -2.668695000 | 0.813831000  |
| 1  | 3.010404000  | -1.313587000 | 1.974496000  |
| 6  | 2.387145000  | -1.225836000 | -1.461337000 |
| 1  | 1.300486000  | -1.345040000 | -1.426872000 |
| 1  | 2.643448000  | -0.511448000 | -2.246931000 |
| 1  | 2.841616000  | -2.194197000 | -1.685348000 |
| 6  | -7.804466000 | 0.831470000  | -0.884677000 |
| 1  | -8.864554000 | 0.628701000  | -0.704071000 |
| 1  | -7.577539000 | 1.816915000  | -0.465095000 |
| 1  | -7.638107000 | 0.867841000  | -1.965517000 |
| 6  | -7.094873000 | -0.313415000 | 1.276451000  |
| 1  | -6.442957000 | -1.085816000 | 1.694608000  |
| 1  | -6.840684000 | 0.644236000  | 1.741795000  |
| 1  | -8.129528000 | -0.547783000 | 1.546168000  |

**3i**

**Solvent=2-Methyl-2-Propanol**

|   |             |              |              |
|---|-------------|--------------|--------------|
| 7 | 4.621282000 | -0.405661000 | -0.130383000 |
| 6 | 4.845629000 | 0.917864000  | -0.011871000 |
| 6 | 6.127244000 | 1.432336000  | -0.065007000 |
| 6 | 7.180828000 | 0.535299000  | -0.245349000 |
| 6 | 6.920075000 | -0.835642000 | -0.365413000 |
| 6 | 5.614020000 | -1.296685000 | -0.305140000 |
| 6 | 3.527228000 | 1.609753000  | 0.176897000  |
| 8 | 3.376391000 | 2.814359000  | 0.325989000  |
| 7 | 2.609657000 | 0.617148000  | 0.143703000  |
| 1 | 6.273137000 | 2.500749000  | 0.034378000  |
| 1 | 8.201874000 | 0.896653000  | -0.292215000 |
| 1 | 7.722867000 | -1.548433000 | -0.505017000 |

|    |              |              |              |
|----|--------------|--------------|--------------|
| 1  | 5.341112000  | -2.340183000 | -0.389176000 |
| 1  | 1.582301000  | 0.751245000  | 0.278899000  |
| 6  | -6.635379000 | -0.019490000 | -0.124510000 |
| 8  | -5.259975000 | 0.064306000  | -0.560011000 |
| 6  | -4.544271000 | 1.264257000  | -0.292075000 |
| 6  | -3.059724000 | 0.963397000  | -0.466866000 |
| 6  | -2.575952000 | -0.082827000 | 0.533648000  |
| 16 | -0.834240000 | -0.517576000 | 0.313231000  |
| 8  | -0.692472000 | -1.022651000 | -1.084470000 |
| 8  | -0.086085000 | 0.777548000  | 0.536269000  |
| 8  | -0.530157000 | -1.539243000 | 1.357510000  |
| 1  | -4.846146000 | 2.063597000  | -0.984419000 |
| 1  | -4.730978000 | 1.626831000  | 0.729061000  |
| 1  | -2.882696000 | 0.598082000  | -1.483685000 |
| 1  | -2.486359000 | 1.887759000  | -0.343261000 |
| 1  | -2.674162000 | 0.268768000  | 1.565149000  |
| 1  | -3.142943000 | -1.010322000 | 0.428727000  |
| 6  | 3.143563000  | -0.721775000 | -0.044956000 |
| 6  | 2.872785000  | -1.616768000 | 1.166037000  |
| 1  | 1.790525000  | -1.730524000 | 1.275627000  |
| 1  | 3.317343000  | -2.604765000 | 1.022531000  |
| 1  | 3.278081000  | -1.161395000 | 2.072413000  |
| 6  | 2.672619000  | -1.339340000 | -1.363782000 |
| 1  | 1.583009000  | -1.426883000 | -1.333165000 |
| 1  | 2.953266000  | -0.698039000 | -2.202512000 |
| 1  | 3.105556000  | -2.333388000 | -1.502337000 |
| 6  | -7.132375000 | -1.320469000 | -0.760399000 |
| 1  | -8.171305000 | -1.517531000 | -0.480442000 |
| 1  | -7.068567000 | -1.256876000 | -1.850679000 |
| 1  | -6.515535000 | -2.160898000 | -0.428114000 |
| 6  | -7.453264000 | 1.173901000  | -0.637526000 |
| 1  | -7.340097000 | 1.273078000  | -1.721608000 |
| 1  | -8.514000000 | 1.028459000  | -0.412046000 |
| 1  | -7.139063000 | 2.111140000  | -0.168774000 |
| 6  | -6.702620000 | -0.118556000 | 1.407133000  |
| 1  | -7.733040000 | -0.292215000 | 1.732391000  |
| 1  | -6.082252000 | -0.949411000 | 1.756146000  |
| 1  | -6.354715000 | 0.799221000  | 1.889959000  |

3j

Solvent=1-Hexanol

|   |             |              |              |
|---|-------------|--------------|--------------|
| 7 | 5.316663000 | -0.324251000 | -0.079718000 |
| 6 | 5.488251000 | 0.980216000  | 0.212342000  |
| 6 | 6.751745000 | 1.534871000  | 0.288482000  |
| 6 | 7.843972000 | 0.698889000  | 0.053126000  |
| 6 | 7.638216000 | -0.653787000 | -0.246341000 |
| 6 | 6.347944000 | -1.157190000 | -0.309123000 |
| 6 | 4.138930000 | 1.605376000  | 0.413123000  |
| 8 | 3.938743000 | 2.778950000  | 0.693788000  |
| 7 | 3.259763000 | 0.597068000  | 0.216623000  |
| 1 | 6.854322000 | 2.586558000  | 0.525357000  |

|    |              |              |              |
|----|--------------|--------------|--------------|
| 1  | 8.852523000  | 1.093466000  | 0.102192000  |
| 1  | 8.471732000  | -1.319636000 | -0.430584000 |
| 1  | 6.116979000  | -2.190279000 | -0.531645000 |
| 1  | 2.221502000  | 0.690481000  | 0.289060000  |
| 8  | -4.569287000 | -0.159471000 | -0.938417000 |
| 6  | -3.886311000 | 1.045830000  | -0.604593000 |
| 6  | -2.390615000 | 0.783639000  | -0.735180000 |
| 6  | -1.914511000 | -0.280103000 | 0.250457000  |
| 16 | -0.150344000 | -0.646153000 | 0.090041000  |
| 8  | 0.067414000  | -1.097112000 | -1.316371000 |
| 8  | 0.538301000  | 0.667027000  | 0.386697000  |
| 8  | 0.148840000  | -1.691450000 | 1.112002000  |
| 1  | -4.181960000 | 1.861104000  | -1.280733000 |
| 1  | -4.118827000 | 1.368742000  | 0.420258000  |
| 1  | -2.168524000 | 0.454582000  | -1.755521000 |
| 1  | -1.844878000 | 1.717043000  | -0.563345000 |
| 1  | -2.067419000 | 0.033316000  | 1.287588000  |
| 1  | -2.443417000 | -1.222382000 | 0.092408000  |
| 6  | 3.848545000  | -0.692276000 | -0.106895000 |
| 6  | 3.556975000  | -1.736513000 | 0.973228000  |
| 1  | 2.474846000  | -1.886071000 | 1.025482000  |
| 1  | 4.033777000  | -2.689282000 | 0.729022000  |
| 1  | 3.914985000  | -1.387264000 | 1.944378000  |
| 6  | 3.455771000  | -1.157308000 | -1.511379000 |
| 1  | 2.370445000  | -1.291010000 | -1.537022000 |
| 1  | 3.739164000  | -0.406604000 | -2.252737000 |
| 1  | 3.935519000  | -2.109070000 | -1.753811000 |
| 6  | -5.936826000 | -0.273248000 | -0.523822000 |
| 6  | -6.821170000 | 0.889132000  | -0.993759000 |
| 6  | -8.290800000 | 0.639201000  | -0.616508000 |
| 6  | -8.444609000 | 0.402195000  | 0.893713000  |
| 6  | -7.544688000 | -0.748448000 | 1.369599000  |
| 6  | -6.075527000 | -0.502145000 | 0.988330000  |
| 1  | -6.279863000 | -1.184593000 | -1.032626000 |
| 1  | -6.708337000 | 1.018396000  | -2.076323000 |
| 1  | -6.485017000 | 1.820161000  | -0.519139000 |
| 1  | -8.908687000 | 1.485635000  | -0.937228000 |
| 1  | -8.659074000 | -0.242536000 | -1.159426000 |
| 1  | -9.491973000 | 0.192860000  | 1.140686000  |
| 1  | -8.169884000 | 1.320549000  | 1.431673000  |
| 1  | -7.634021000 | -0.883172000 | 2.453548000  |
| 1  | -7.885061000 | -1.685799000 | 0.907413000  |
| 1  | -5.444435000 | -1.348509000 | 1.281171000  |
| 1  | -5.707725000 | 0.378500000  | 1.530514000  |

**3h**

**Solvent=2-Methyl-1-Propanol**

|   |              |              |              |
|---|--------------|--------------|--------------|
| 7 | -3.866202000 | -0.651519000 | -0.584823000 |
| 6 | -4.061834000 | -0.841522000 | 0.723745000  |
| 6 | -5.118208000 | -1.583650000 | 1.187840000  |
| 6 | -5.975819000 | -2.132331000 | 0.244397000  |
| 6 | -5.750523000 | -1.922202000 | -1.111582000 |
| 6 | -4.670844000 | -1.166744000 | -1.516373000 |

|    |              |              |              |
|----|--------------|--------------|--------------|
| 6  | -2.979144000 | -0.116872000 | 1.466260000  |
| 8  | -2.872909000 | -0.065472000 | 2.674299000  |
| 7  | -2.211577000 | 0.429831000  | 0.514787000  |
| 1  | -5.252014000 | -1.718450000 | 2.249017000  |
| 1  | -6.820558000 | -2.723566000 | 0.561519000  |
| 1  | -6.407005000 | -2.340030000 | -1.856544000 |
| 1  | -4.436619000 | -0.963973000 | -2.548572000 |
| 1  | -1.441239000 | 1.090918000  | 0.720359000  |
| 6  | 4.993858000  | -1.750135000 | 0.439200000  |
| 8  | 3.869763000  | -0.964811000 | 0.077901000  |
| 6  | 2.838257000  | -1.027445000 | 1.046674000  |
| 6  | 1.711591000  | -0.113503000 | 0.611734000  |
| 6  | 2.181302000  | 1.328891000  | 0.528466000  |
| 16 | 0.854327000  | 2.434637000  | 0.038795000  |
| 8  | 0.380657000  | 1.974140000  | -1.303204000 |
| 8  | -0.227347000 | 2.260591000  | 1.078397000  |
| 8  | 1.419965000  | 3.810236000  | 0.036794000  |
| 1  | 4.692208000  | -2.798130000 | 0.538299000  |
| 1  | 2.476276000  | -2.055181000 | 1.138827000  |
| 1  | 3.228614000  | -0.714291000 | 2.020473000  |
| 1  | 1.342562000  | -0.438664000 | -0.359842000 |
| 1  | 0.896176000  | -0.196191000 | 1.329802000  |
| 1  | 2.529670000  | 1.696709000  | 1.491734000  |
| 1  | 2.965642000  | 1.454754000  | -0.212885000 |
| 6  | -2.642867000 | 0.180482000  | -0.847651000 |
| 6  | -3.022390000 | 1.468099000  | -1.556192000 |
| 1  | -2.119408000 | 2.069917000  | -1.633041000 |
| 1  | -3.390480000 | 1.260727000  | -2.558398000 |
| 1  | -3.776743000 | 2.006320000  | -0.987772000 |
| 6  | -1.628421000 | -0.641364000 | -1.624215000 |
| 1  | -0.728873000 | -0.037873000 | -1.718273000 |
| 1  | -1.402408000 | -1.562770000 | -1.092470000 |
| 1  | -2.003840000 | -0.870692000 | -2.619192000 |
| 1  | 5.380337000  | -1.413325000 | 1.408891000  |
| 6  | 6.073523000  | -1.609417000 | -0.616238000 |
| 1  | 5.645977000  | -1.926999000 | -1.569471000 |
| 6  | 6.533801000  | -0.160540000 | -0.733497000 |
| 1  | 7.302848000  | -0.062253000 | -1.498719000 |
| 1  | 5.704853000  | 0.495783000  | -0.988226000 |
| 1  | 6.956138000  | 0.173894000  | 0.216178000  |
| 6  | 7.242174000  | -2.526154000 | -0.266931000 |
| 1  | 6.926176000  | -3.566622000 | -0.197937000 |
| 1  | 8.022470000  | -2.456331000 | -1.022982000 |
| 1  | 7.676676000  | -2.237106000 | 0.691426000  |

| Product id | Structure                                                                            |
|------------|--------------------------------------------------------------------------------------|
| 2a         | 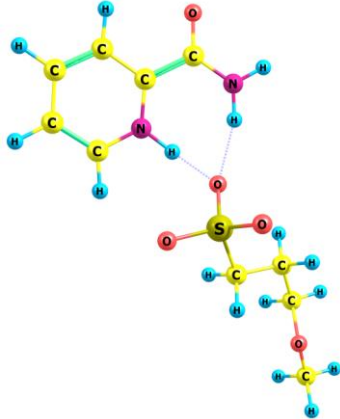   |
| 2b         |   |
| 2c         |  |
| 2d         |  |

|    |                                                                                                                                                                                                                                                                                                                                                                                                                                                                                                                                |
|----|--------------------------------------------------------------------------------------------------------------------------------------------------------------------------------------------------------------------------------------------------------------------------------------------------------------------------------------------------------------------------------------------------------------------------------------------------------------------------------------------------------------------------------|
| 2e | 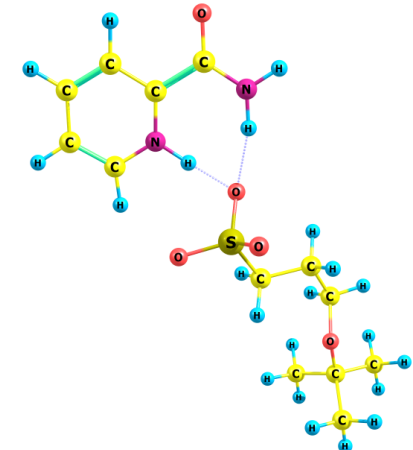 <p>ORTEP diagram of compound 2e. The molecule consists of a 1,3,5-triazine-2-carboxamide ring system. The amide group is linked to a sulfur atom, which is part of a five-membered ring containing two carbon atoms and two oxygen atoms. This sulfur atom is also bonded to a methyl group. The structure is shown with thermal ellipsoids at the 50% probability level. Hydrogen atoms are shown as small spheres of arbitrary radii.</p> |
| 2f |  <p>ORTEP diagram of compound 2f. The molecule is similar to 2e, but the sulfur atom is part of a different five-membered ring system. The structure is shown with thermal ellipsoids at the 50% probability level. Hydrogen atoms are shown as small spheres of arbitrary radii.</p>                                                                                                                                                       |
| 2g |  <p>ORTEP diagram of compound 2g. The molecule is similar to 2e, but the sulfur atom is part of a different five-membered ring system. The structure is shown with thermal ellipsoids at the 50% probability level. Hydrogen atoms are shown as small spheres of arbitrary radii.</p>                                                                                                                                                      |
| 3a |  <p>ORTEP diagram of compound 3a. The molecule is similar to 2e, but the sulfur atom is part of a different five-membered ring system. The structure is shown with thermal ellipsoids at the 50% probability level. Hydrogen atoms are shown as small spheres of arbitrary radii.</p>                                                                                                                                                      |

|    |                                                                                                                                                                                                                                                                                                                                                                                                                                                                                                                                                                  |
|----|------------------------------------------------------------------------------------------------------------------------------------------------------------------------------------------------------------------------------------------------------------------------------------------------------------------------------------------------------------------------------------------------------------------------------------------------------------------------------------------------------------------------------------------------------------------|
| 3b | 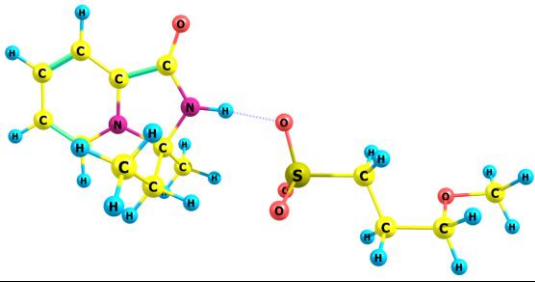 <p>ORTEP diagram of compound 3b. The molecule consists of a 1,2,4-triazole ring substituted with a methyl group and a 2-mercaptoethyl group. The triazole ring is shown in a perspective view, with the methyl group and the 2-mercaptoethyl group extending from it. The sulfur atom is bonded to a methyl group and a hydroxymethyl group. The hydroxyl group is shown as a red sphere (O) bonded to a yellow sphere (C), which is in turn bonded to a blue sphere (H).</p> |
| 3c |  <p>ORTEP diagram of compound 3c. The molecule is similar to 3b, but the hydroxyl group is replaced by a methoxy group. The methoxy group is shown as a red sphere (O) bonded to a yellow sphere (C), which is bonded to three blue spheres (H).</p>                                                                                                                                                                                                                           |
| 3d |  <p>ORTEP diagram of compound 3d. The molecule is similar to 3b, but the hydroxyl group is replaced by a methylthio group. The methylthio group is shown as a red sphere (S) bonded to a yellow sphere (C), which is bonded to three blue spheres (H).</p>                                                                                                                                                                                                                    |
| 3e |  <p>ORTEP diagram of compound 3e. The molecule is similar to 3b, but the hydroxyl group is replaced by a 2-mercaptoethyl group. The 2-mercaptoethyl group is shown as a red sphere (S) bonded to a yellow sphere (C), which is bonded to a red sphere (O), which is in turn bonded to a yellow sphere (C), which is bonded to three blue spheres (H).</p>                                                                                                                    |
| 3f |  <p>ORTEP diagram of compound 3f. The molecule is similar to 3b, but the hydroxyl group is replaced by a 2-mercaptoethyl group. The 2-mercaptoethyl group is shown as a red sphere (S) bonded to a yellow sphere (C), which is bonded to a red sphere (O), which is in turn bonded to a yellow sphere (C), which is bonded to three blue spheres (H).</p>                                                                                                                    |
| 3g |  <p>ORTEP diagram of compound 3g. The molecule is similar to 3b, but the hydroxyl group is replaced by a 2-mercaptoethyl group. The 2-mercaptoethyl group is shown as a red sphere (S) bonded to a yellow sphere (C), which is bonded to a red sphere (O), which is in turn bonded to a yellow sphere (C), which is bonded to three blue spheres (H).</p>                                                                                                                    |



|    |                                                                                                                                                                                                                                                                                                                                                                                                                                                                                                                                                                                                                                                                                  |
|----|----------------------------------------------------------------------------------------------------------------------------------------------------------------------------------------------------------------------------------------------------------------------------------------------------------------------------------------------------------------------------------------------------------------------------------------------------------------------------------------------------------------------------------------------------------------------------------------------------------------------------------------------------------------------------------|
| 3h | 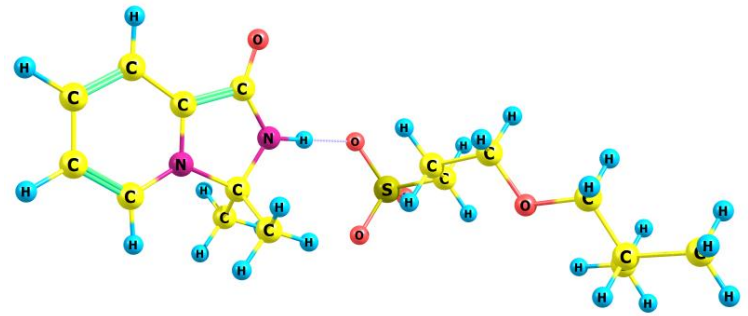 <p>ORTEP diagram of compound 3h. The molecule features a pyrazole ring substituted with a methyl group and a 1-oxo-2-((methylthio)methyl)-2-oxoethyl group. The pyrazole ring is shown in a chair-like conformation. The methylthio group is oriented away from the pyrazole ring. The 1-oxo-2-((methylthio)methyl)-2-oxoethyl group is shown in a chair-like conformation. The methyl group is oriented away from the pyrazole ring. The 1-oxo-2-((methylthio)methyl)-2-oxoethyl group is shown in a chair-like conformation. The methyl group is oriented away from the pyrazole ring.</p>  |
| 3i |  <p>ORTEP diagram of compound 3i. The molecule features a pyrazole ring substituted with a methyl group and a 1-oxo-2-((methylthio)methyl)-2-oxoethyl group. The pyrazole ring is shown in a chair-like conformation. The methylthio group is oriented away from the pyrazole ring. The 1-oxo-2-((methylthio)methyl)-2-oxoethyl group is shown in a chair-like conformation. The methyl group is oriented away from the pyrazole ring. The 1-oxo-2-((methylthio)methyl)-2-oxoethyl group is shown in a chair-like conformation. The methyl group is oriented away from the pyrazole ring.</p>  |
| 3j |  <p>ORTEP diagram of compound 3j. The molecule features a pyrazole ring substituted with a methyl group and a 1-oxo-2-((methylthio)methyl)-2-oxoethyl group. The pyrazole ring is shown in a chair-like conformation. The methylthio group is oriented away from the pyrazole ring. The 1-oxo-2-((methylthio)methyl)-2-oxoethyl group is shown in a chair-like conformation. The methyl group is oriented away from the pyrazole ring. The 1-oxo-2-((methylthio)methyl)-2-oxoethyl group is shown in a chair-like conformation. The methyl group is oriented away from the pyrazole ring.</p> |

**Table S4. The enthalpy ( $\Delta_r H^\circ$ ) and Gibbs free energy ( $\Delta_r G^\circ$ ) of the formation reaction of salt 3a-3k**

| Reagent id | Reagent structure | Product id | Product structure | Yield, % | $\Delta H$ , kJ/mol | $\Delta G$ , kJ/mol |
|------------|-------------------|------------|-------------------|----------|---------------------|---------------------|
| 2a         |                   | 3a         |                   | 80       | -23.5               | -5.1                |
| 2a         |                   | 3b         |                   | 91       | -21.1               | -4.7                |
| 2a         |                   | 3c         |                   | 75       | -14.9               | 5.5                 |
| 2a         |                   | 3d         |                   | 85       | -5.2                | 11.9                |
| 2a         |                   | 3e         |                   | 94       | -18.8               | -0.9                |
| 2b         |                   | 3f         |                   | 82       | -18.6               | -8.1                |
| 2c         |                   | 3g         |                   | 43       | -5.8                | 11.0                |
| 2d         |                   | 3h         |                   | 73       | -12.8               | 4.5                 |
| 2e         |                   | 3i         |                   | 23       | -9.1                | 10.1                |

|           |  |           |  |    |      |     |
|-----------|--|-----------|--|----|------|-----|
| <b>2f</b> |  | <b>3j</b> |  | 80 | -8.9 | 8.9 |
|-----------|--|-----------|--|----|------|-----|

**Table S5.  $^{13}\text{C}$  NMR chemical shifts (theoretical calculations).**

$TMS = 189.594$

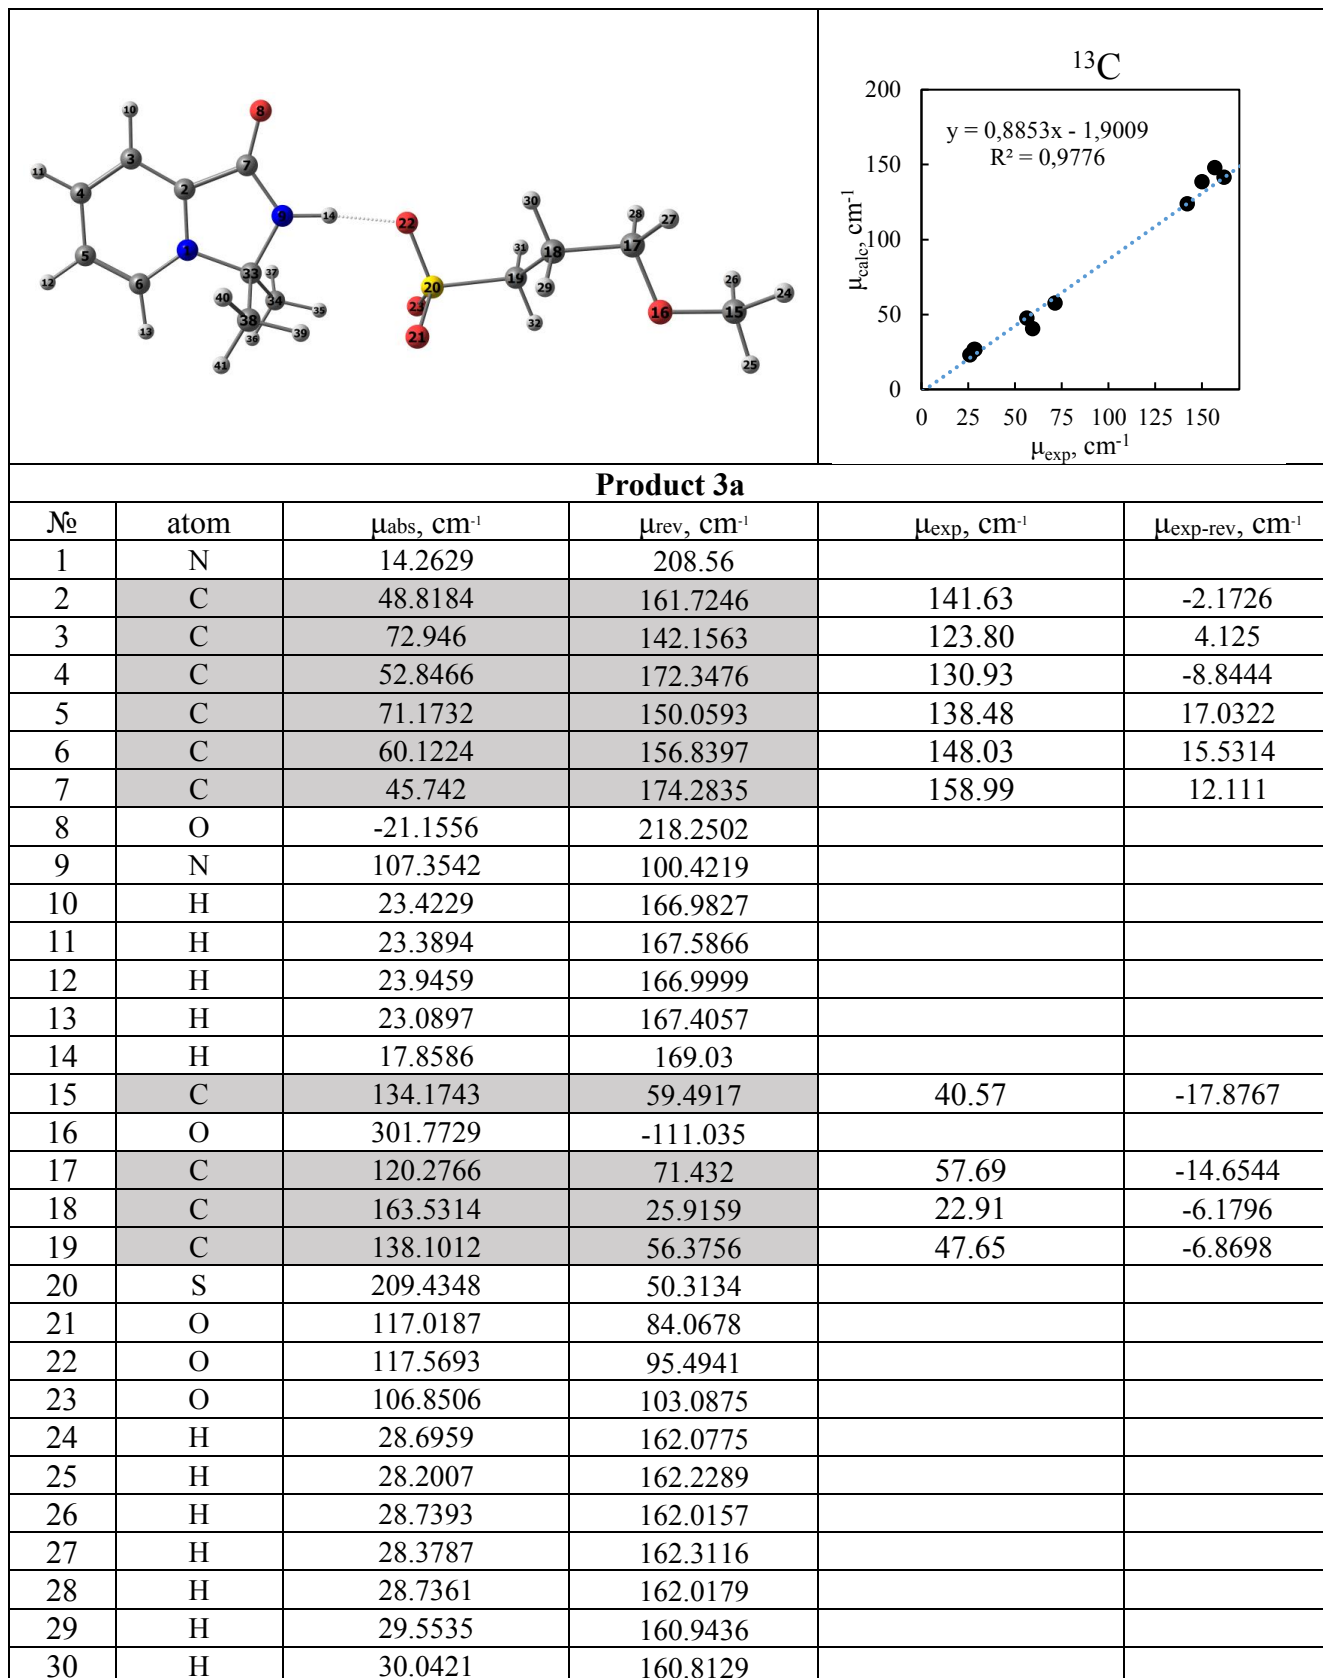

|    |   |          |          |       |  |
|----|---|----------|----------|-------|--|
| 31 | H | 29.5867  | 161.4196 |       |  |
| 32 | H | 28.887   | 161.8352 |       |  |
| 33 | C | 102.2389 | 90.0779  |       |  |
| 34 | C | 163.5571 | 28.6651  | 26.53 |  |
| 35 | H | 26.9261  | 161.5717 |       |  |
| 36 | H | 30.2939  | 160.5588 |       |  |
| 37 | H | 30.8508  | 159.8867 |       |  |
| 38 | C | 163.5755 | 28.027   | 26.53 |  |
| 39 | H | 26.9128  | 161.6211 |       |  |
| 40 | H | 30.8616  | 159.8739 |       |  |
| 41 | H | 30.3037  | 160.5459 |       |  |

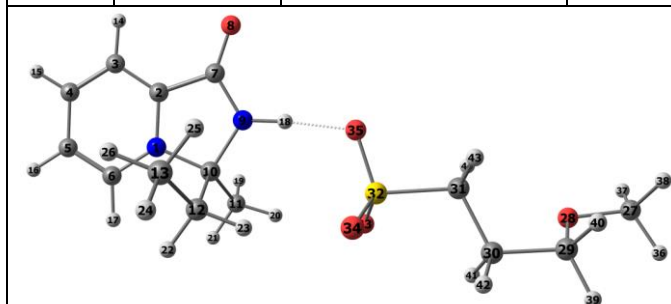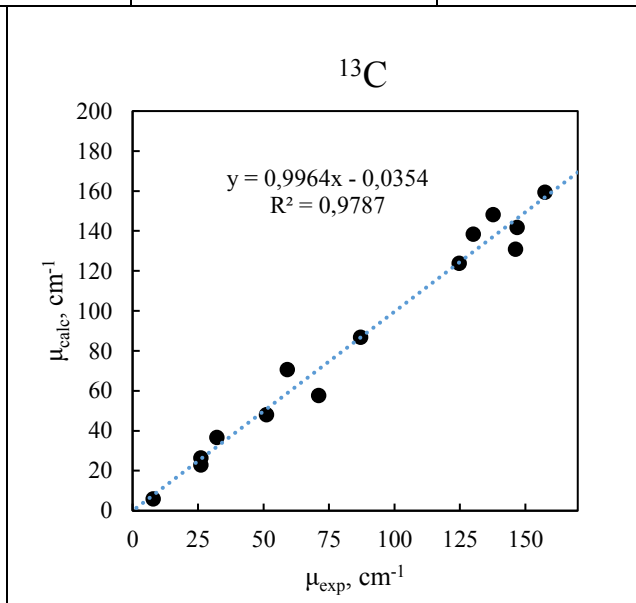

| Product 3b |      |                                    |                                    |                                    |                                        |
|------------|------|------------------------------------|------------------------------------|------------------------------------|----------------------------------------|
| No         | atom | $\mu_{\text{abs}}, \text{cm}^{-1}$ | $\mu_{\text{rev}}, \text{cm}^{-1}$ | $\mu_{\text{exp}}, \text{cm}^{-1}$ | $\mu_{\text{exp-rev}}, \text{cm}^{-1}$ |
| 1          | N    | 28.5962                            | 164.0248                           |                                    |                                        |
| 2          | C    | 45.8148                            | 146.8062                           | 141.79                             | -5.0162                                |
| 3          | C    | 67.8816                            | 124.7394                           | 123.94                             | -0.7994                                |
| 4          | C    | 46.4289                            | 146.1921                           | 131.01                             | -15.1821                               |
| 5          | C    | 62.5648                            | 130.0562                           | 138.54                             | 8.4838                                 |
| 6          | C    | 54.9268                            | 137.6942                           | 148.27                             | 10.5758                                |
| 7          | C    | 35.1659                            | 157.4551                           | 159.44                             | 1.9849                                 |
| 8          | O    | 12.0356                            | 180.5854                           |                                    |                                        |
| 9          | N    | 115.5449                           | 77.0761                            |                                    |                                        |
| 10         | C    | 105.5781                           | 87.0429                            | 86.95                              | -0.0929                                |
| 11         | C    | 166.5885                           | 26.0325                            | 26.43                              | 0.3975                                 |
| 12         | C    | 160.4506                           | 32.1704                            | 36.69                              | 4.5196                                 |
| 13         | C    | 184.7698                           | 7.85120                            | 5.99                               | -1.8612                                |
| 14         | H    | 23.1893                            | 169.4317                           |                                    |                                        |
| 15         | H    | 22.626                             | 169.995                            |                                    |                                        |
| 16         | H    | 23.1083                            | 169.5127                           |                                    |                                        |
| 17         | H    | 22.7997                            | 169.8213                           |                                    |                                        |
| 18         | H    | 20.7303                            | 171.8907                           |                                    |                                        |
| 19         | H    | 28.9863                            | 163.6347                           |                                    |                                        |
| 20         | H    | 27.4139                            | 165.2071                           |                                    |                                        |
| 21         | H    | 28.5737                            | 164.0473                           |                                    |                                        |
| 22         | H    | 28.2192                            | 164.4018                           |                                    |                                        |

|    |   |          |          |       |          |
|----|---|----------|----------|-------|----------|
| 23 | H | 26.9801  | 165.6409 |       |          |
| 24 | H | 29.0209  | 163.6001 |       |          |
| 25 | H | 28.8496  | 163.7714 |       |          |
| 26 | H | 29.9525  | 162.6685 |       |          |
| 27 | C | 133.5973 | 59.0237  | 70.64 | 11.6163  |
| 28 | O | 289.2235 | -96.6025 |       |          |
| 29 | C | 121.5668 | 71.0542  | 57.75 | -13.3042 |
| 30 | C | 166.566  | 26.055   | 22.97 | -3.085   |
| 31 | C | 141.5375 | 51.0835  | 48.03 | -3.0535  |
| 32 | S | 131.0959 | 61.5251  |       |          |
| 33 | O | 136.9628 | 55.6582  |       |          |
| 34 | O | 135.4536 | 57.1674  |       |          |
| 35 | O | 128.0845 | 64.5365  |       |          |
| 36 | H | 27.1062  | 165.5148 |       |          |
| 37 | H | 26.6789  | 165.9421 |       |          |
| 38 | H | 27.1709  | 165.4501 |       |          |
| 39 | H | 26.9389  | 165.6821 |       |          |
| 40 | H | 27.1688  | 165.4522 |       |          |
| 41 | H | 28.1127  | 164.5083 |       |          |
| 42 | H | 28.5692  | 164.0518 |       |          |
| 43 | H | 28.0343  | 164.5867 |       |          |
| 44 | H | 27.5334  | 165.0876 |       |          |

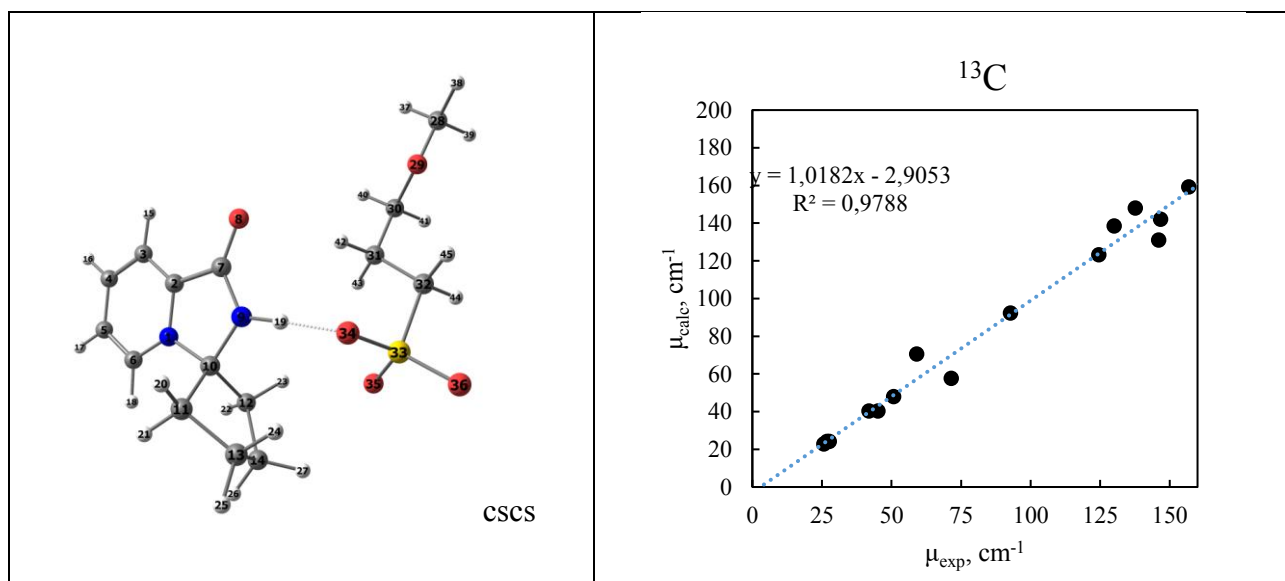

| Product 3d |      |                                    |                                    |                                    |                                        |
|------------|------|------------------------------------|------------------------------------|------------------------------------|----------------------------------------|
| No         | atom | $\mu_{\text{abs}}, \text{cm}^{-1}$ | $\mu_{\text{rev}}, \text{cm}^{-1}$ | $\mu_{\text{exp}}, \text{cm}^{-1}$ | $\mu_{\text{exp-rev}}, \text{cm}^{-1}$ |
| 1          | N    | 27.4131                            | 165.2079                           |                                    |                                        |
| 2          | C    | 45.8821                            | 146.7389                           | 142.18                             | -4.5589                                |
| 3          | C    | 68.1328                            | 124.4882                           | 123.29                             | -1.1982                                |
| 4          | C    | 46.5597                            | 146.0613                           | 131.00                             | -15.0613                               |
| 5          | C    | 62.5971                            | 130.0239                           | 138.51                             | 8.4861                                 |
| 6          | C    | 54.9552                            | 137.6658                           | 148.11                             | 10.4442                                |
| 7          | C    | 35.7486                            | 156.8724                           | 159.20                             | 2.3276                                 |

|    |   |          |          |       |          |
|----|---|----------|----------|-------|----------|
| 8  | O | 15.0109  | 177.6101 |       |          |
| 9  | N | 100.5096 | 92.1114  |       |          |
| 10 | C | 99.9006  | 92.7204  | 92.40 | -0.3204  |
| 11 | C | 147.5018 | 45.1192  | 40.33 | -4.7892  |
| 12 | C | 150.7368 | 41.8842  | 40.33 | -1.5542  |
| 13 | C | 164.9266 | 27.6944  | 24.16 | -3.5344  |
| 14 | C | 165.7254 | 26.8956  | 24.16 | -2.7356  |
| 15 | H | 23.2304  | 169.3906 |       |          |
| 16 | H | 22.6868  | 169.9342 |       |          |
| 17 | H | 23.1699  | 169.4511 |       |          |
| 18 | H | 22.7776  | 169.8434 |       |          |
| 19 | H | 19.7796  | 172.8414 |       |          |
| 20 | H | 28.2237  | 164.3973 |       |          |
| 21 | H | 27.933   | 164.688  |       |          |
| 22 | H | 28.4473  | 164.1737 |       |          |
| 23 | H | 27.5697  | 165.0513 |       |          |
| 24 | H | 27.5616  | 165.0594 |       |          |
| 25 | H | 28.2529  | 164.3681 |       |          |
| 26 | H | 28.2238  | 164.3972 |       |          |
| 27 | H | 28.0138  | 164.6072 |       |          |
| 28 | C | 133.5814 | 59.0396  | 70.64 | 11.6004  |
| 29 | O | 288.8086 | -96.1876 |       |          |
| 30 | C | 121.1887 | 71.4323  | 57.75 | -13.6823 |
| 31 | C | 166.9234 | 25.6976  | 22.80 | -2.8976  |
| 32 | C | 141.8817 | 50.7393  | 47.93 | -2.8093  |
| 33 | S | 130.0256 | 62.5954  |       |          |
| 34 | O | 127.2674 | 65.3536  |       |          |
| 35 | O | 141.7586 | 50.8624  |       |          |
| 36 | O | 139.541  | 53.08    |       |          |
| 37 | H | 27.1032  | 165.5178 |       |          |
| 38 | H | 26.6691  | 165.9519 |       |          |
| 39 | H | 27.1881  | 165.4329 |       |          |
| 40 | H | 27.0292  | 165.5918 |       |          |
| 41 | H | 27.224   | 165.397  |       |          |
| 42 | H | 27.7468  | 164.8742 |       |          |
| 43 | H | 28.9057  | 163.7153 |       |          |
| 44 | H | 28.2323  | 164.3887 |       |          |
| 45 | H | 27.6256  | 164.9954 |       |          |

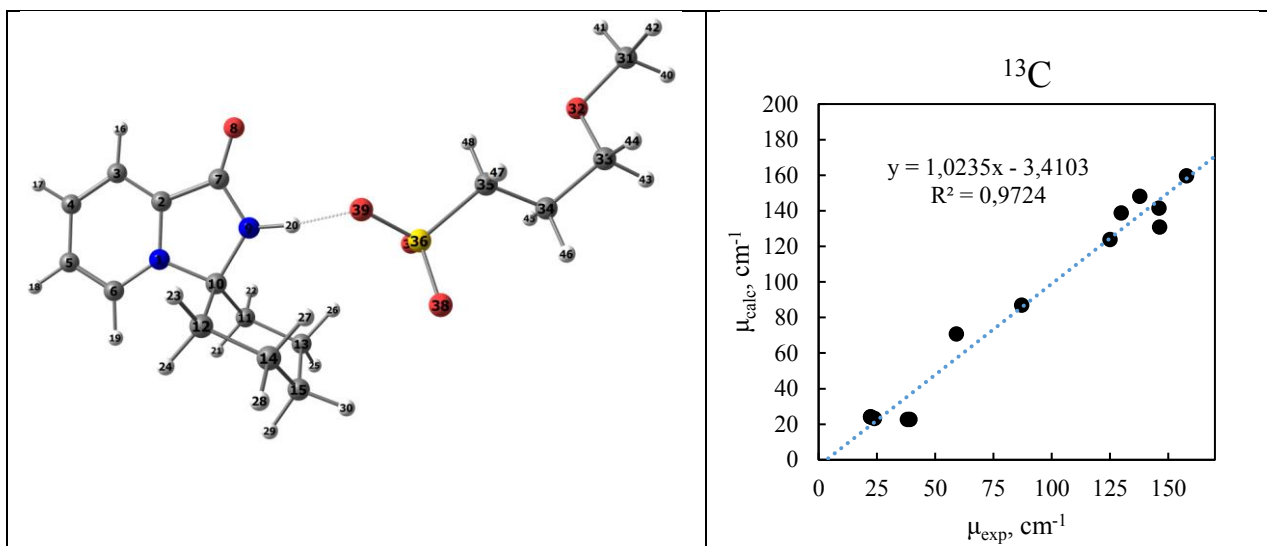

| Product 3e |      |                                    |                                    |                                    |                                        |
|------------|------|------------------------------------|------------------------------------|------------------------------------|----------------------------------------|
| No         | atom | $\mu_{\text{abs}}, \text{cm}^{-1}$ | $\mu_{\text{rev}}, \text{cm}^{-1}$ | $\mu_{\text{exp}}, \text{cm}^{-1}$ | $\mu_{\text{exp-rev}}, \text{cm}^{-1}$ |
| 1          | N    | 24.5032                            | 168.1178                           |                                    |                                        |
| 2          | C    | 46.6028                            | 146.0182                           | 141.48                             | -4.5382                                |
| 3          | C    | 67.6819                            | 124.9391                           | 123.87                             | -1.0691                                |
| 4          | C    | 46.344                             | 146.277                            | 130.84                             | -15.437                                |
| 5          | C    | 62.8485                            | 129.7725                           | 138.67                             | 8.8975                                 |
| 6          | C    | 54.8047                            | 137.8163                           | 148.11                             | 10.2937                                |
| 7          | C    | 34.778                             | 157.843                            | 159.64                             | 1.797                                  |
| 8          | O    | 7.7969                             | 184.8241                           |                                    |                                        |
| 9          | N    | 110.8246                           | 81.7964                            |                                    |                                        |
| 10         | C    | 105.5261                           | 87.0949                            | 86.88                              | -0.2149                                |
| 11         | C    | 153.5085                           | 39.1125                            | 22.57                              | -16.5425                               |
| 12         | C    | 154.4956                           | 38.1254                            | 22.57                              | -15.5554                               |
| 13         | C    | 170.3595                           | 22.2615                            | 24.17                              | 1.9085                                 |
| 14         | C    | 170.3464                           | 22.2746                            | 24.17                              | 1.8954                                 |
| 15         | C    | 168.7324                           | 23.8886                            | 23.17                              | -0.7186                                |
| 16         | H    | 23.1938                            | 169.4272                           |                                    |                                        |
| 17         | H    | 22.6525                            | 169.9685                           |                                    |                                        |
| 18         | H    | 23.1644                            | 169.4566                           |                                    |                                        |
| 19         | H    | 22.8084                            | 169.8126                           |                                    |                                        |
| 20         | H    | 19.9459                            | 172.6751                           |                                    |                                        |
| 21         | H    | 28.1228                            | 164.4982                           |                                    |                                        |
| 22         | H    | 28.5236                            | 164.0974                           |                                    |                                        |
| 23         | H    | 28.5355                            | 164.0855                           |                                    |                                        |
| 24         | H    | 28.1012                            | 164.5198                           |                                    |                                        |
| 25         | H    | 28.5067                            | 164.1143                           |                                    |                                        |
| 26         | H    | 27.6723                            | 164.9487                           |                                    |                                        |
| 27         | H    | 27.5891                            | 165.0319                           |                                    |                                        |
| 28         | H    | 28.5275                            | 164.0935                           |                                    |                                        |
| 29         | H    | 28.474                             | 164.147                            |                                    |                                        |
| 30         | H    | 28.2932                            | 164.3278                           |                                    |                                        |
| 31         | C    | 133.5856                           | 59.0354                            | 70.65                              | 11.6146                                |
| 32         | O    | 289.1872                           | -96.5662                           |                                    |                                        |
| 33         | C    | 121.5032                           | 71.1178                            | 57.75                              | -13.3678                               |

|    |   |          |          |       |         |
|----|---|----------|----------|-------|---------|
| 34 | C | 166.469  | 26.152   | 22.98 | -3.172  |
| 35 | C | 141.2344 | 51.3866  | 47.94 | -3.4466 |
| 36 | S | 133.8927 | 58.7283  |       |         |
| 37 | O | 134.6961 | 57.9249  |       |         |
| 38 | O | 137.0339 | 55.5871  |       |         |
| 39 | O | 123.4072 | 69.2138  |       |         |
| 40 | H | 27.0945  | 165.5265 |       |         |
| 41 | H | 26.6589  | 165.9621 |       |         |
| 42 | H | 27.1601  | 165.4609 |       |         |
| 43 | H | 26.9322  | 165.6888 |       |         |
| 44 | H | 27.1636  | 165.4574 |       |         |
| 45 | H | 28.1051  | 164.5159 |       |         |
| 46 | H | 28.5806  | 164.0404 |       |         |
| 47 | H | 28.0226  | 164.5984 |       |         |
| 48 | H | 27.4992  | 165.1218 |       |         |

**Table S6. The characteristics of hydrogen bonds in 2a [ $\text{\AA}$  and  $^\circ$ ]**

| D—H $\cdots$ A                         | D—H ( $\text{\AA}$ ) | H $\cdots$ A ( $\text{\AA}$ ) | D $\cdots$ A ( $\text{\AA}$ ) | D—H $\cdots$ A $^\circ$ |
|----------------------------------------|----------------------|-------------------------------|-------------------------------|-------------------------|
| N2A—H2A $\cdots$ O4                    | 0.88                 | 1.95                          | 2.735(5)                      | 147.4                   |
| N1B—<br>H1BB <sup>1</sup> $\cdots$ O2A | 0.88                 | 2.02                          | 2.881(5)                      | 164.5                   |
| N2B—H2B $\cdots$ O4A                   | 0.88                 | 1.92                          | 2.697(5)                      | 146.4                   |
| N2—H2 $\cdots$ O7B                     | 0.88                 | 1.95                          | 2.730(5)                      | 146.7                   |
| N2C—H2C $\cdots$ O7C                   | 0.88                 | 1.92                          | 2.698(5)                      | 146.4                   |
| N1C—<br>H1CB <sup>2</sup> $\cdots$ O2C | 0.88                 | 2.05                          | 2.883(5)                      | 164.3                   |

The atoms are obtained by symmetry transformations (1) —  $-1 + x, y, z$ ; (2) —  $1 + x, y, z$ .

**Table S7. The characteristics of hydrogen bonds in 3a [ $\text{\AA}$  and  $^\circ$ ]**

| D—H $\cdots$ A                 | D—H ( $\text{\AA}$ ) | H $\cdots$ A ( $\text{\AA}$ ) | D $\cdots$ A ( $\text{\AA}$ ) | D—H $\cdots$ A $^\circ$ |
|--------------------------------|----------------------|-------------------------------|-------------------------------|-------------------------|
| N2—H2 <sup>1</sup> $\cdots$ O1 | 0.88                 | 1.94                          | 2.730(4)                      | 148.8                   |



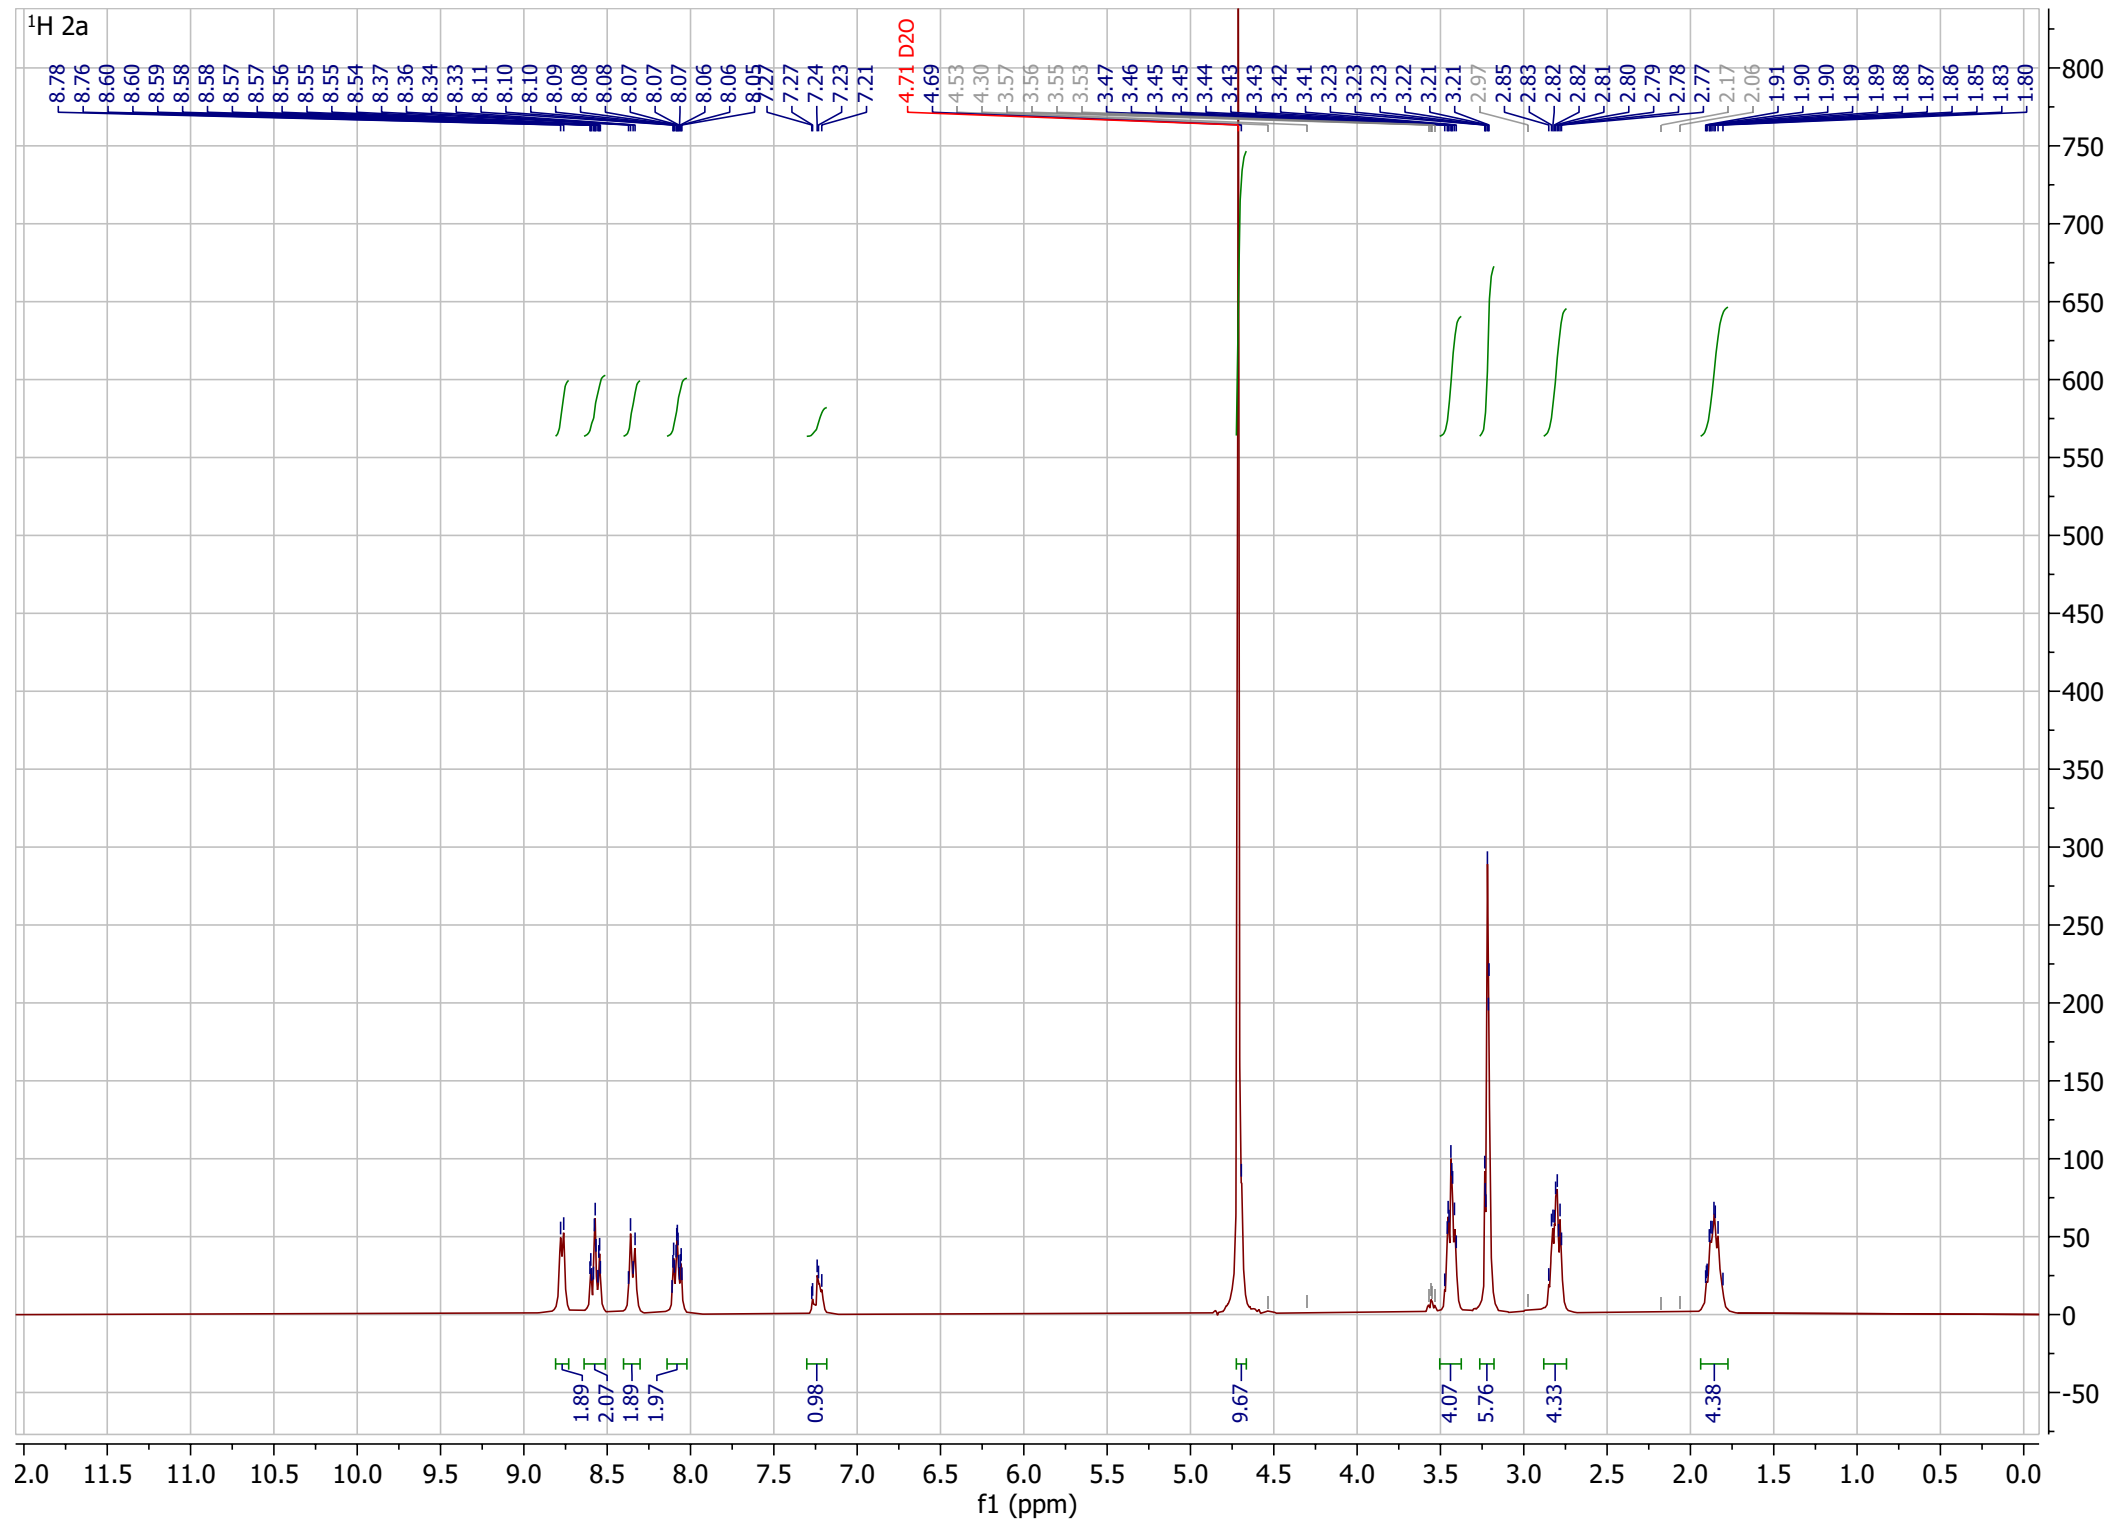

<sup>13</sup>C 2a

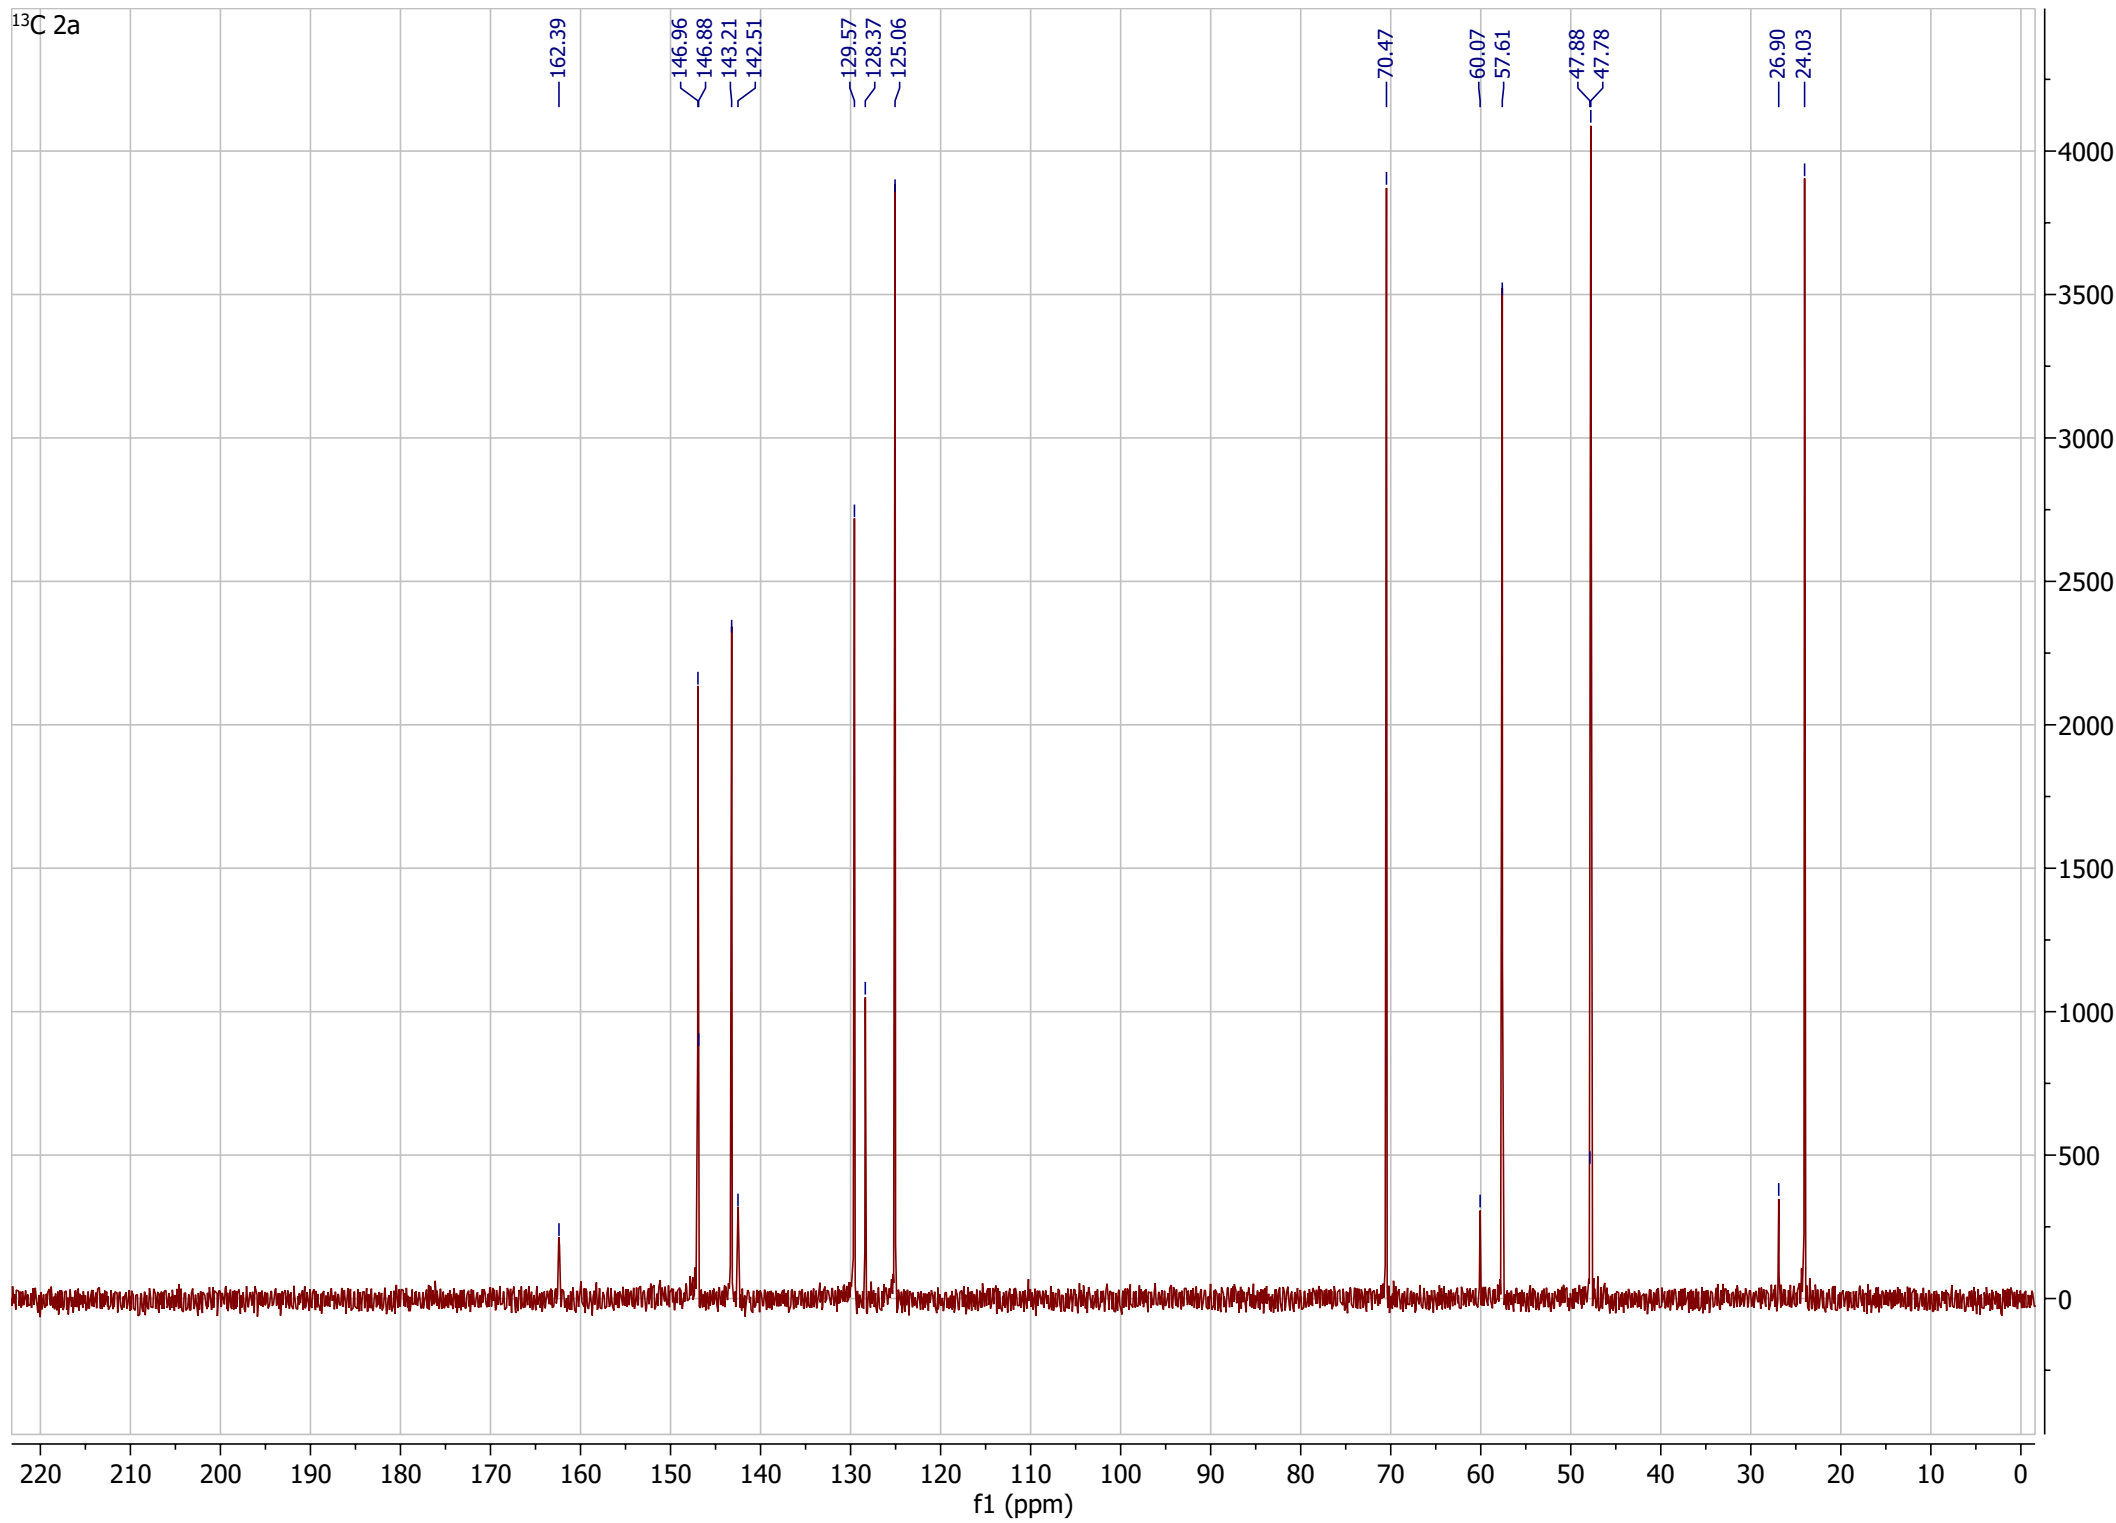

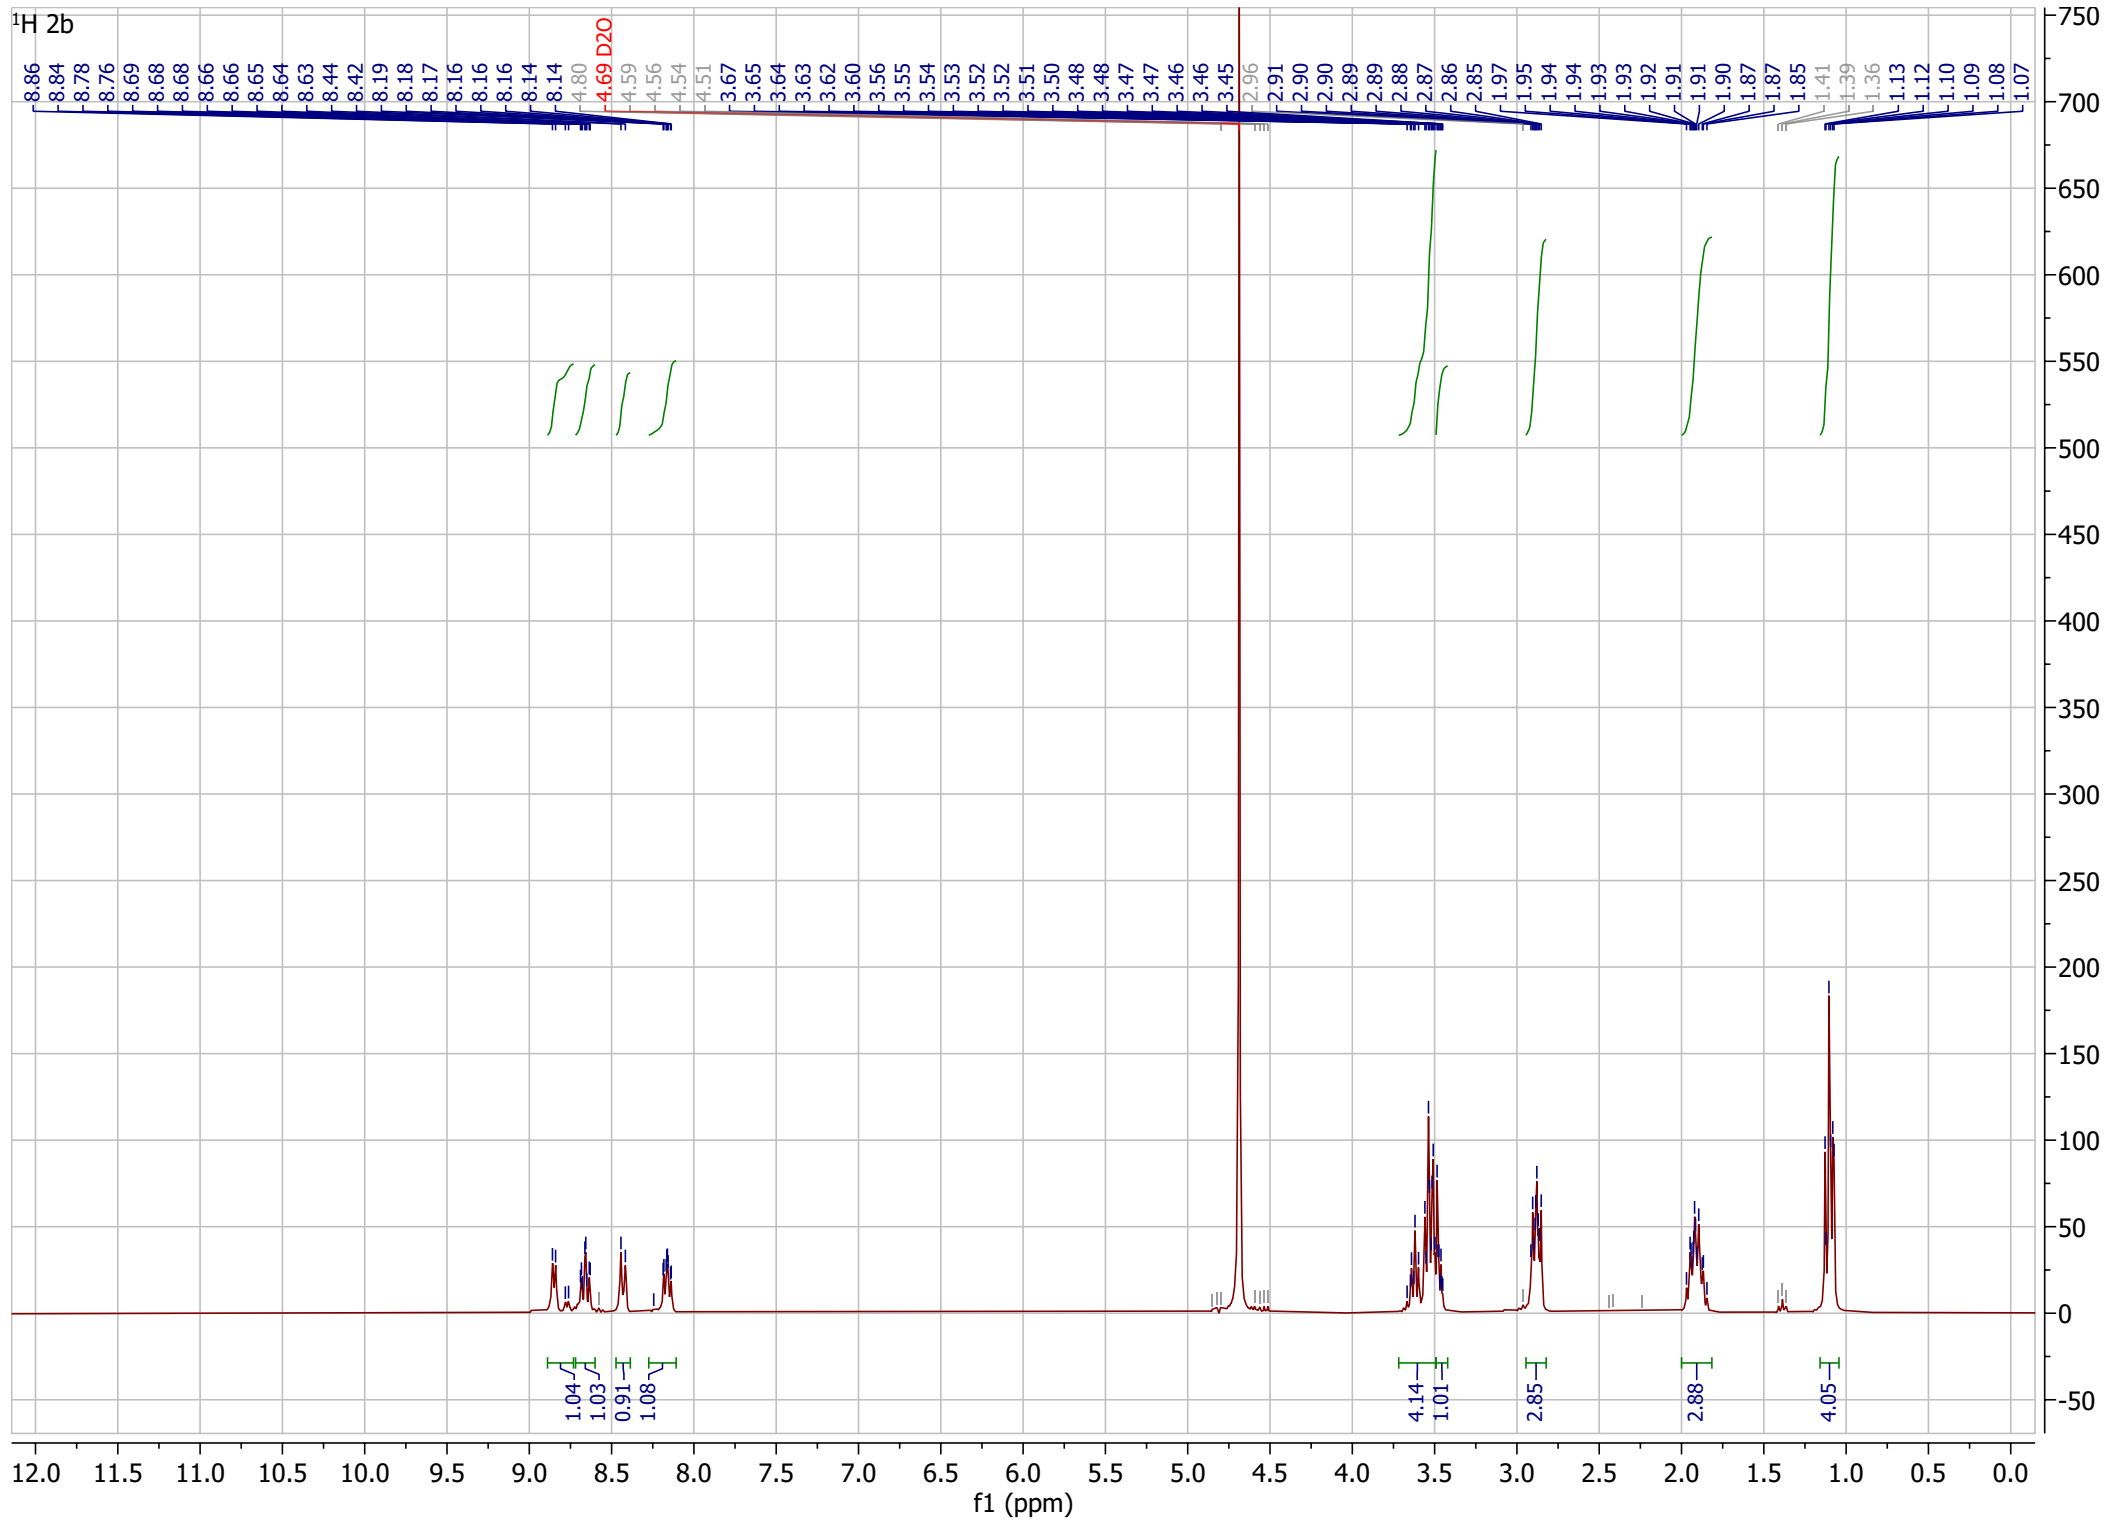

<sup>13</sup>C 2b

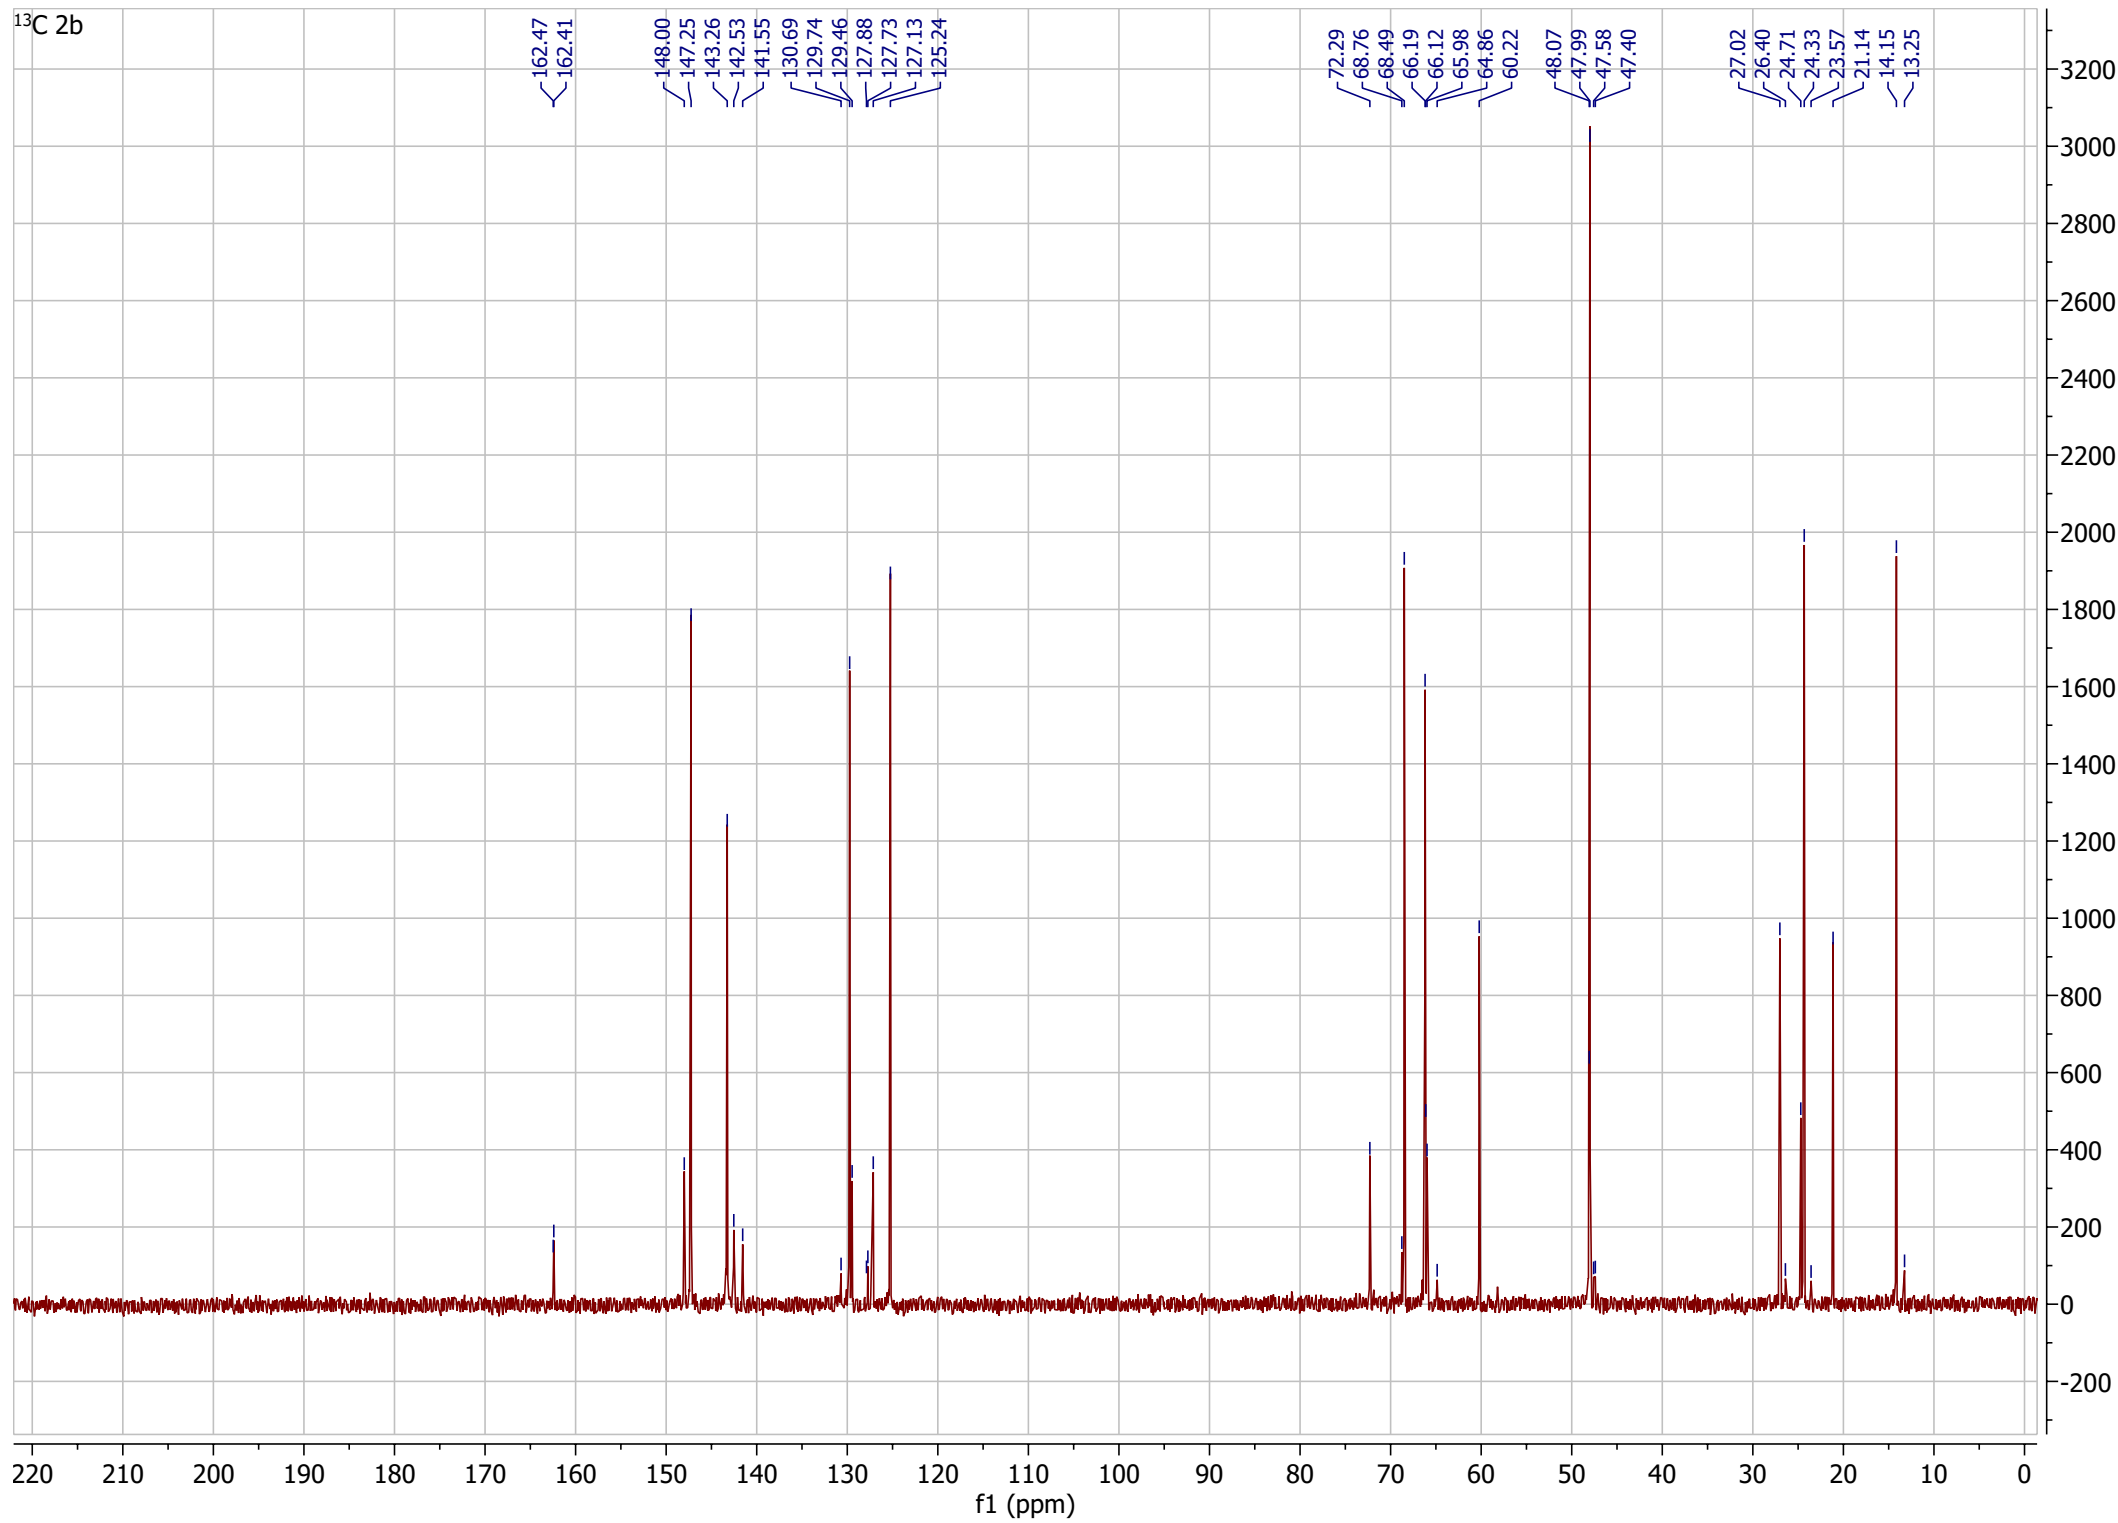

<sup>1</sup>H 2c

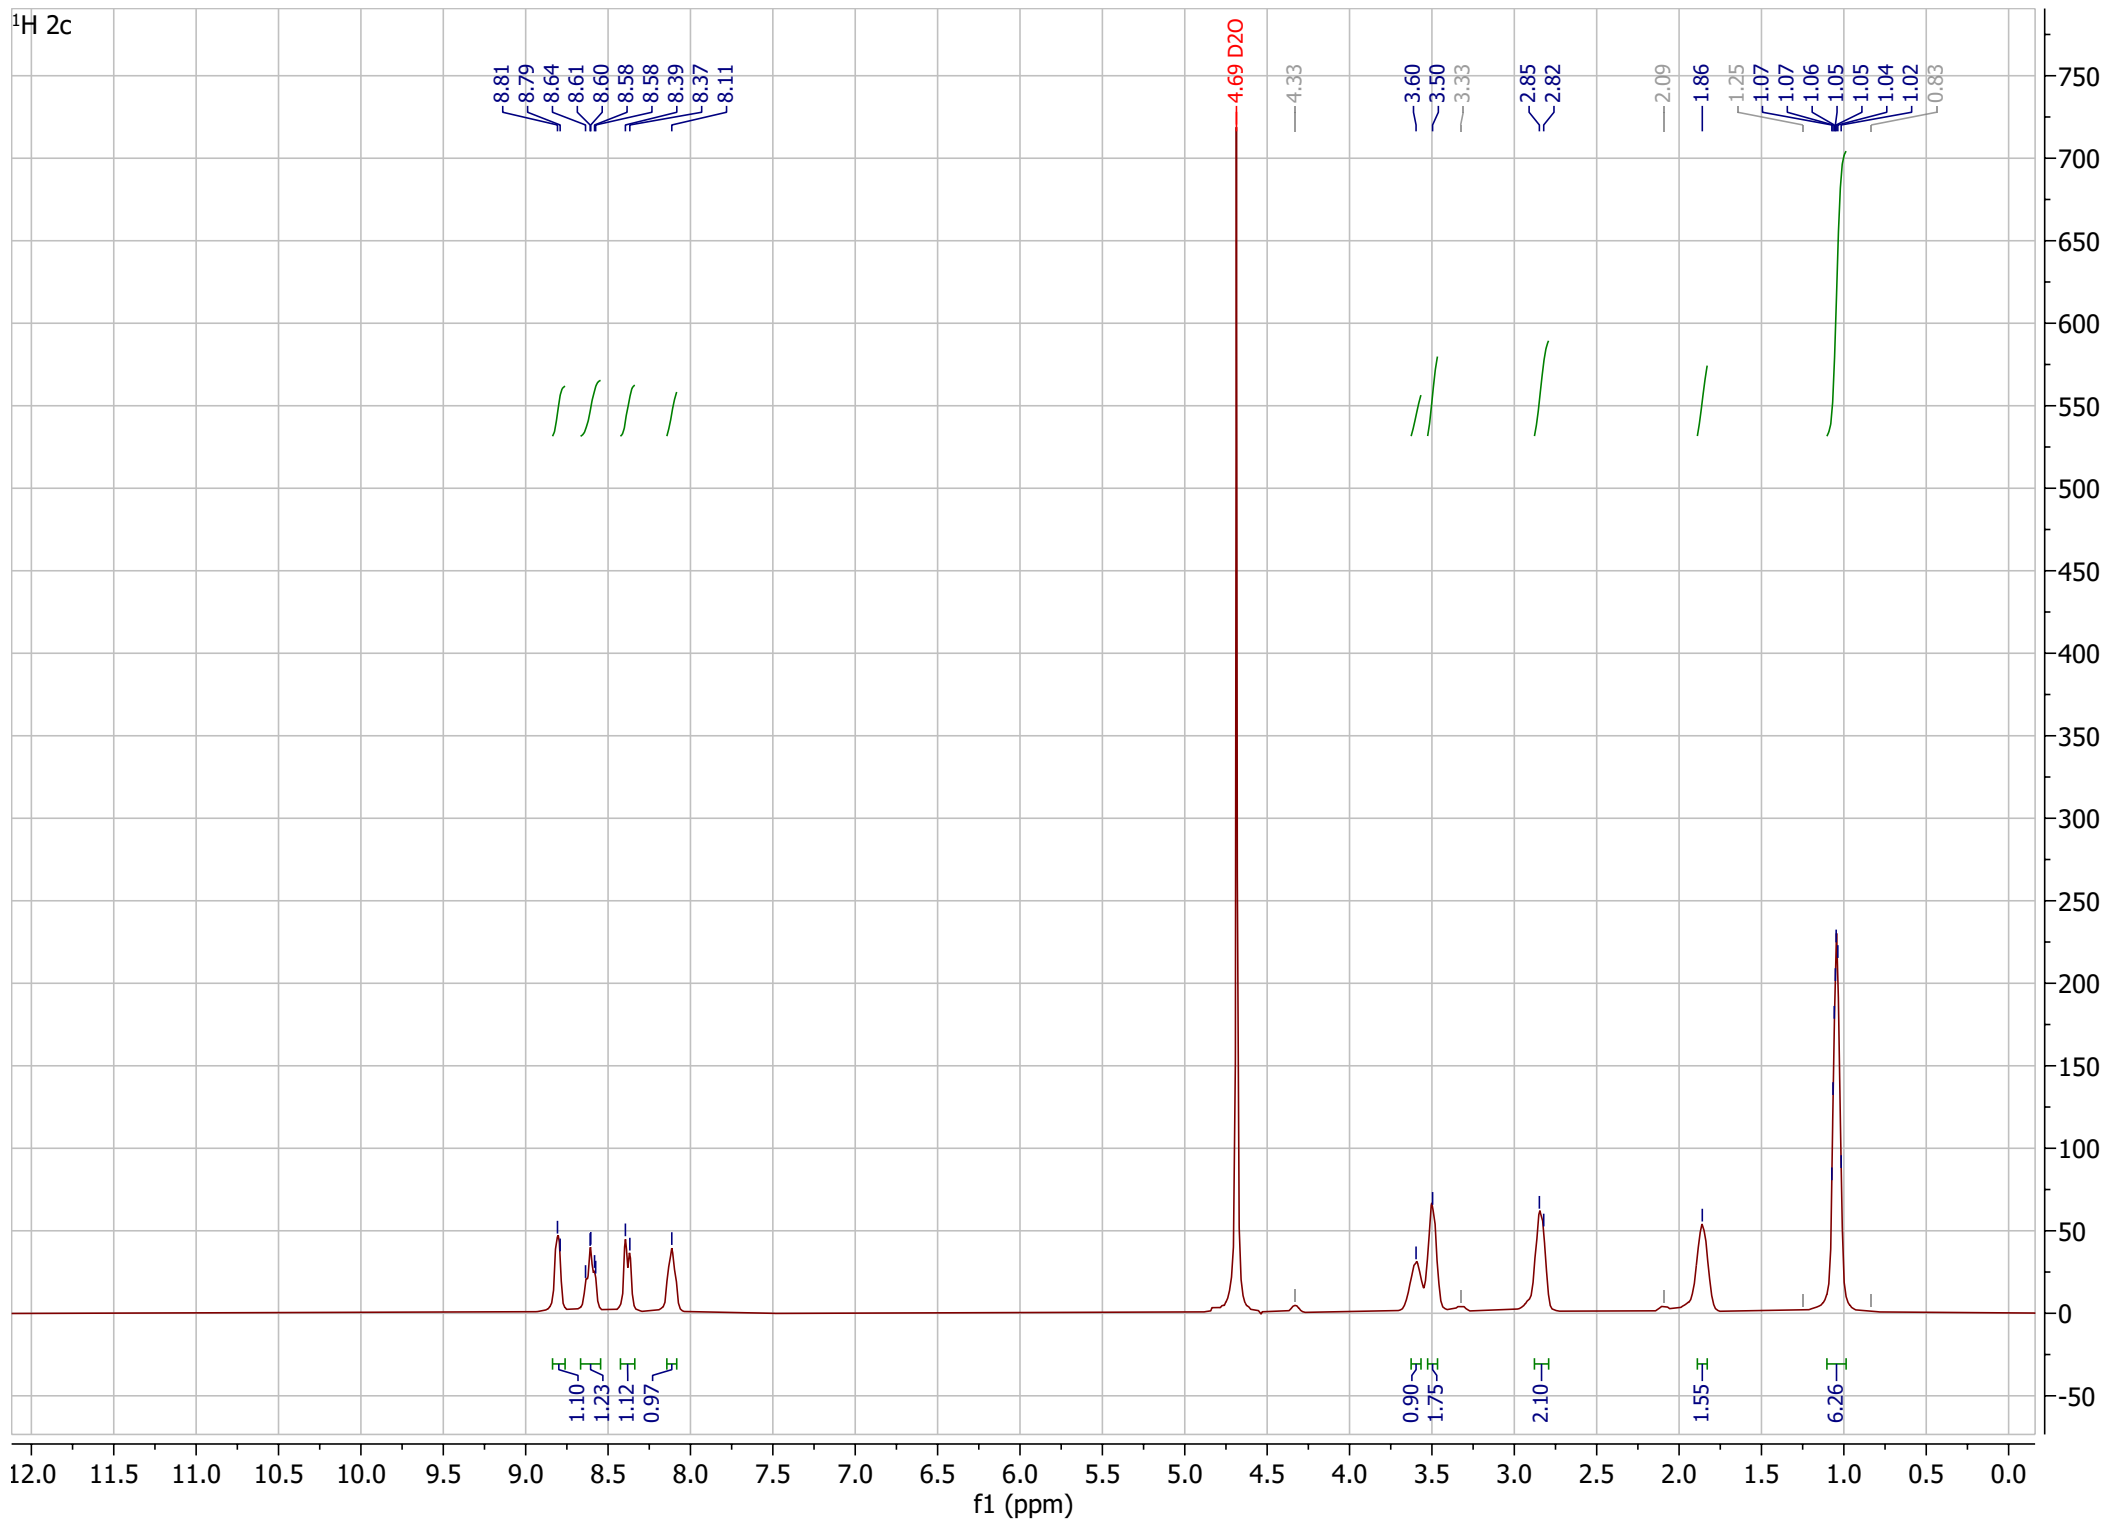

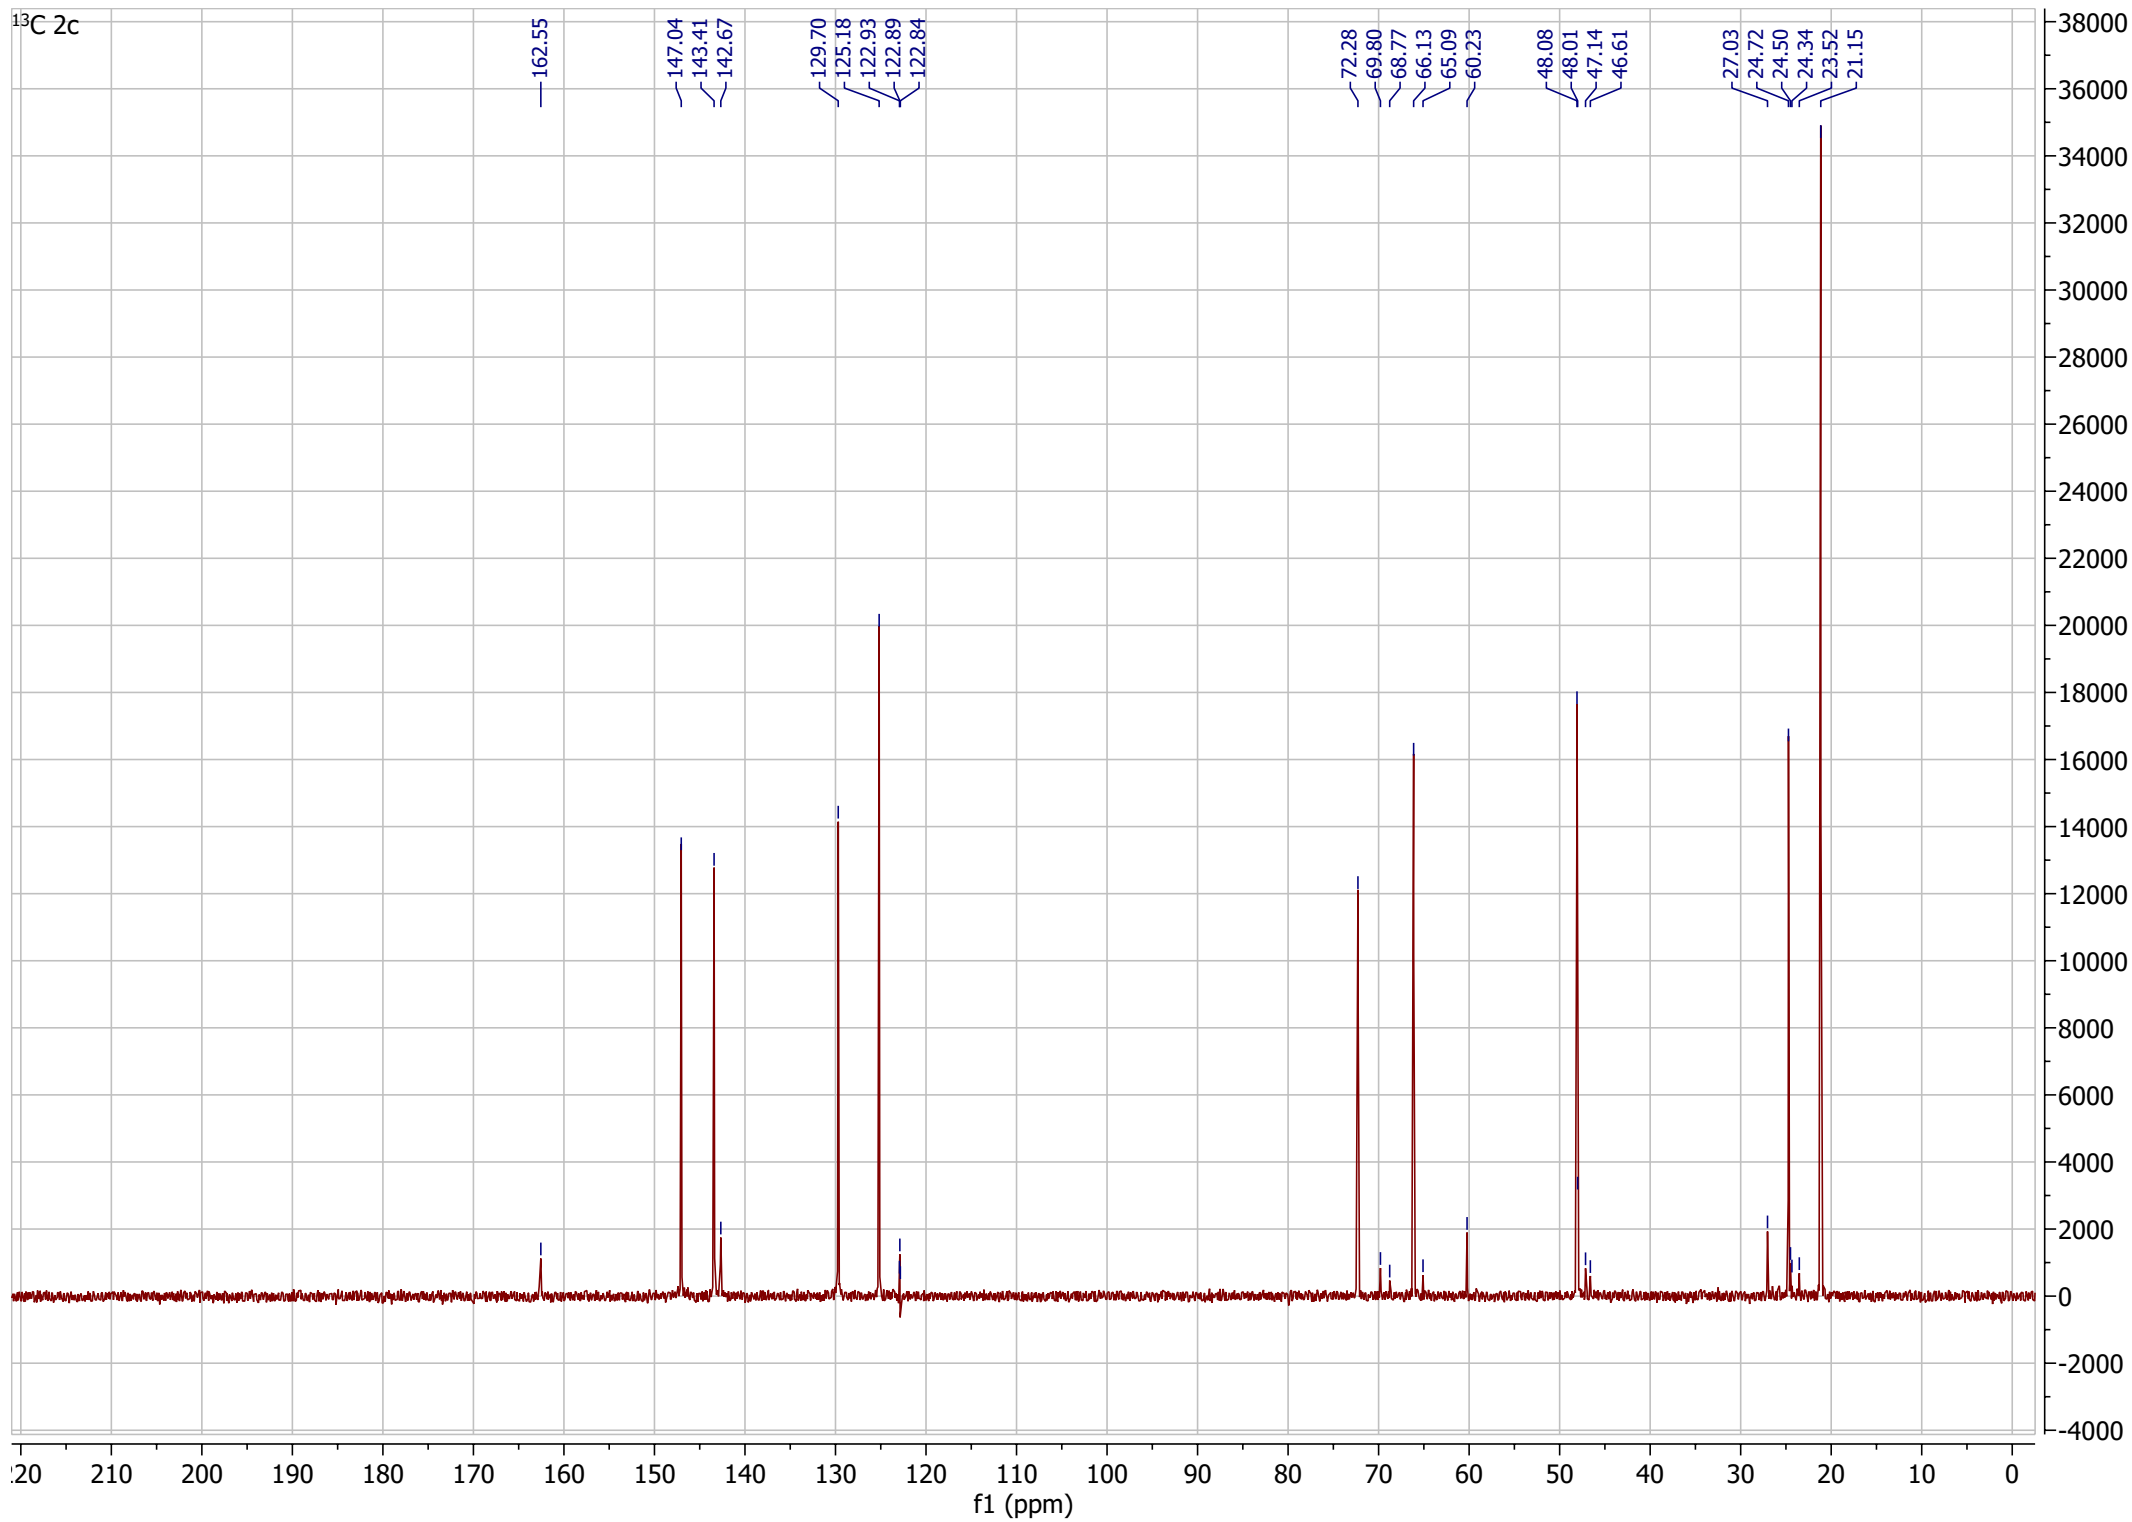

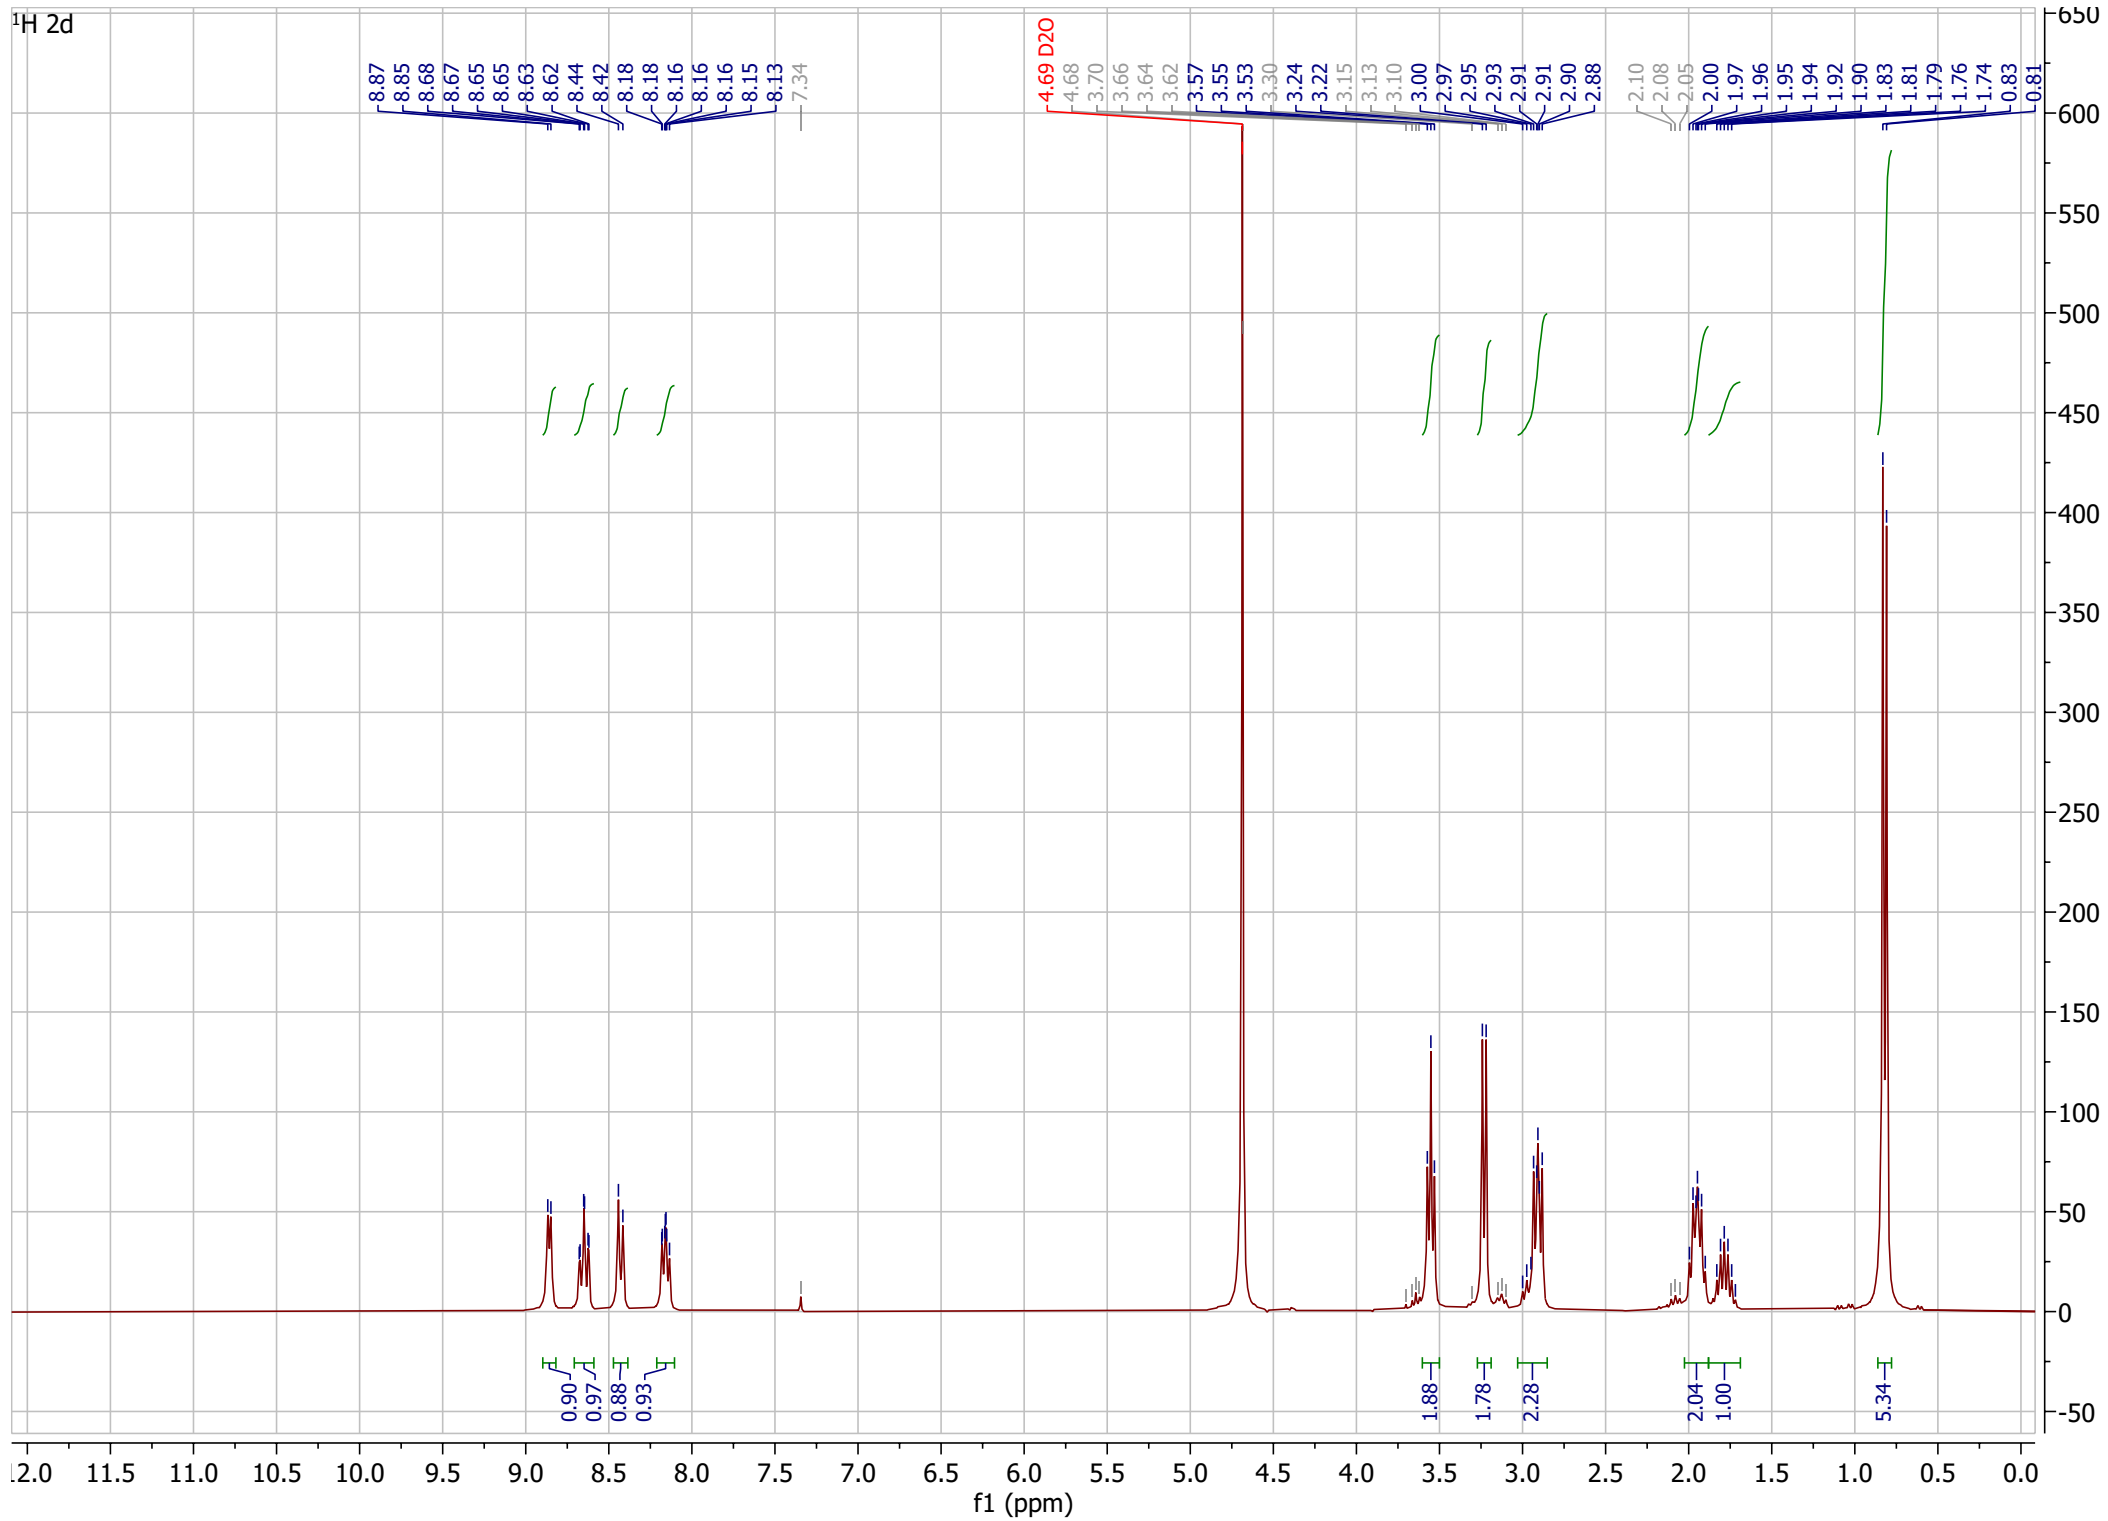

<sup>13</sup>C 2d

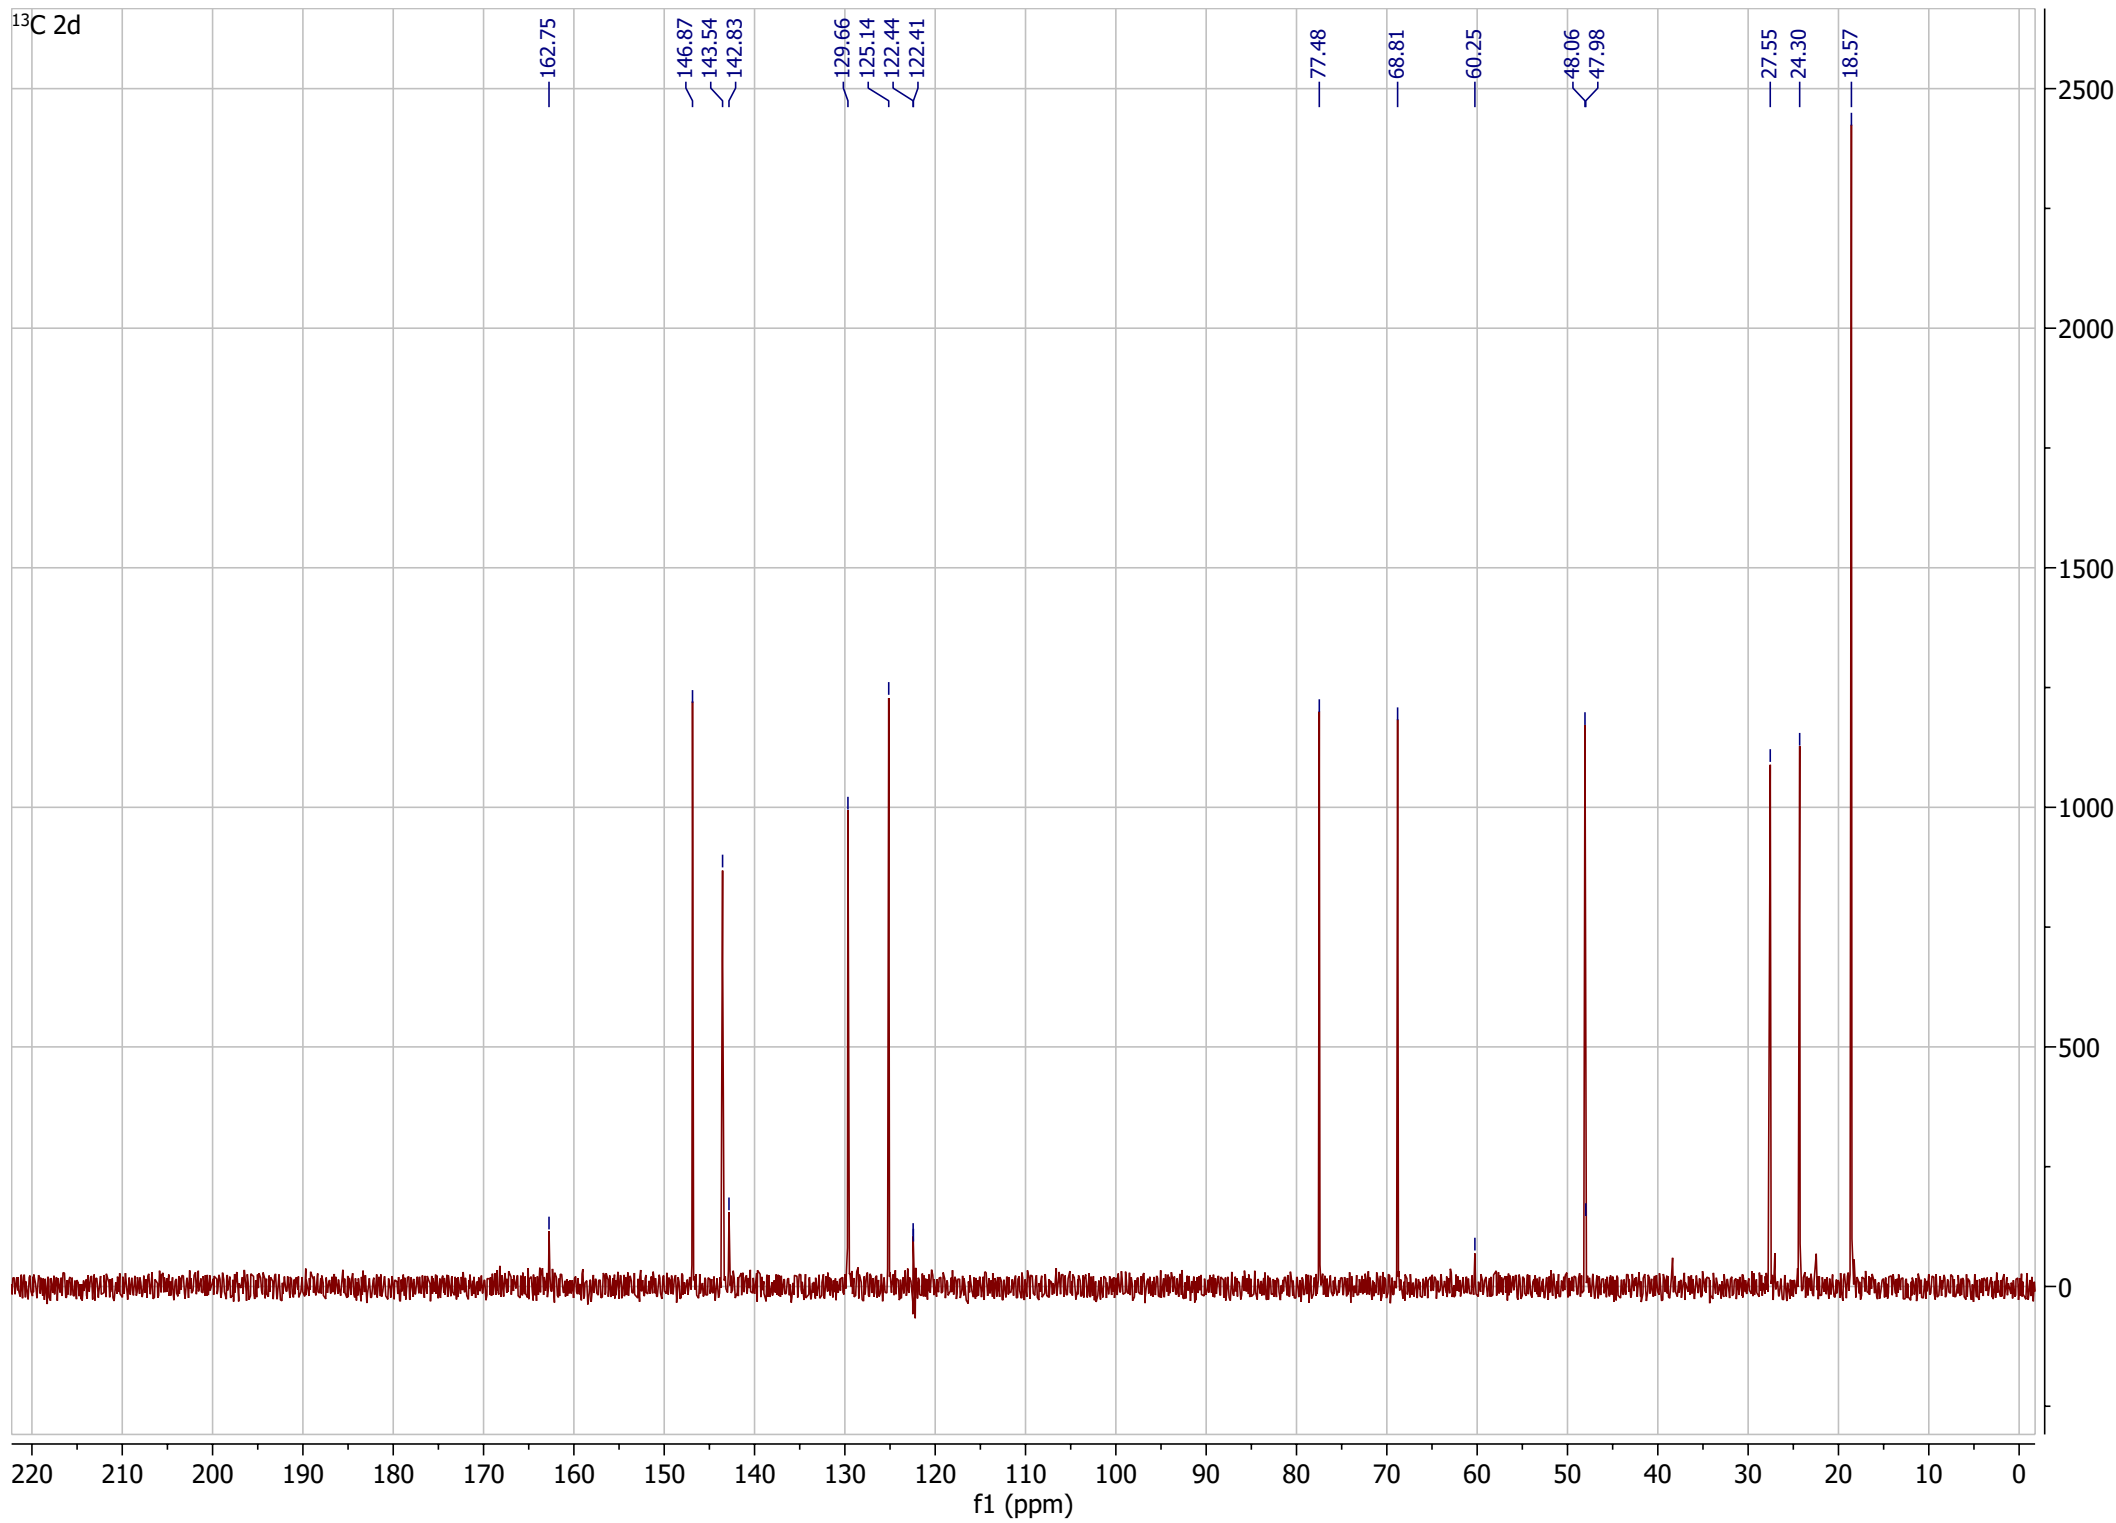



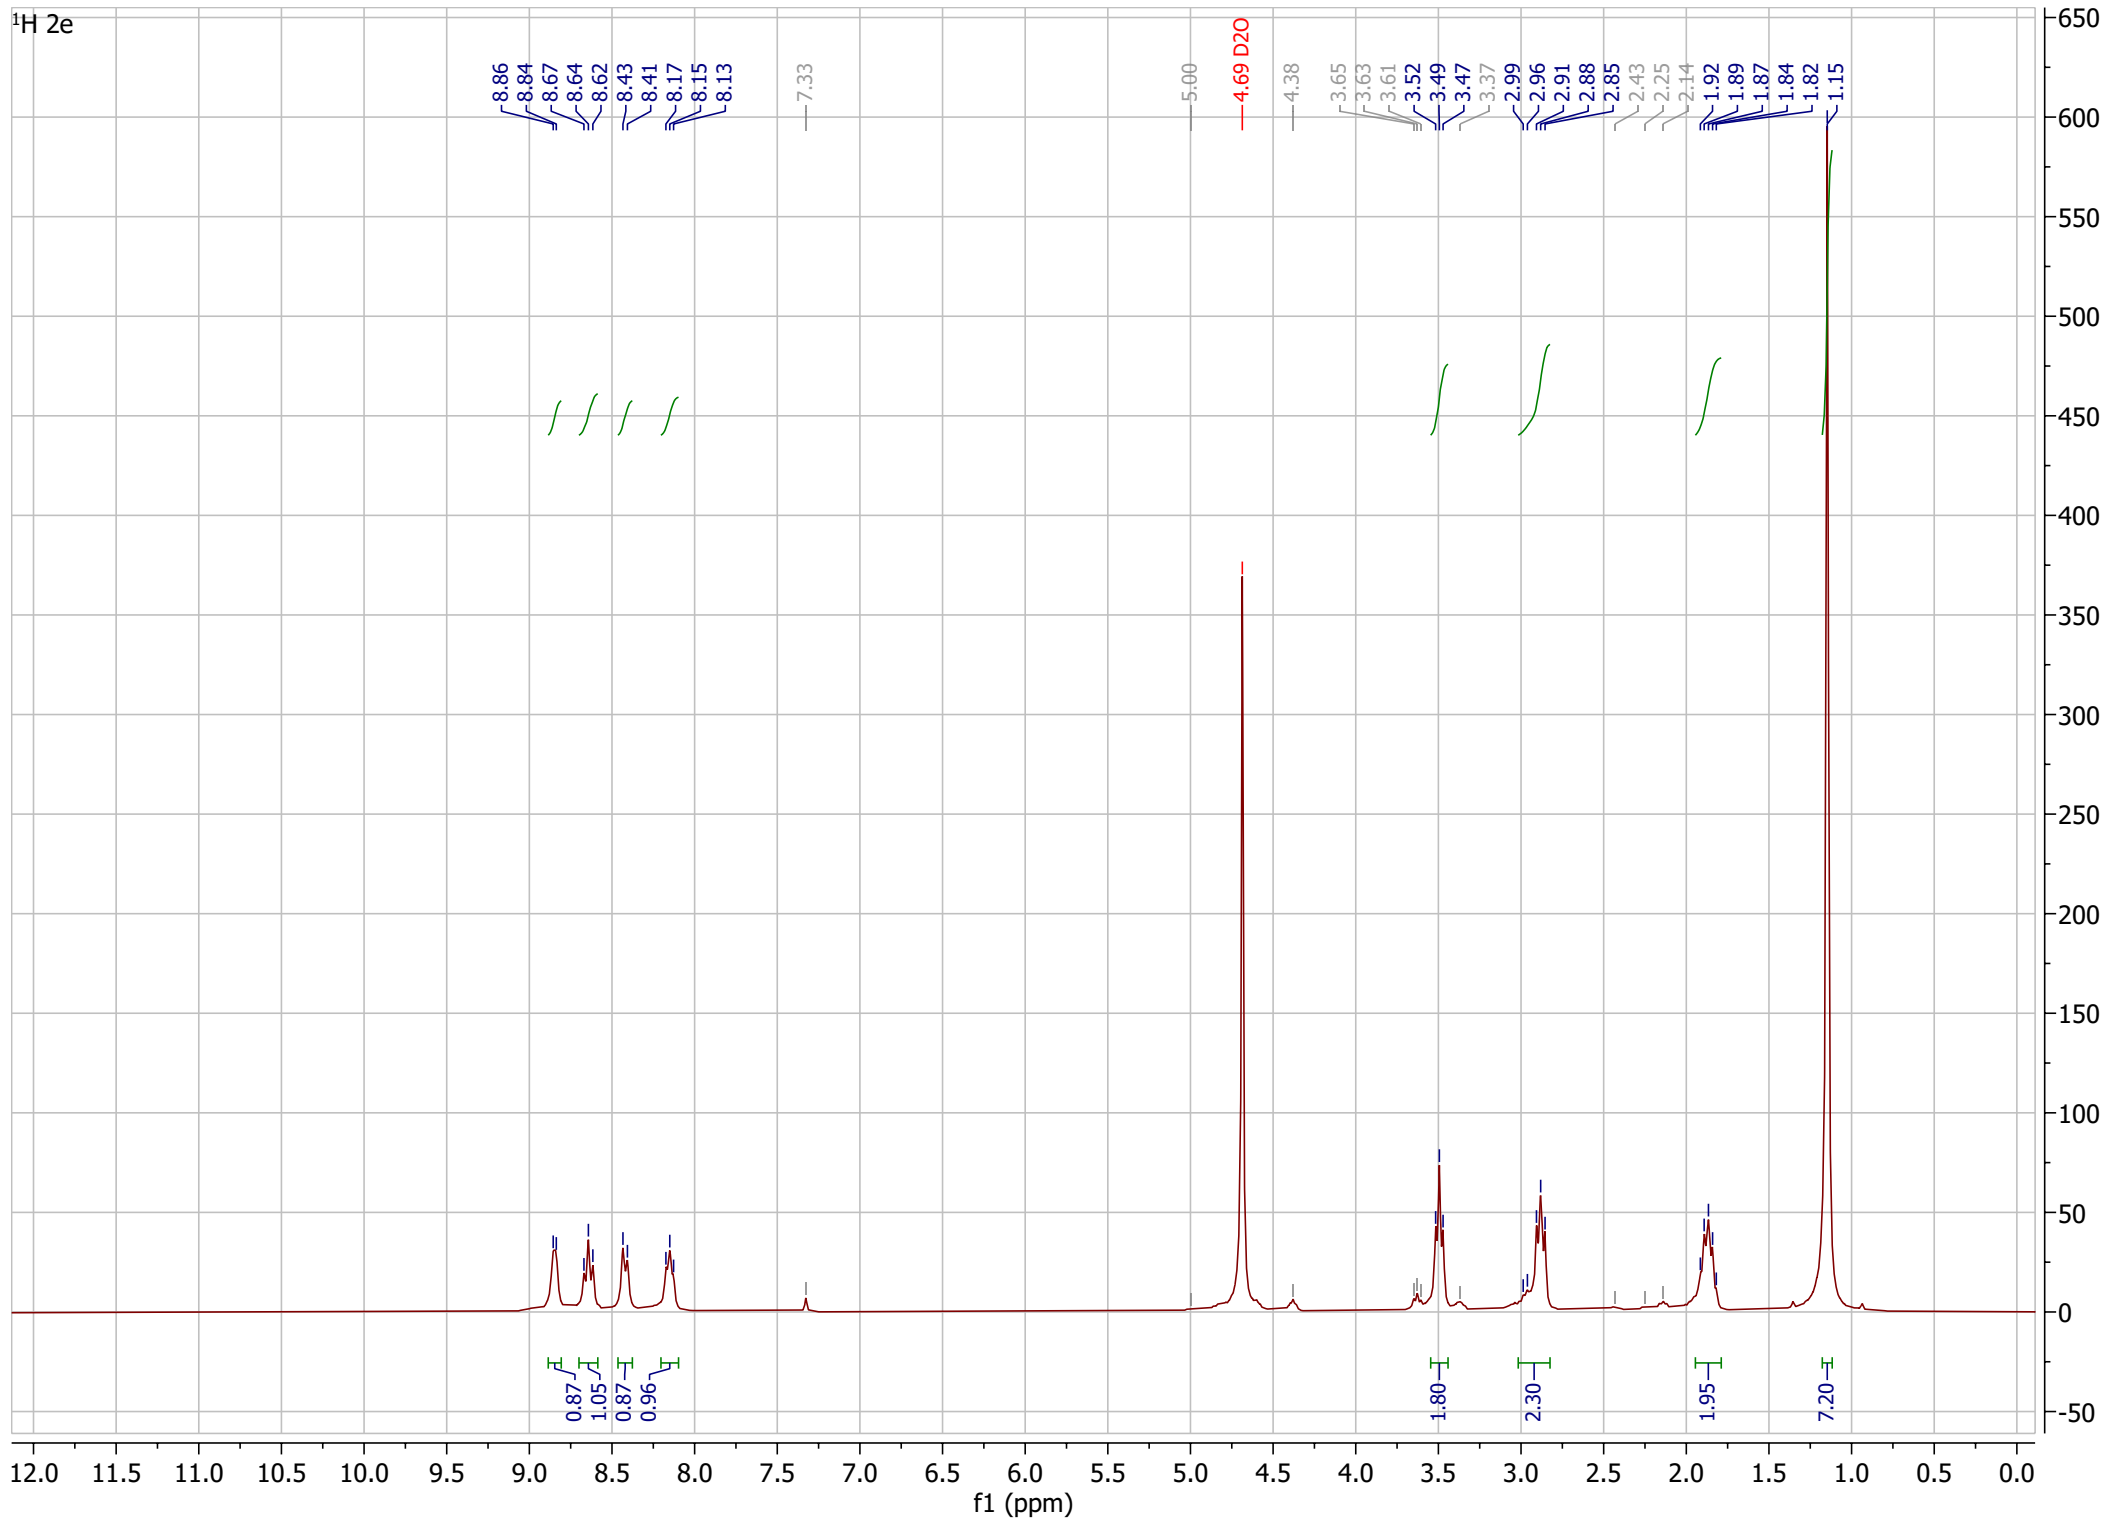

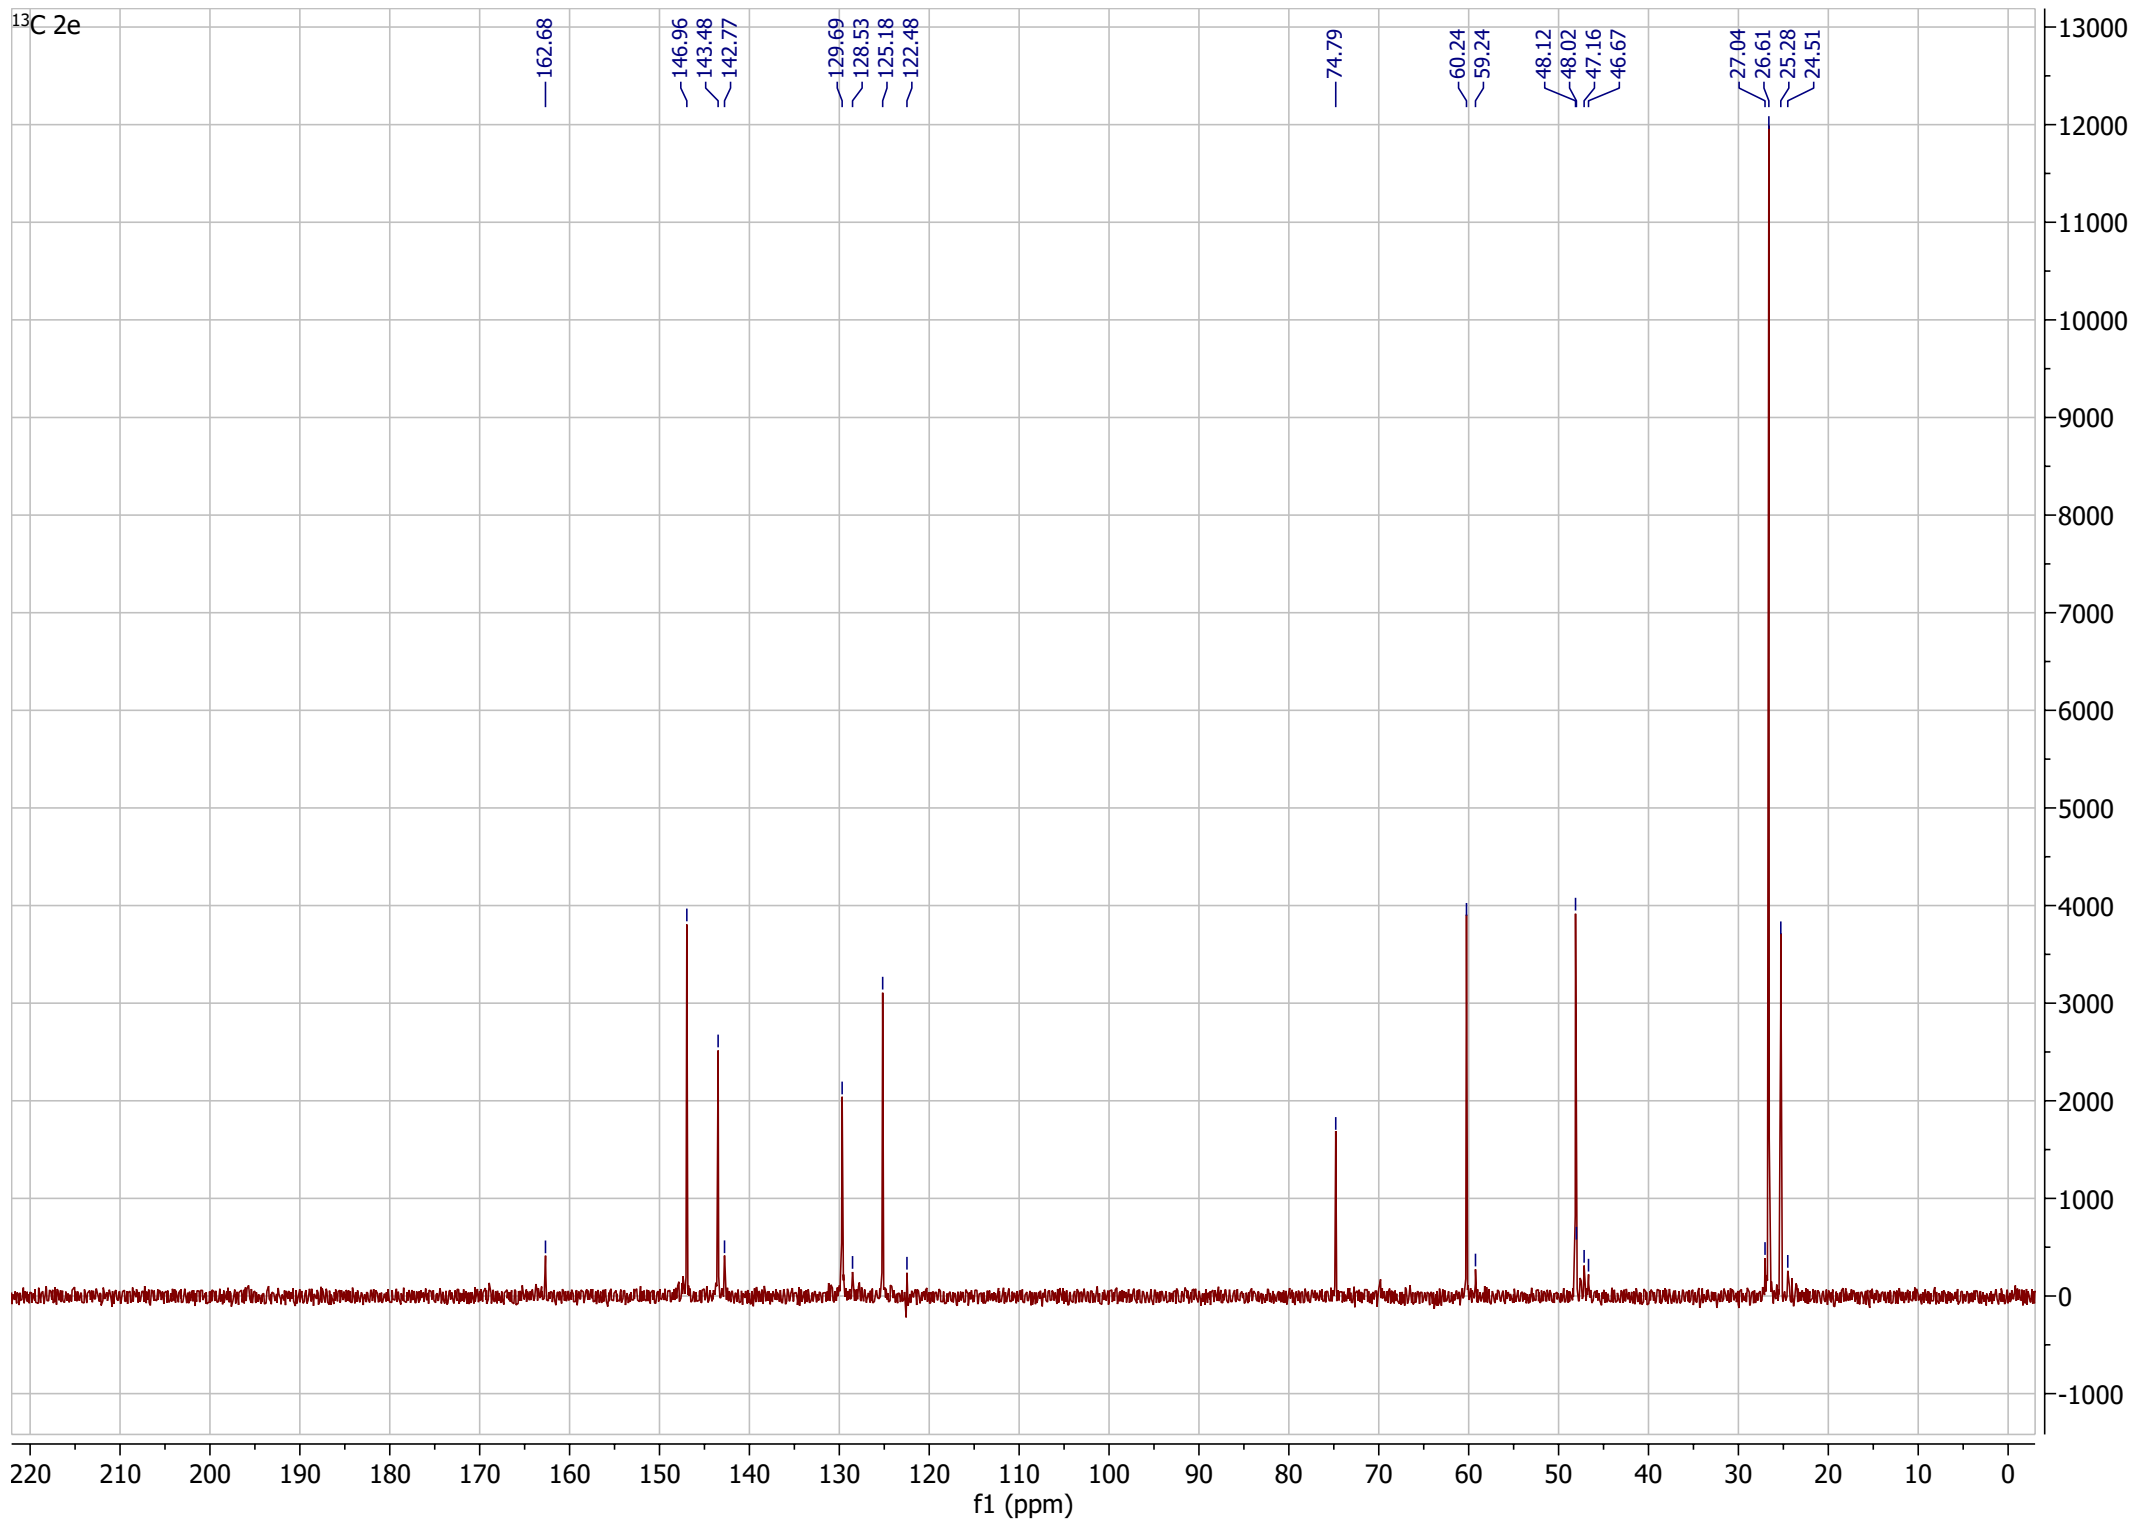

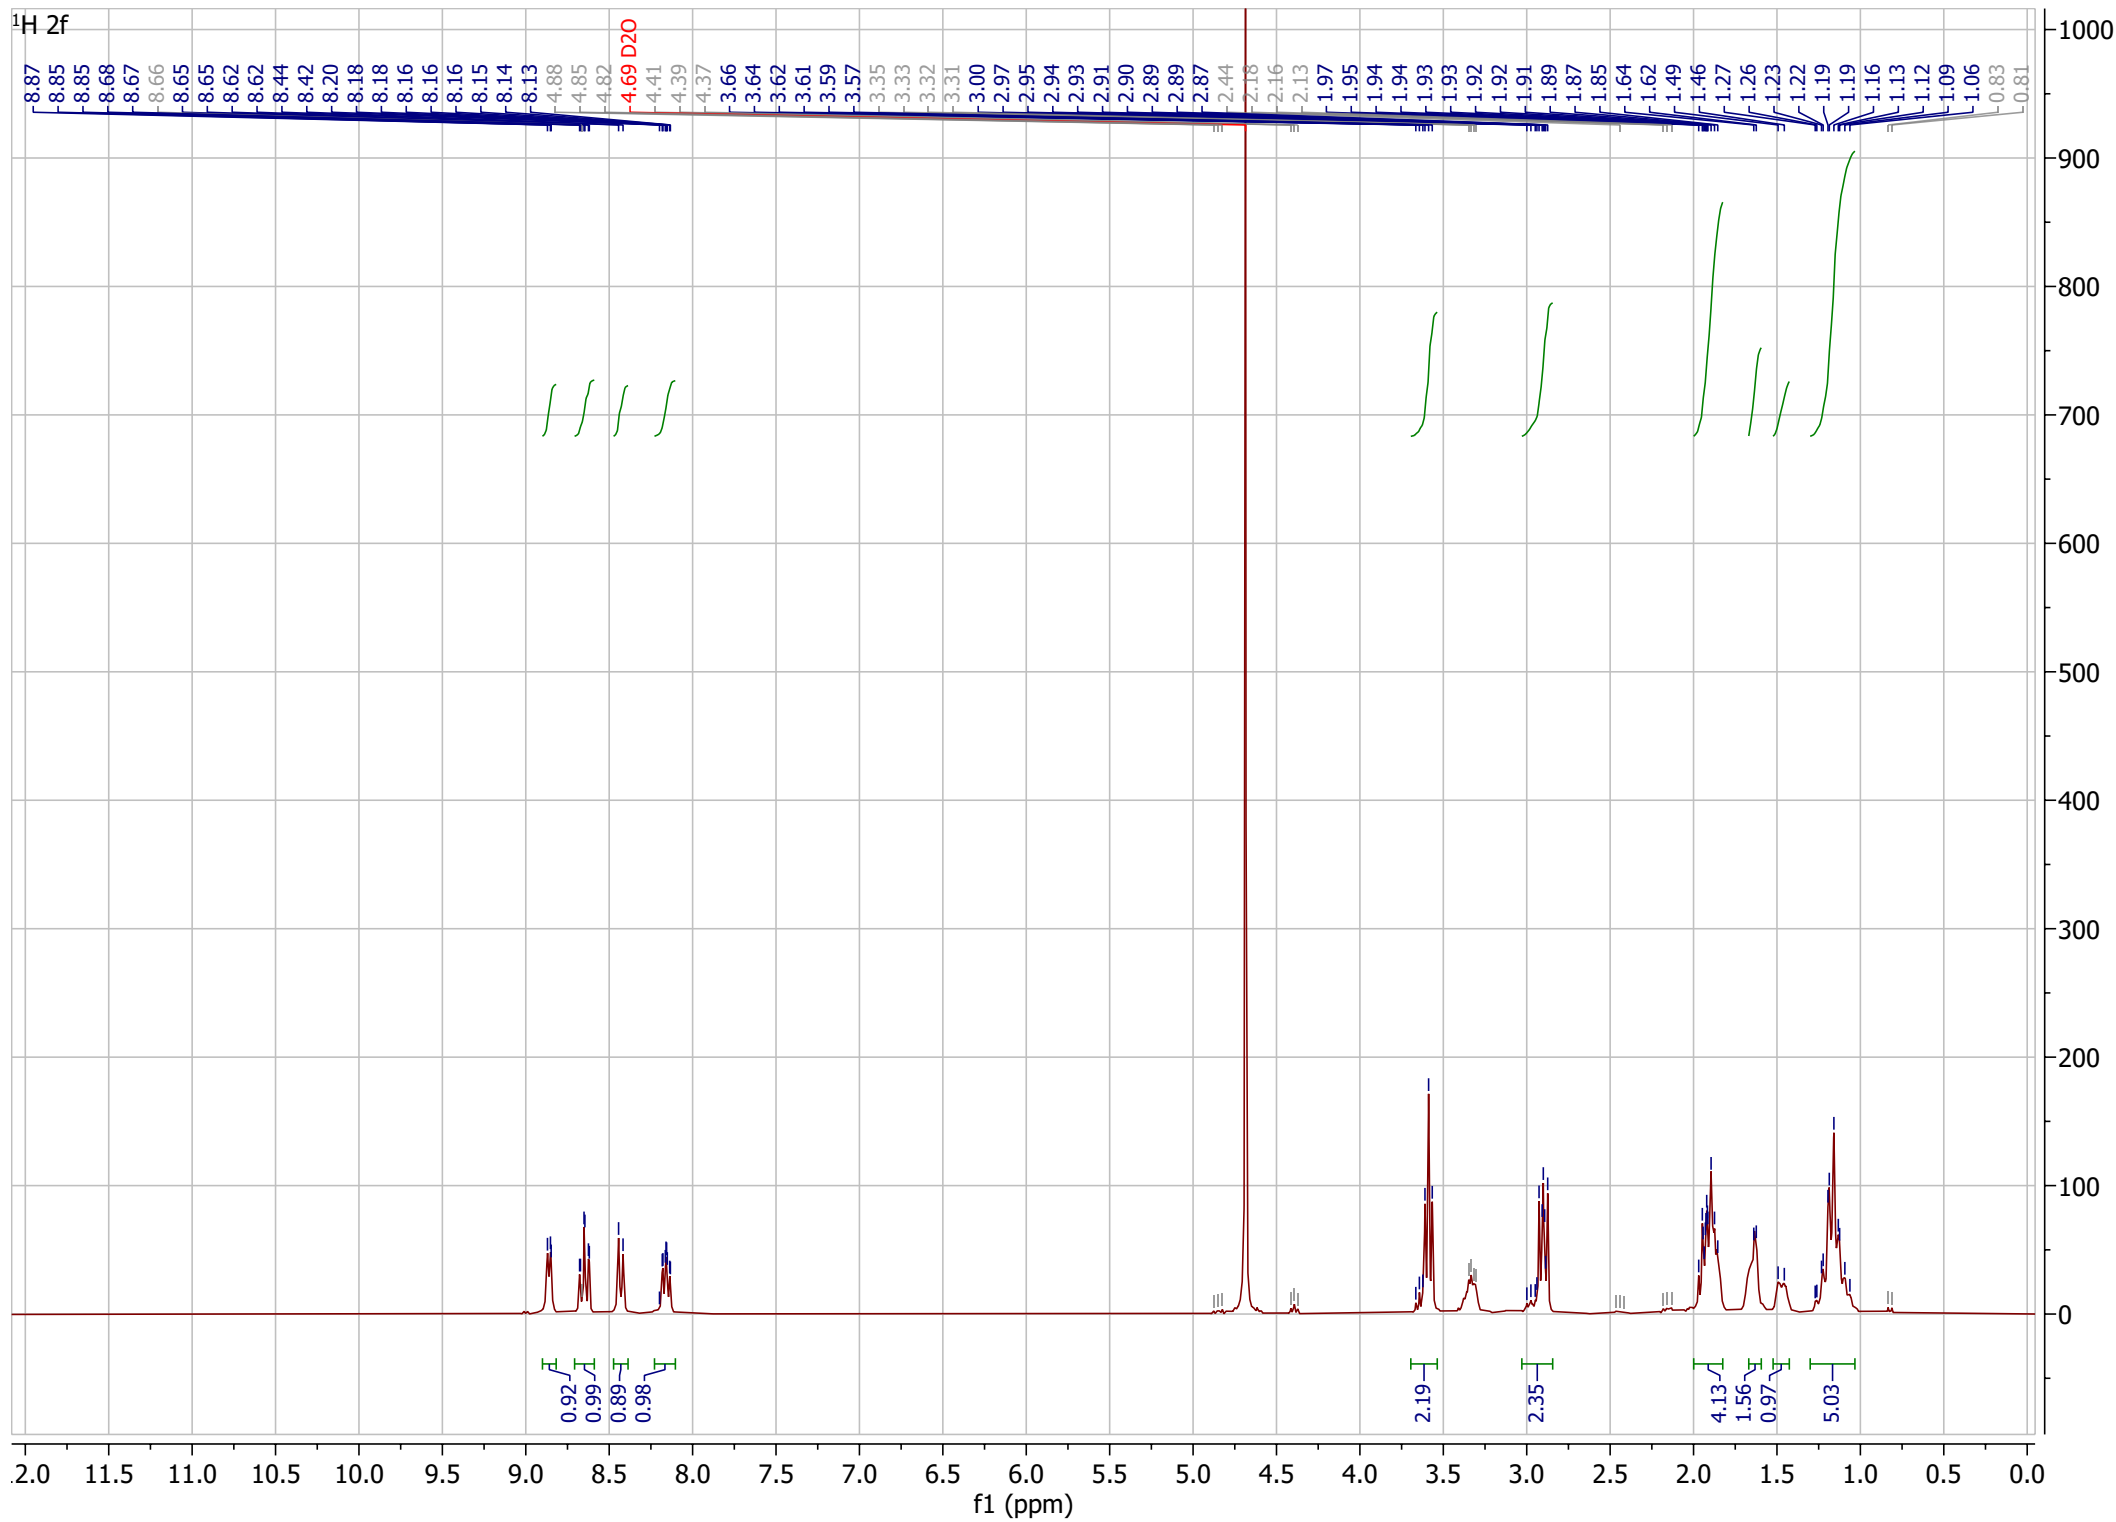

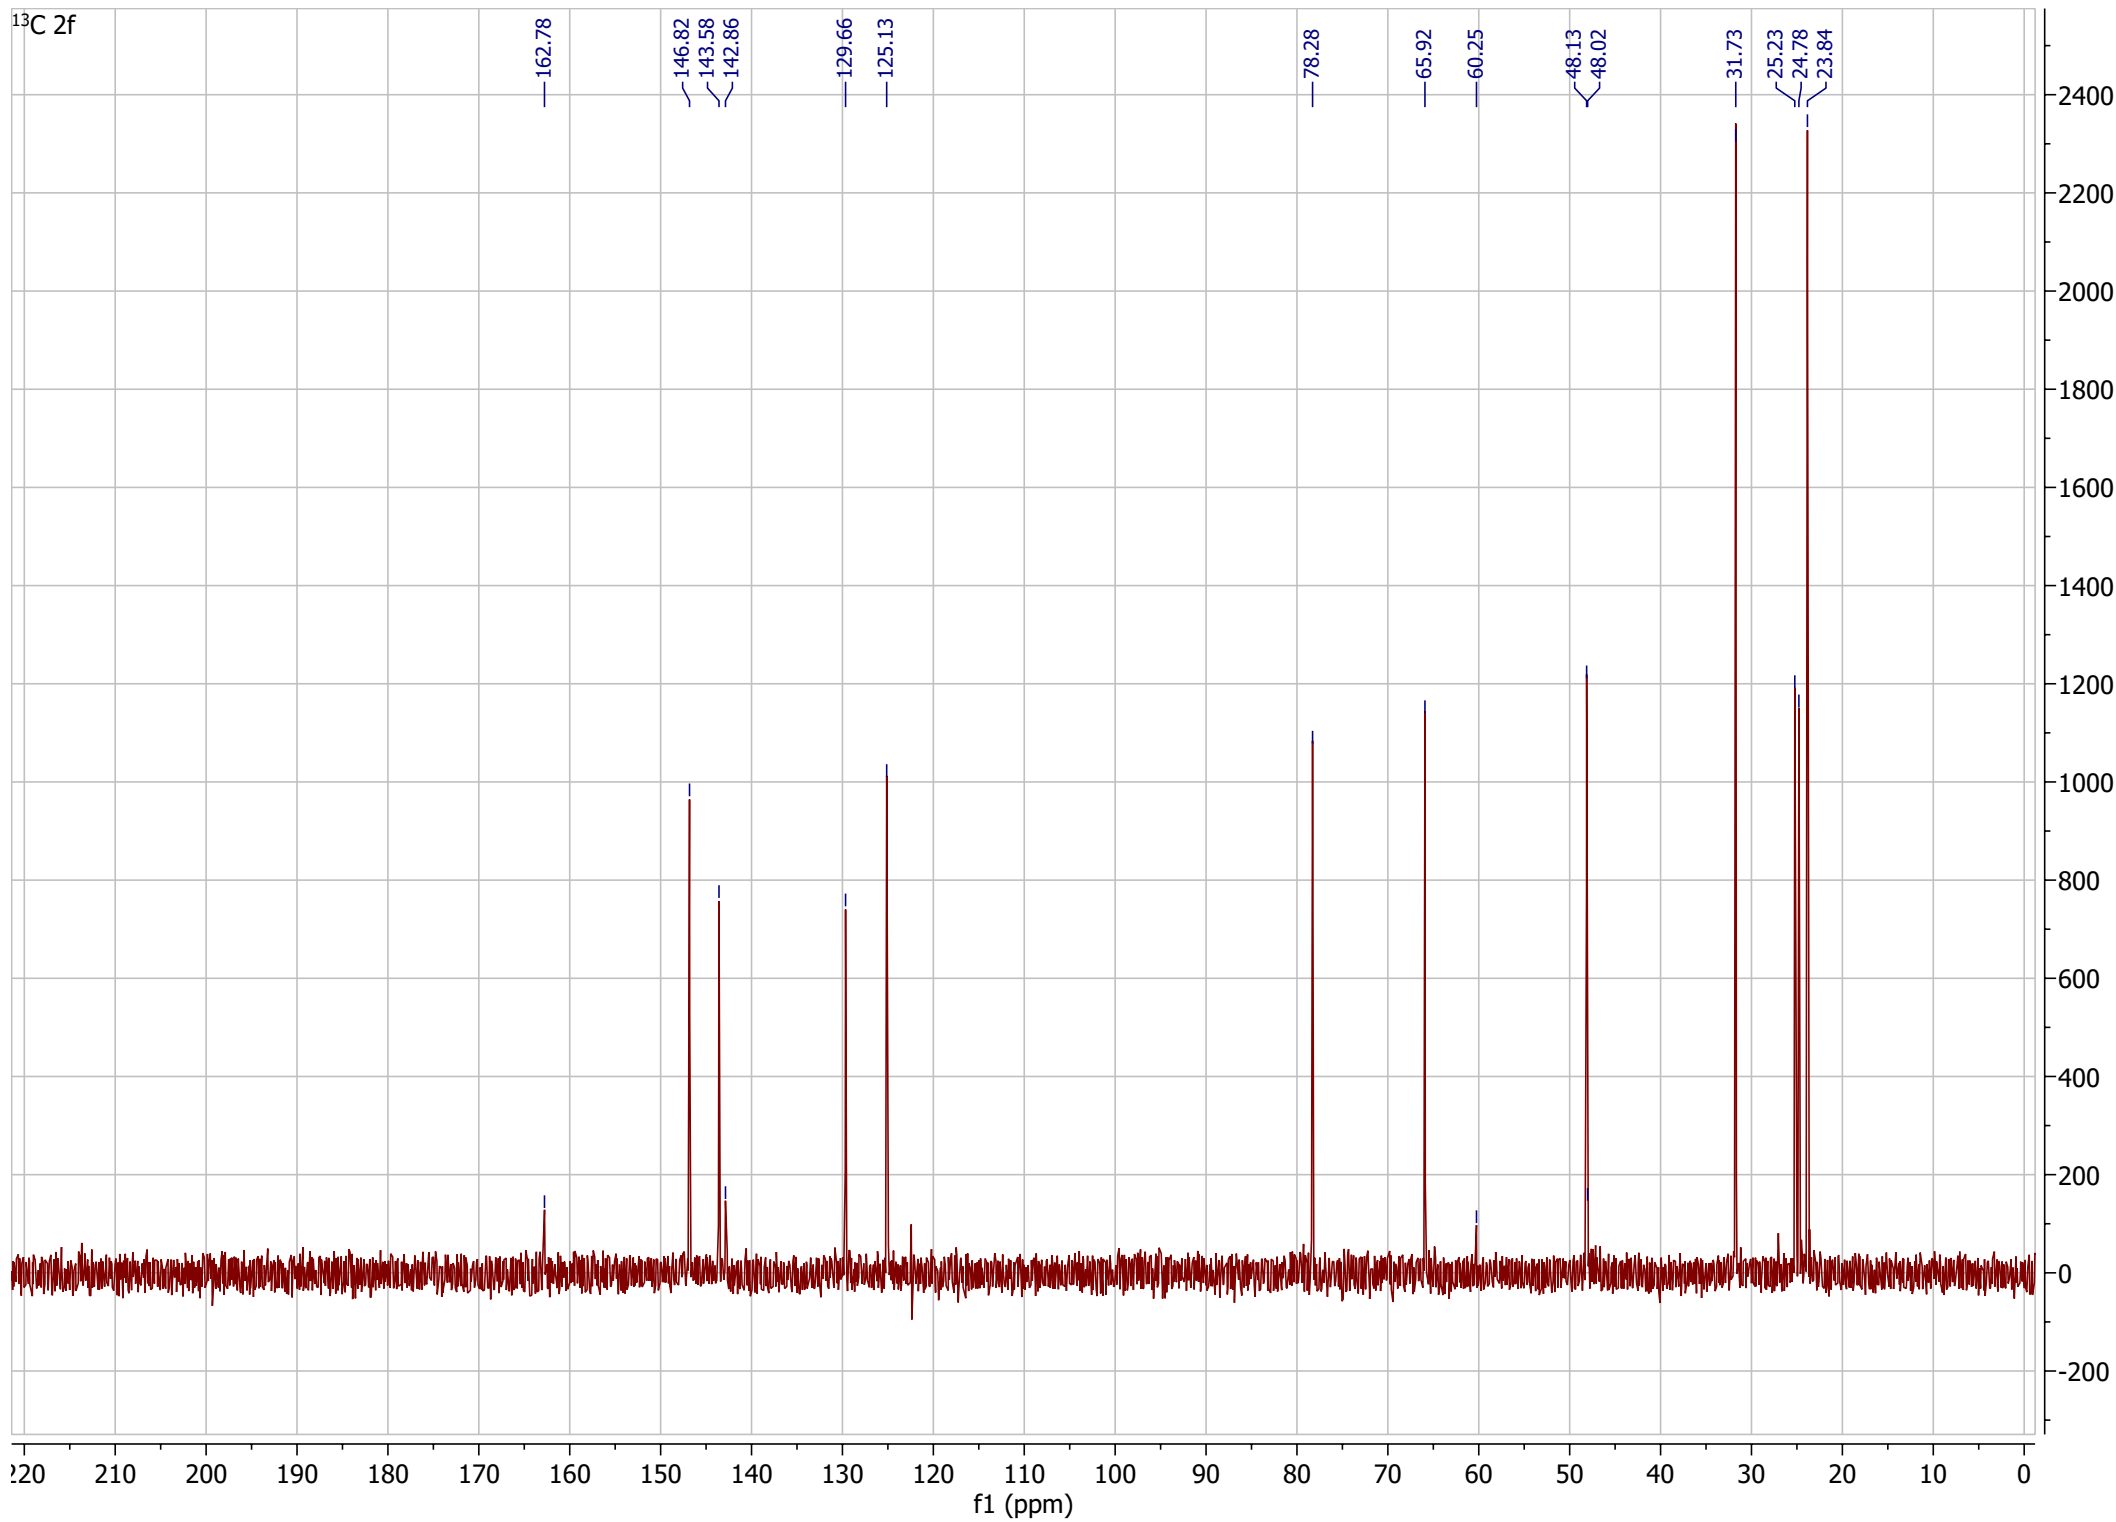

<sup>1</sup>H 2g

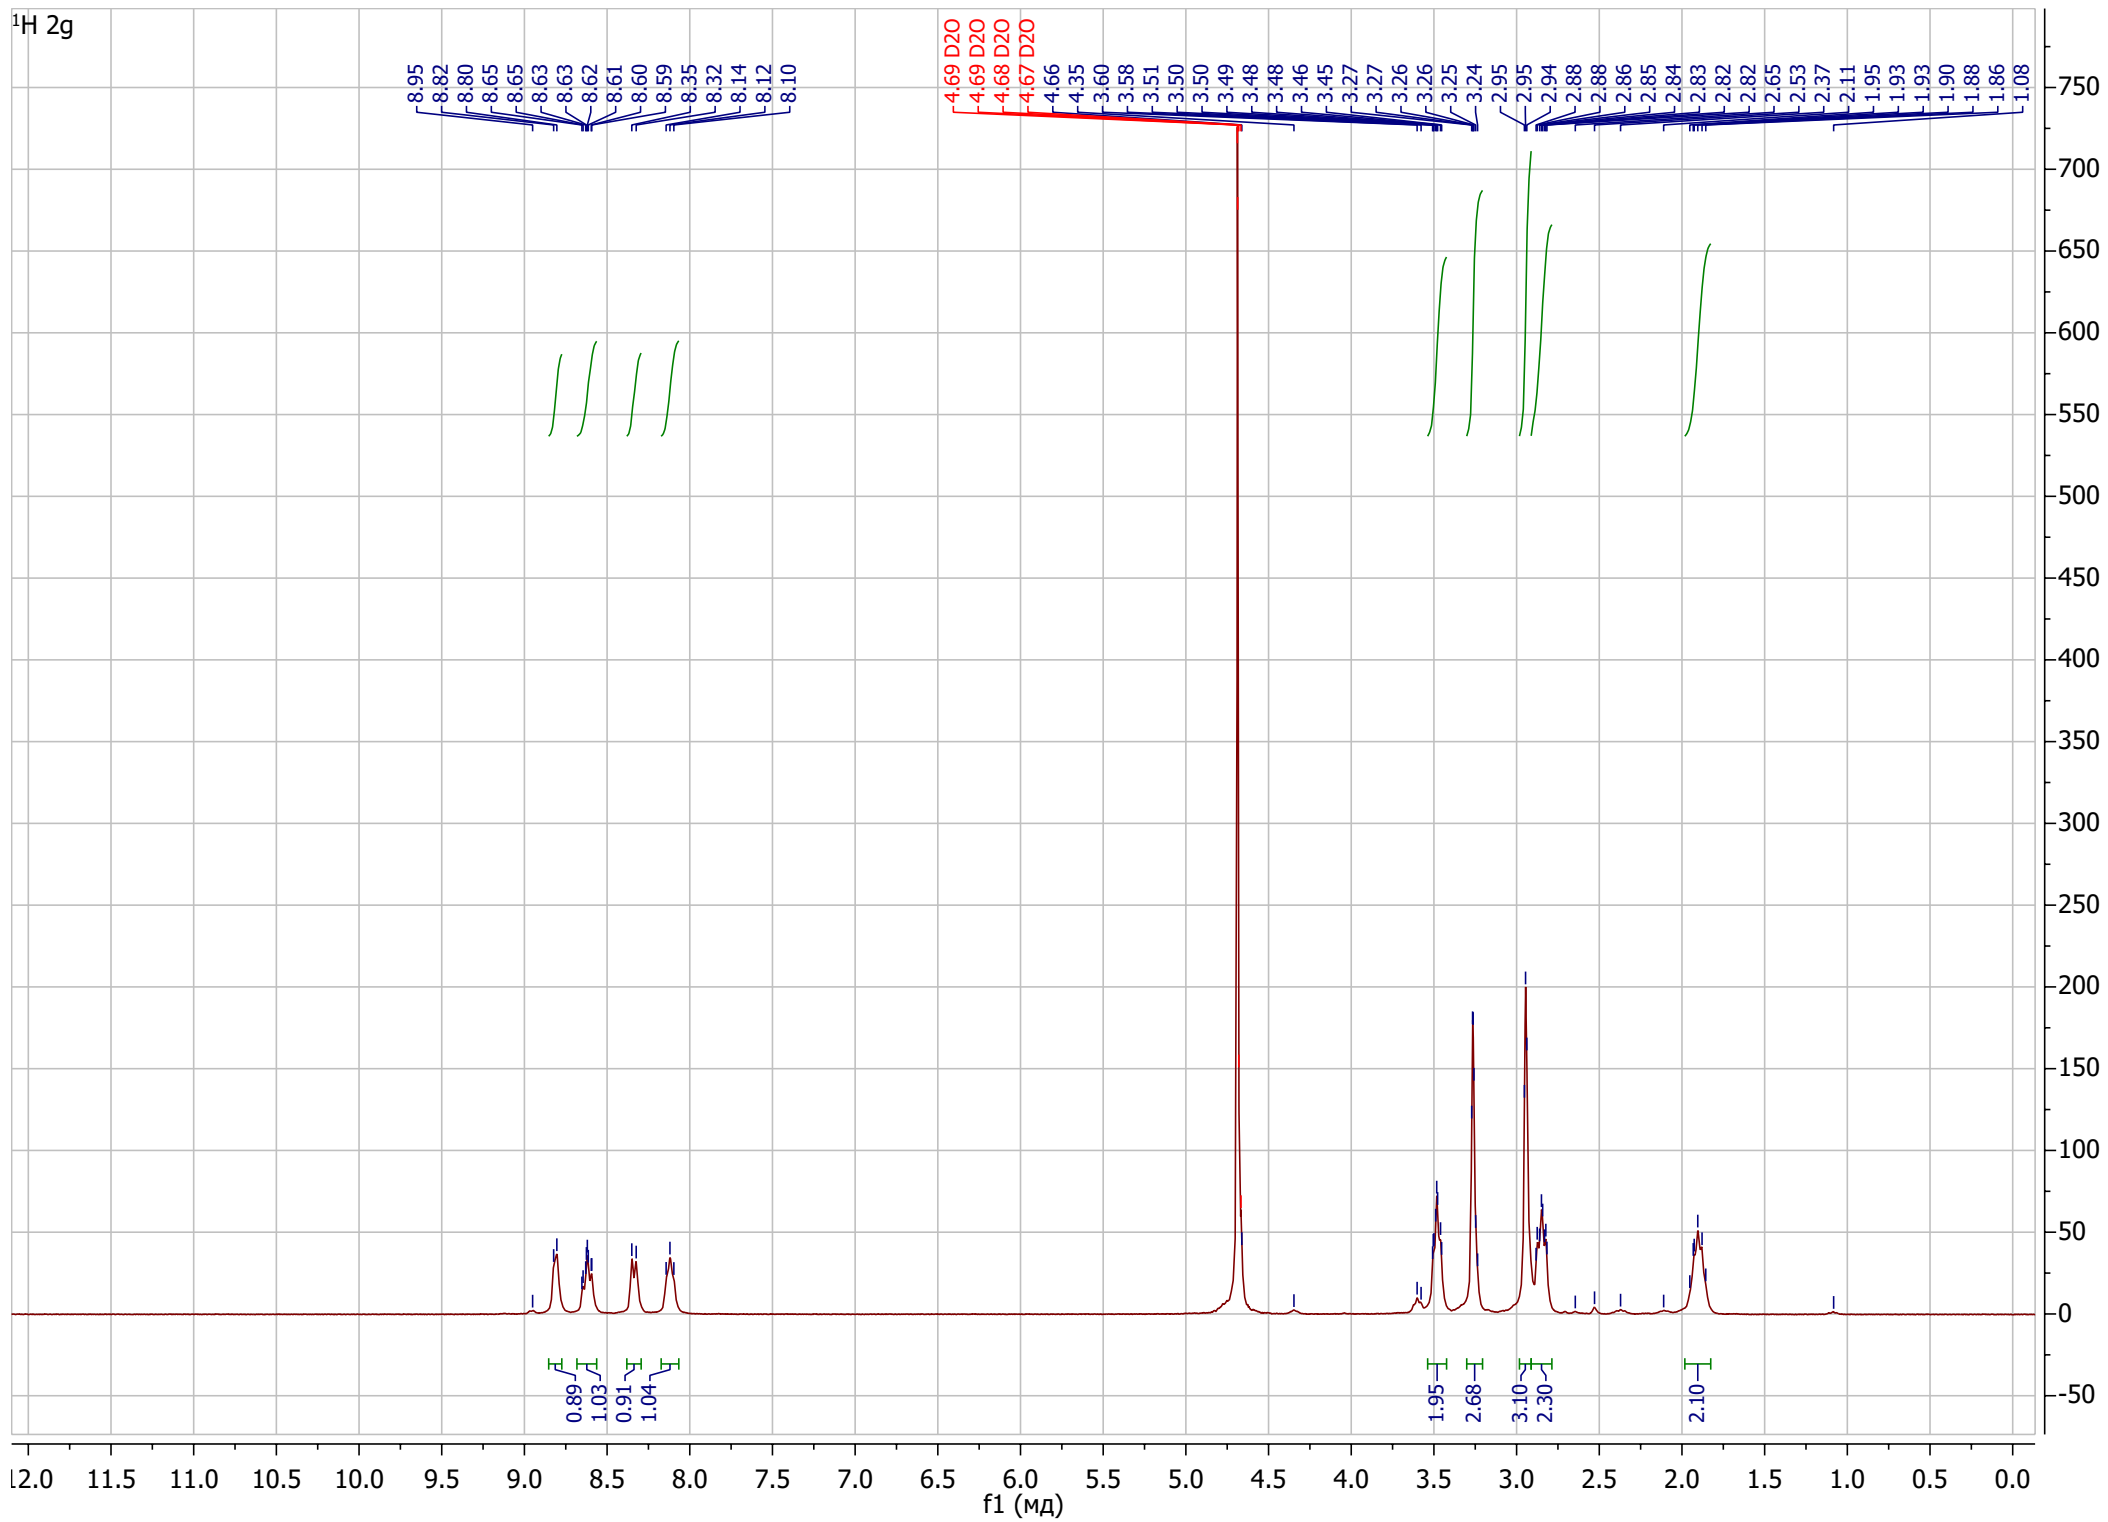

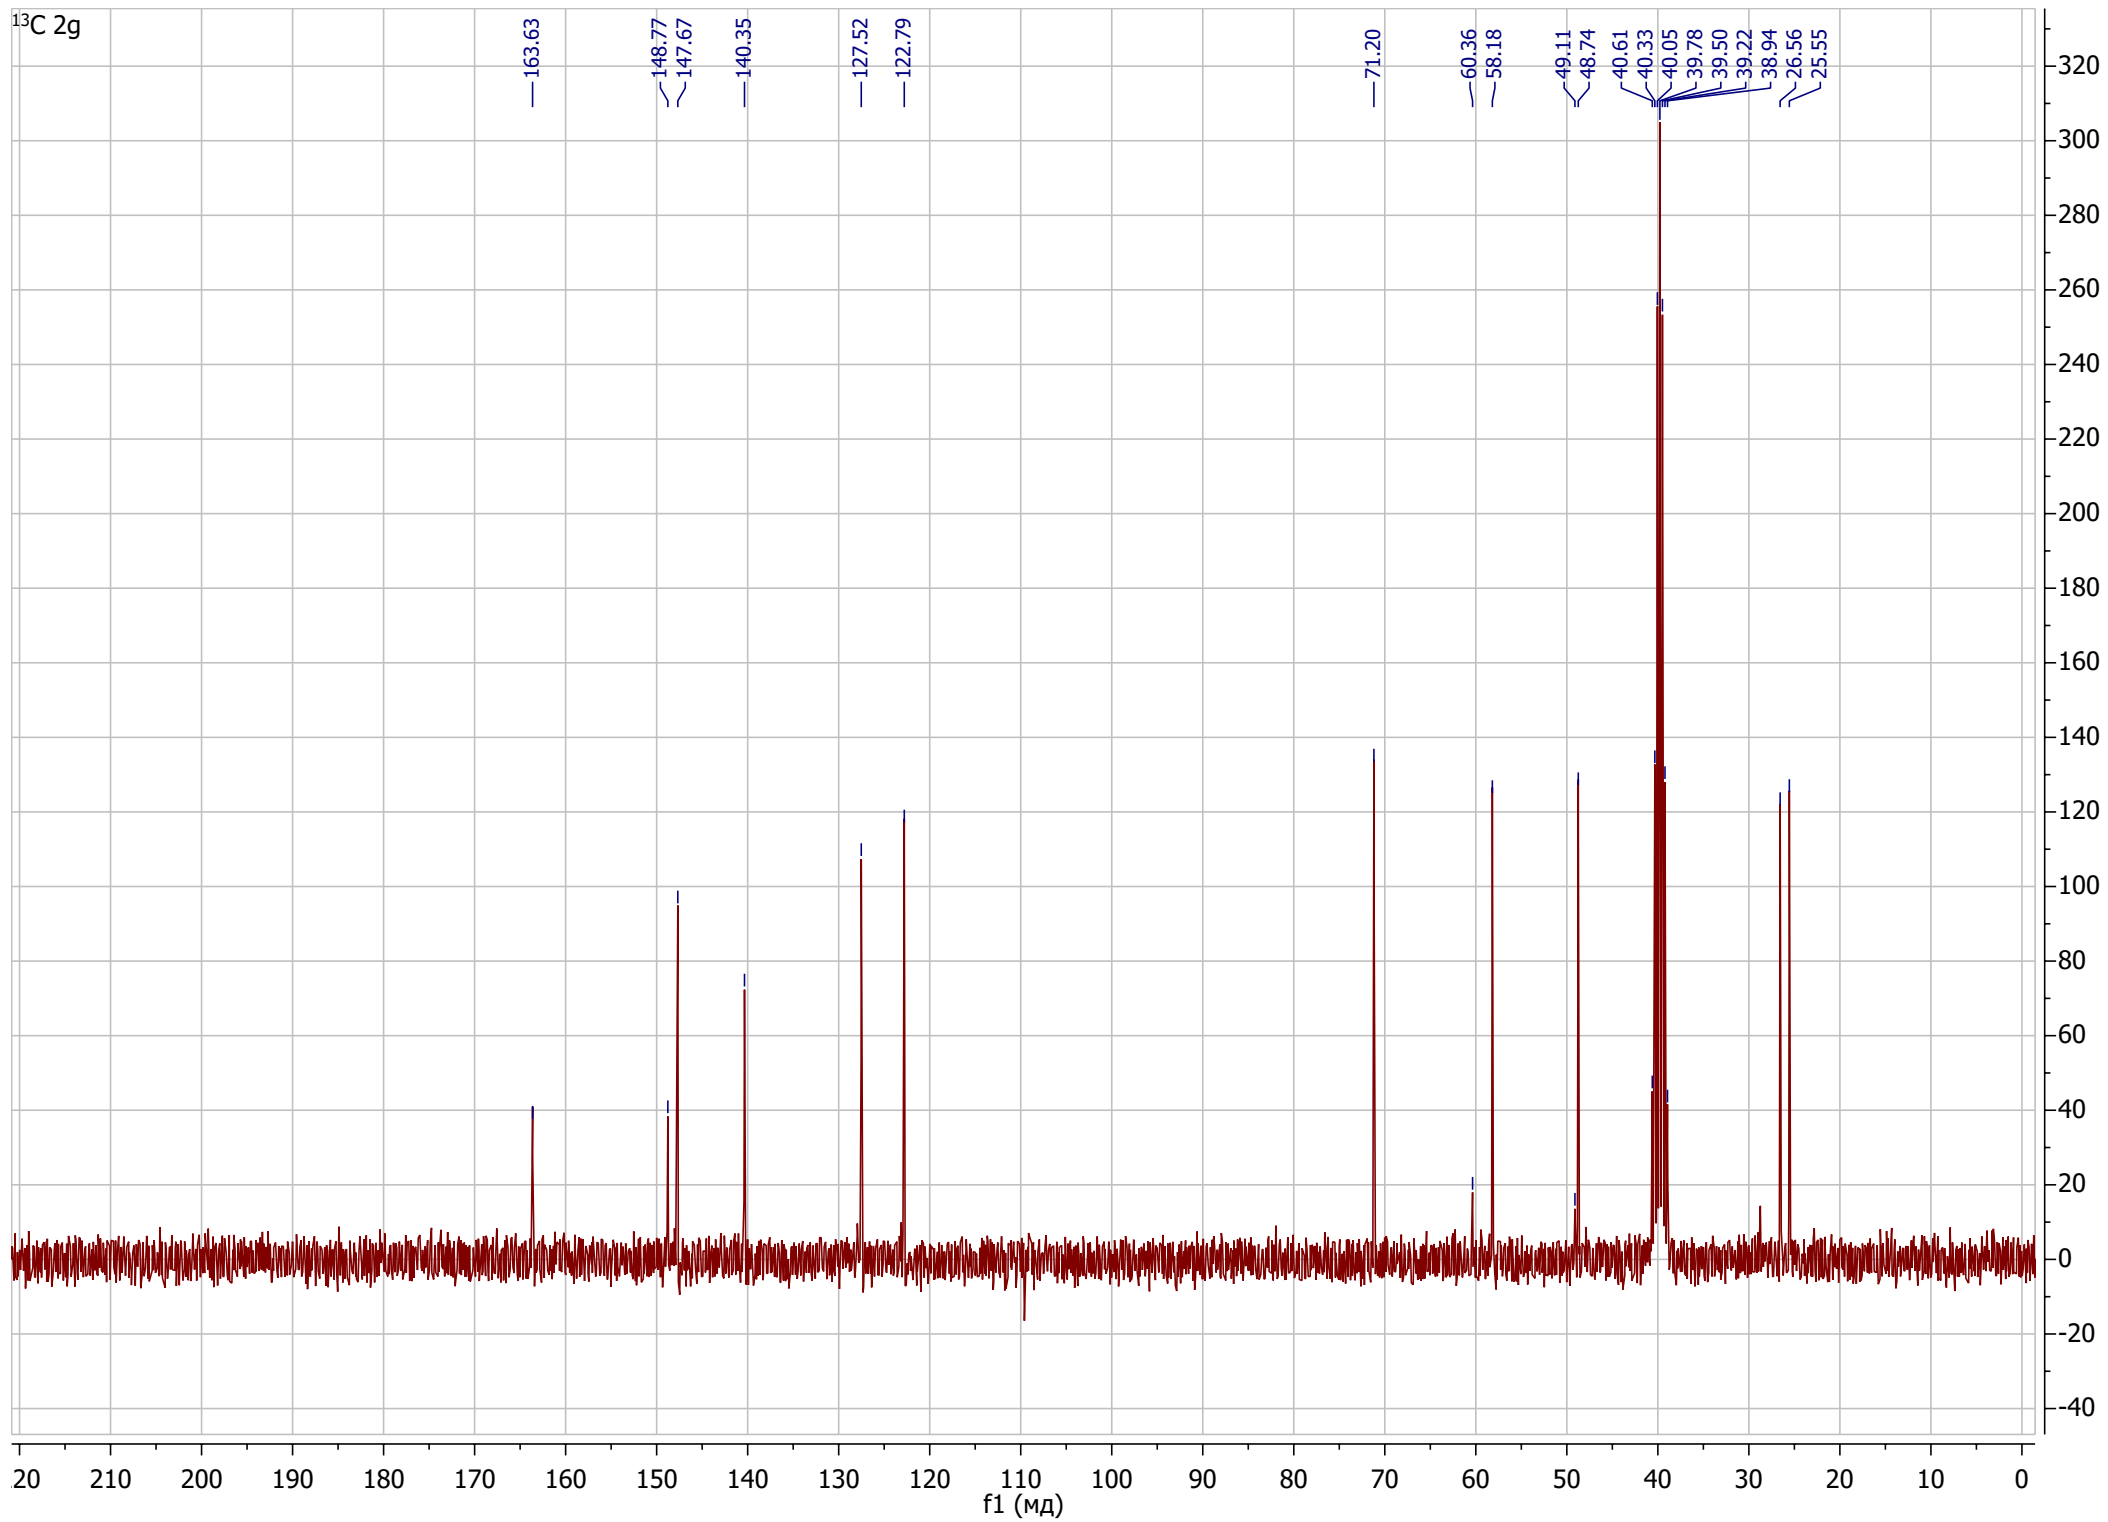

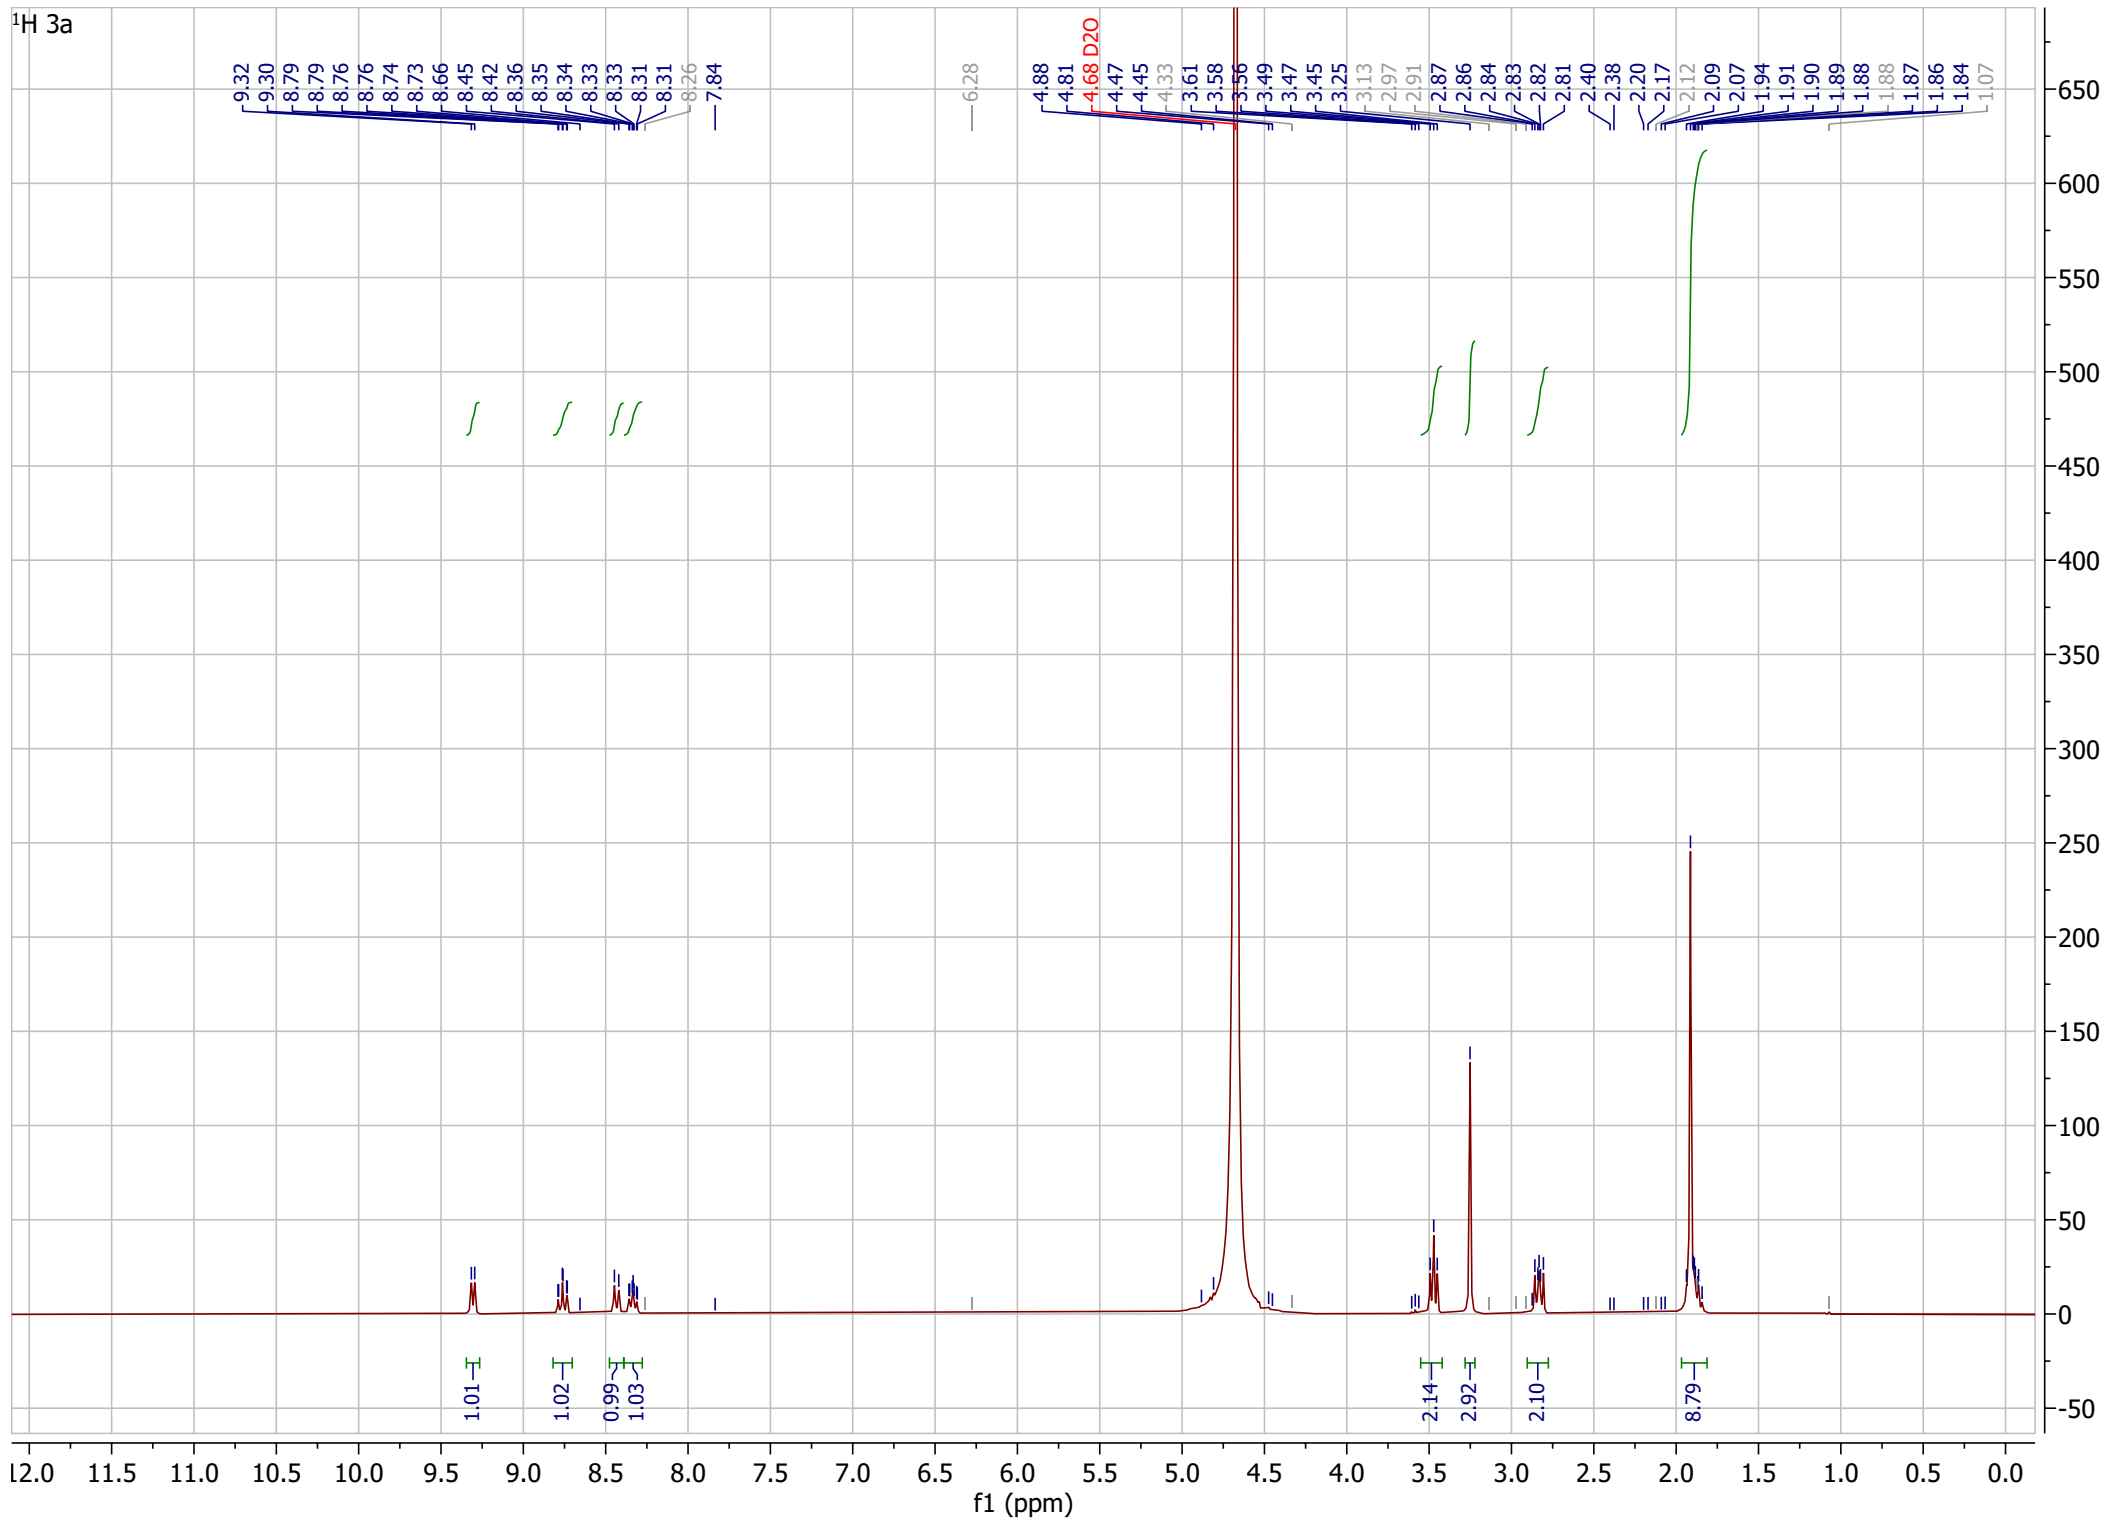

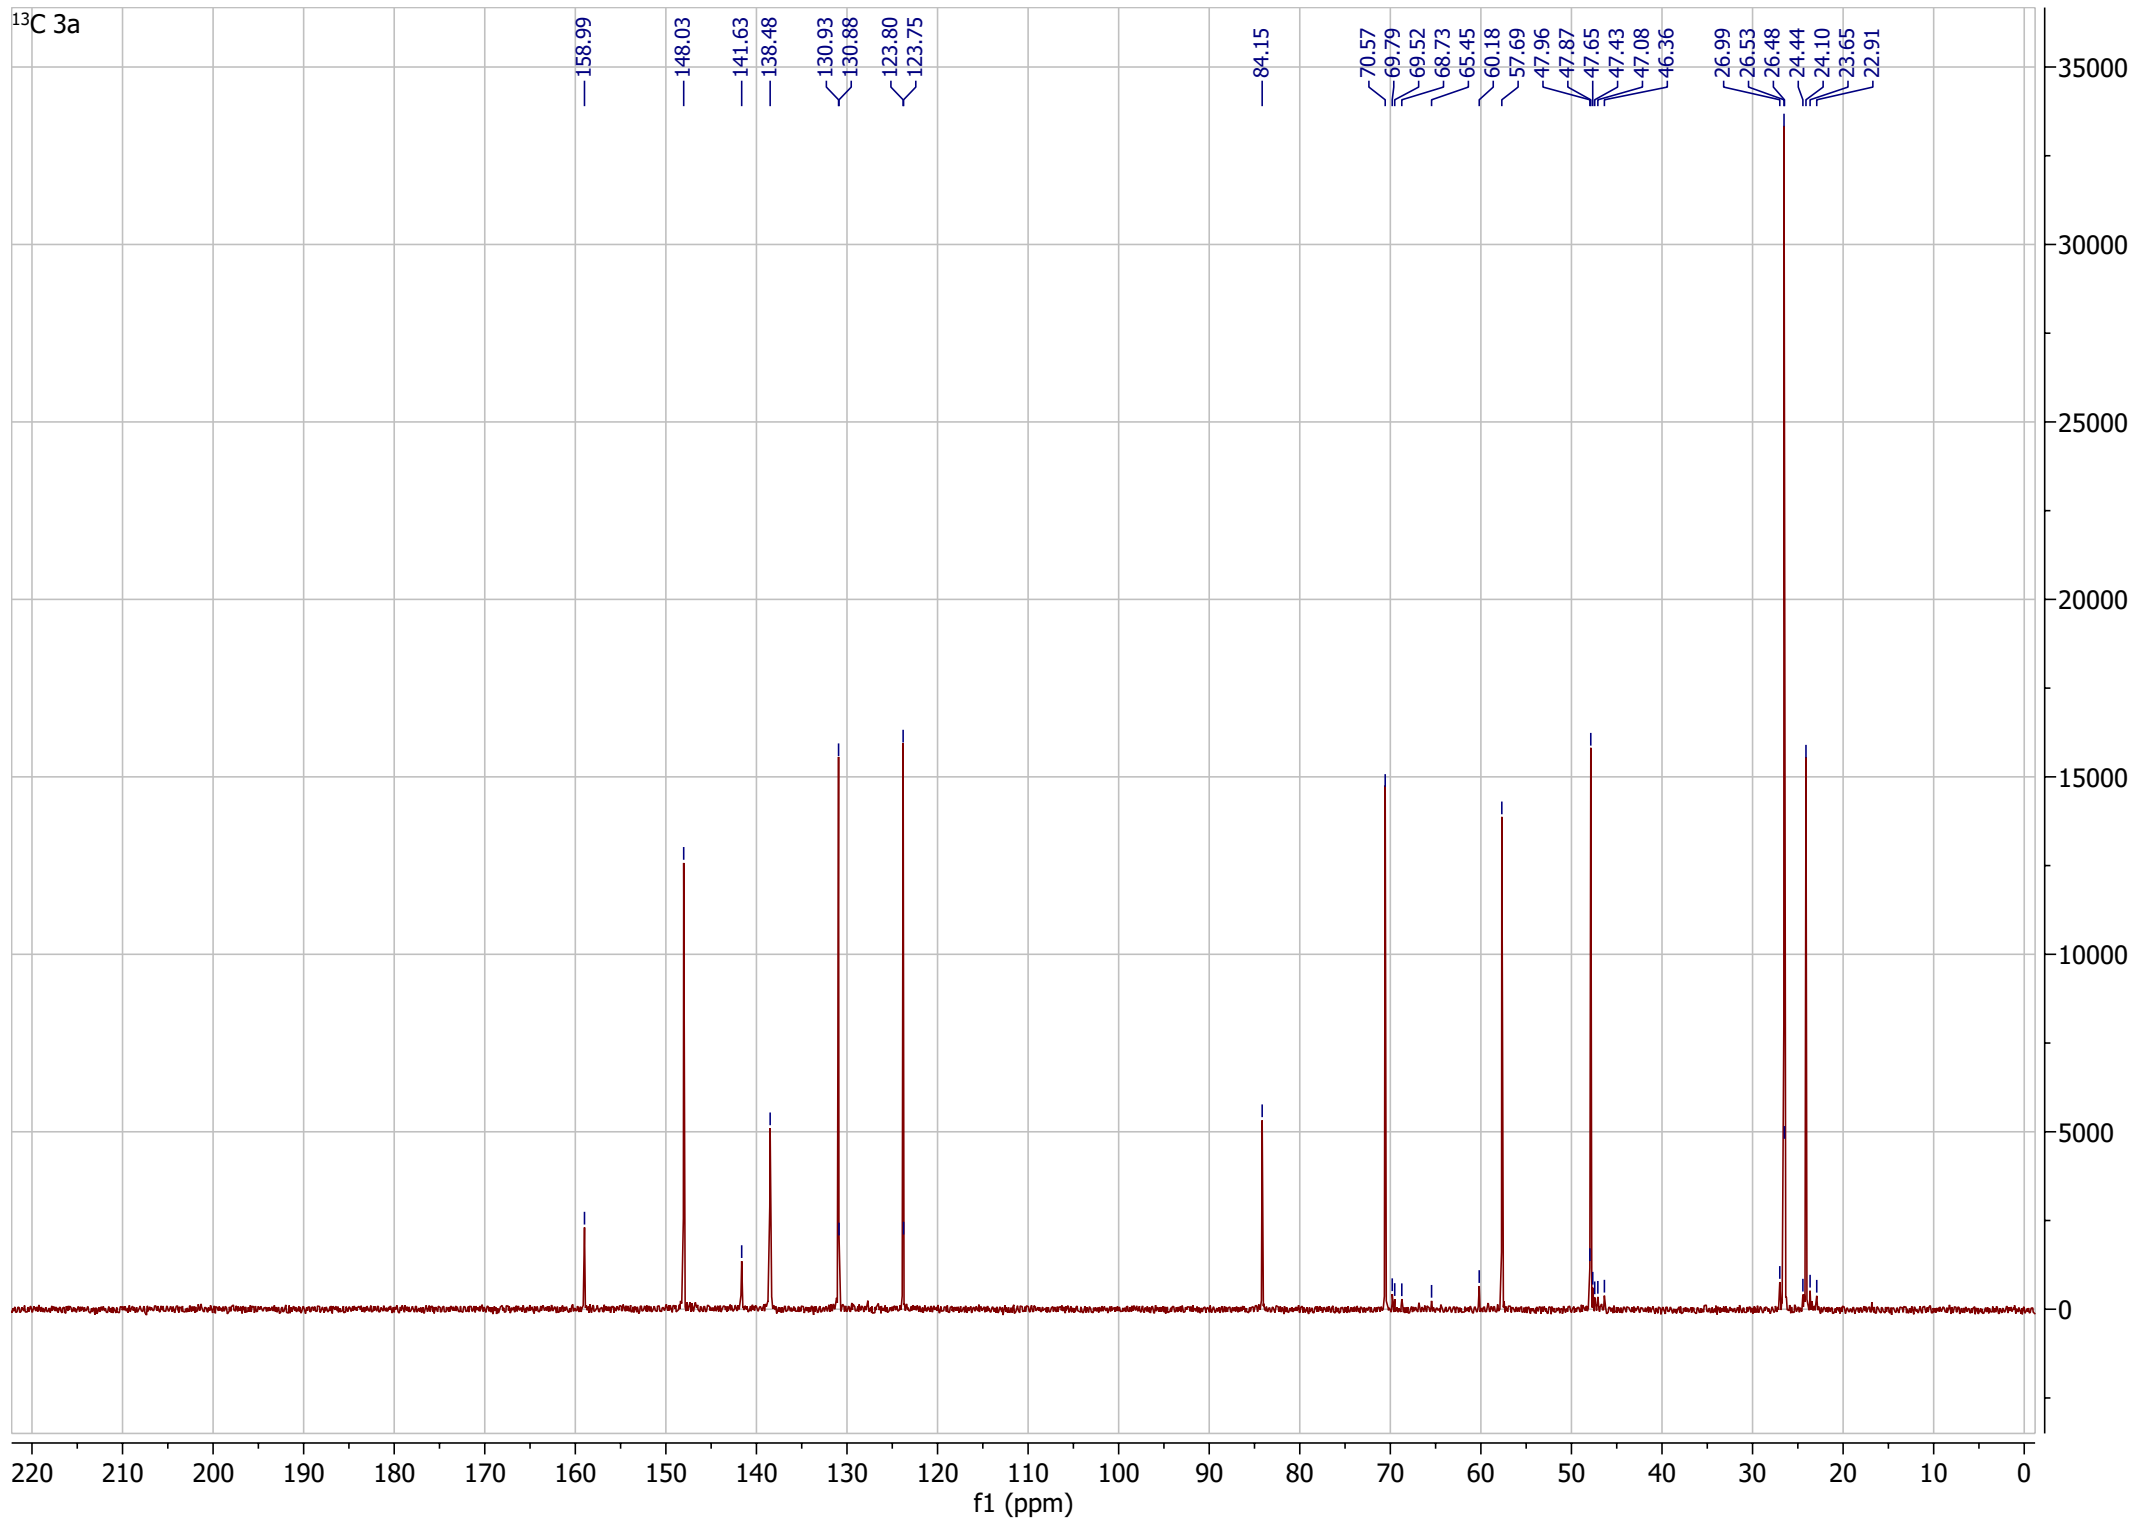



<sup>1</sup>H 3b

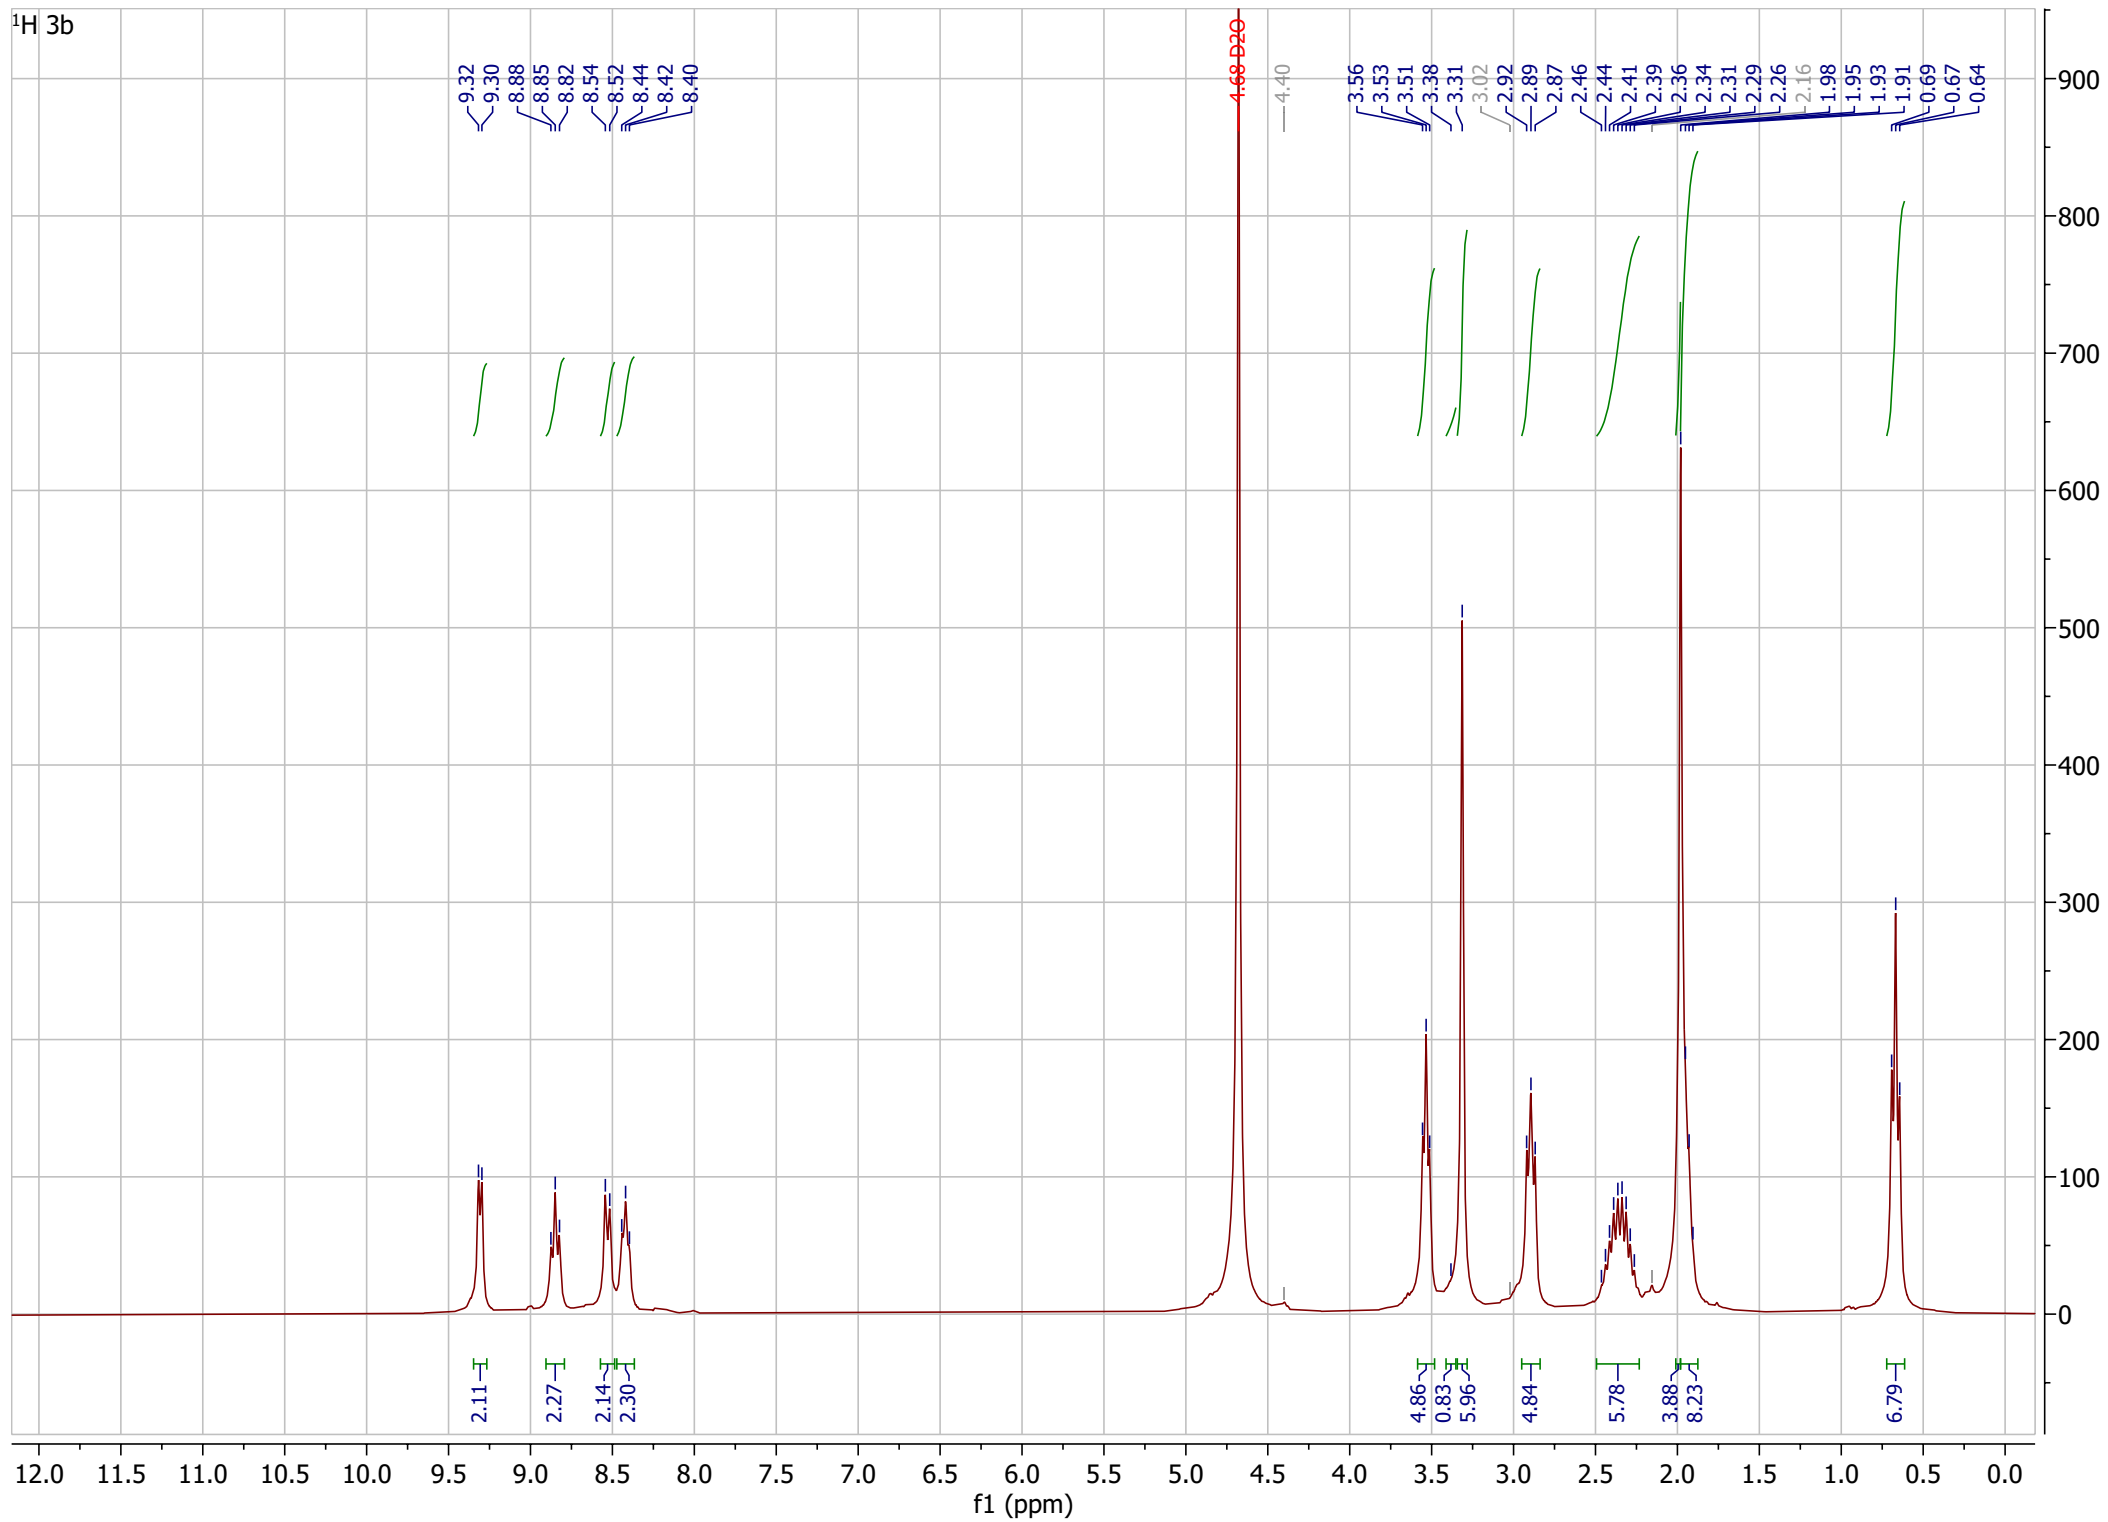

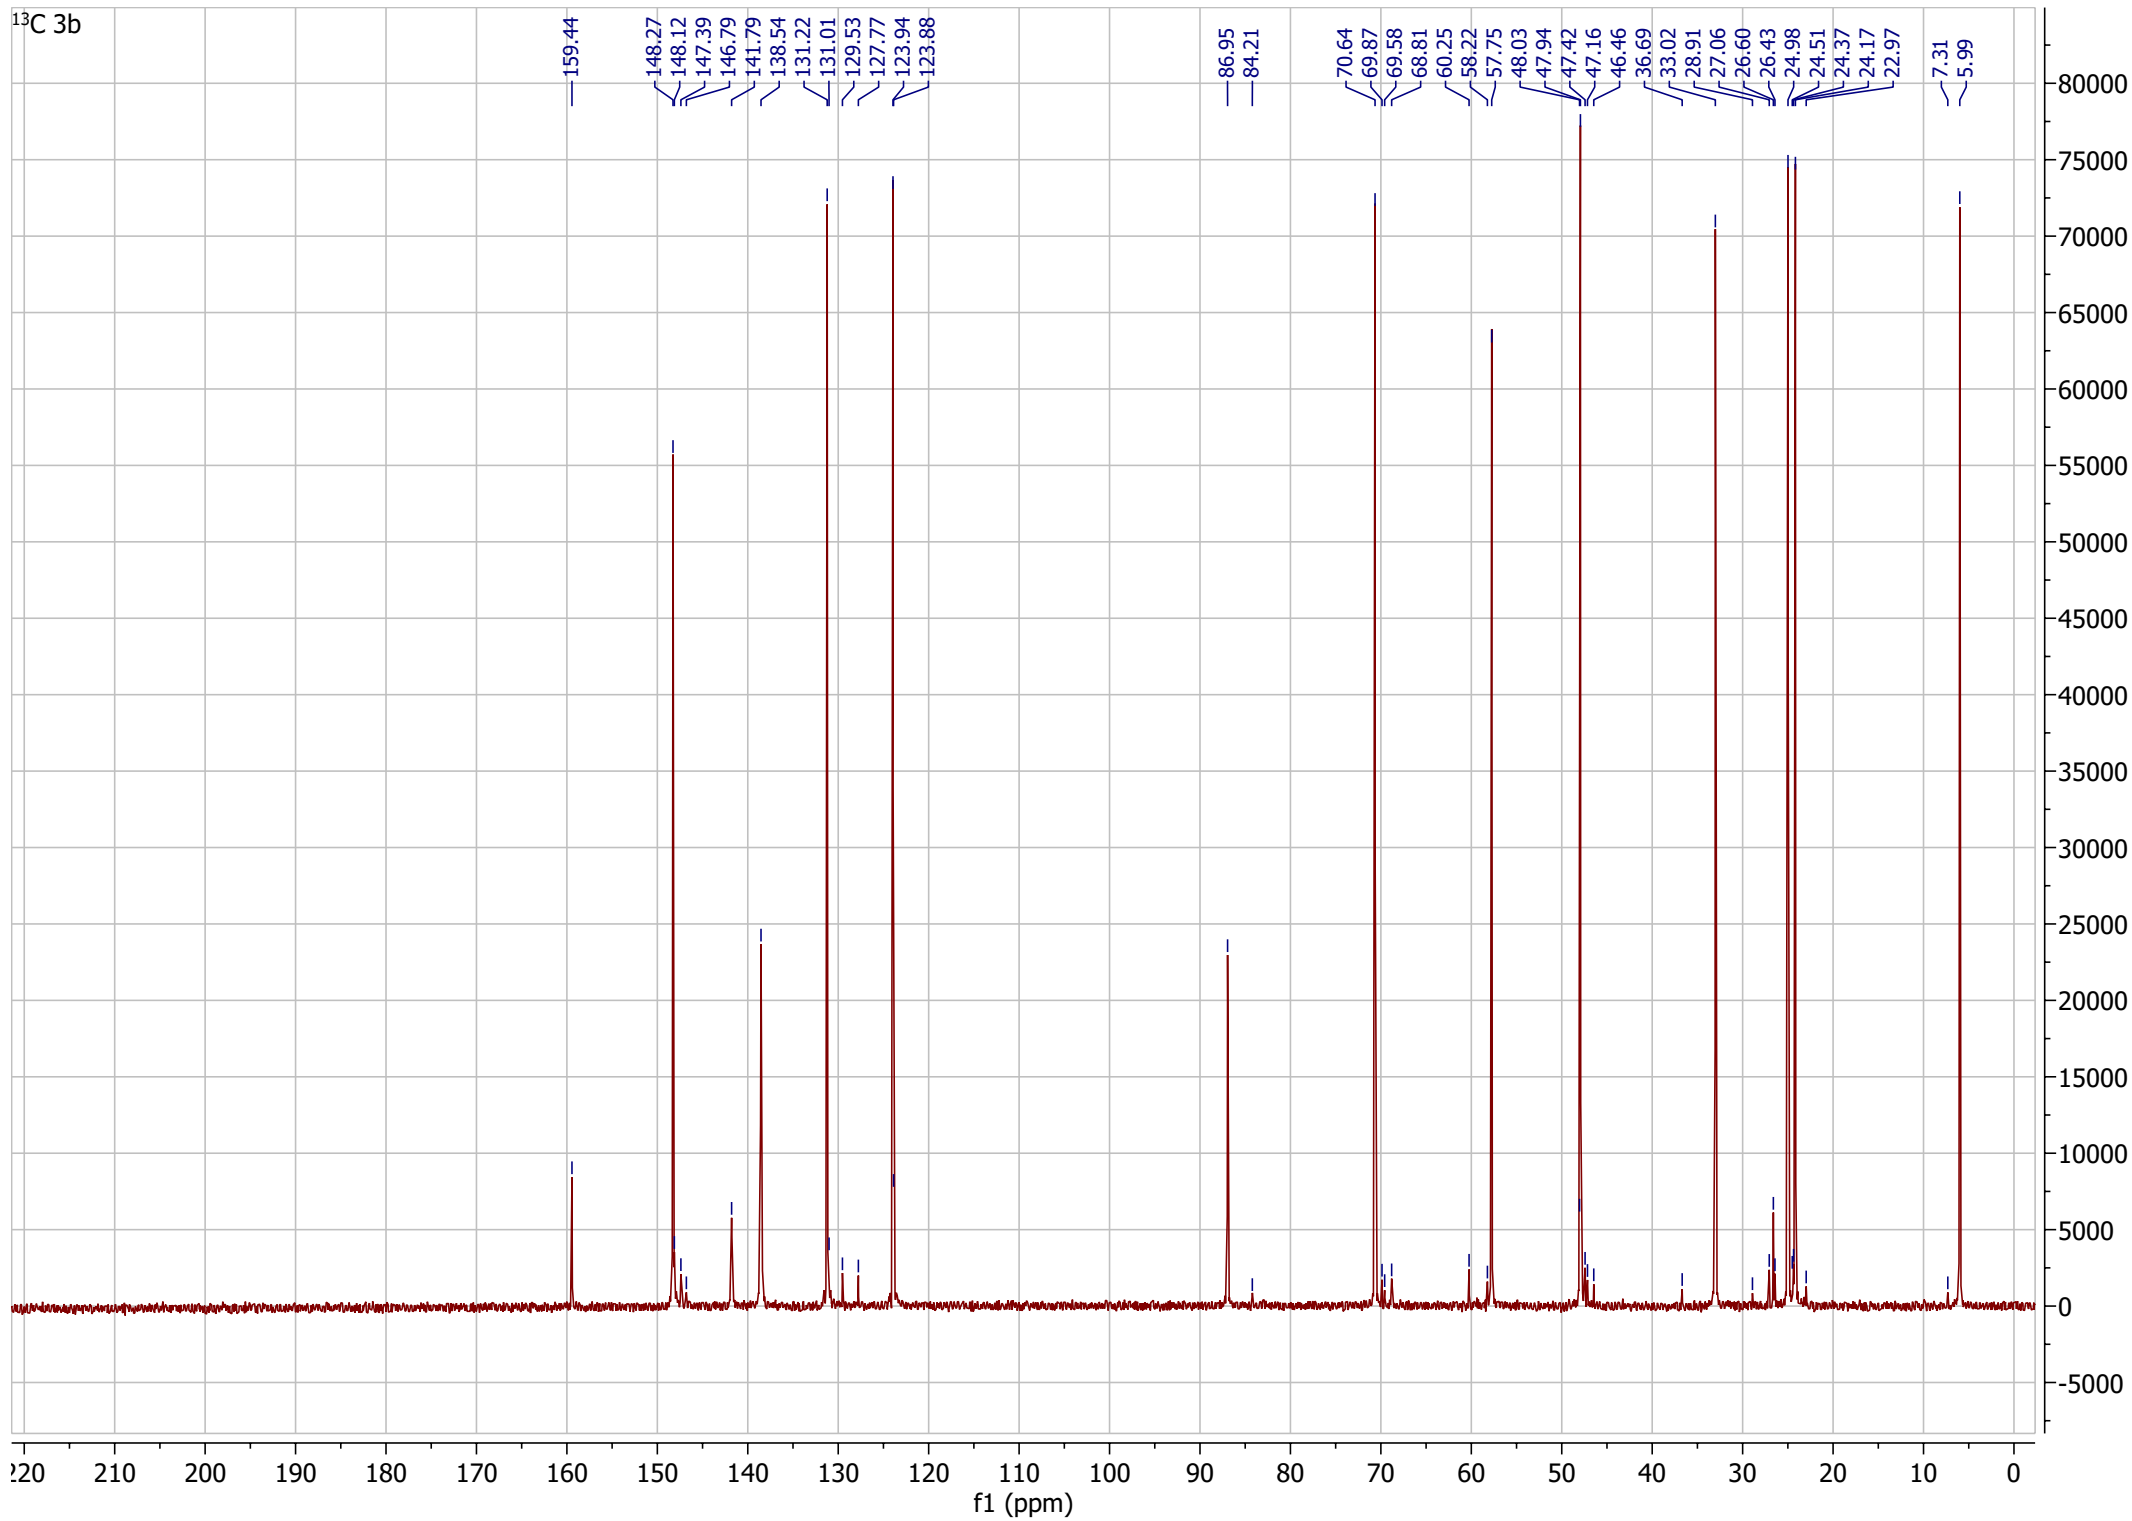

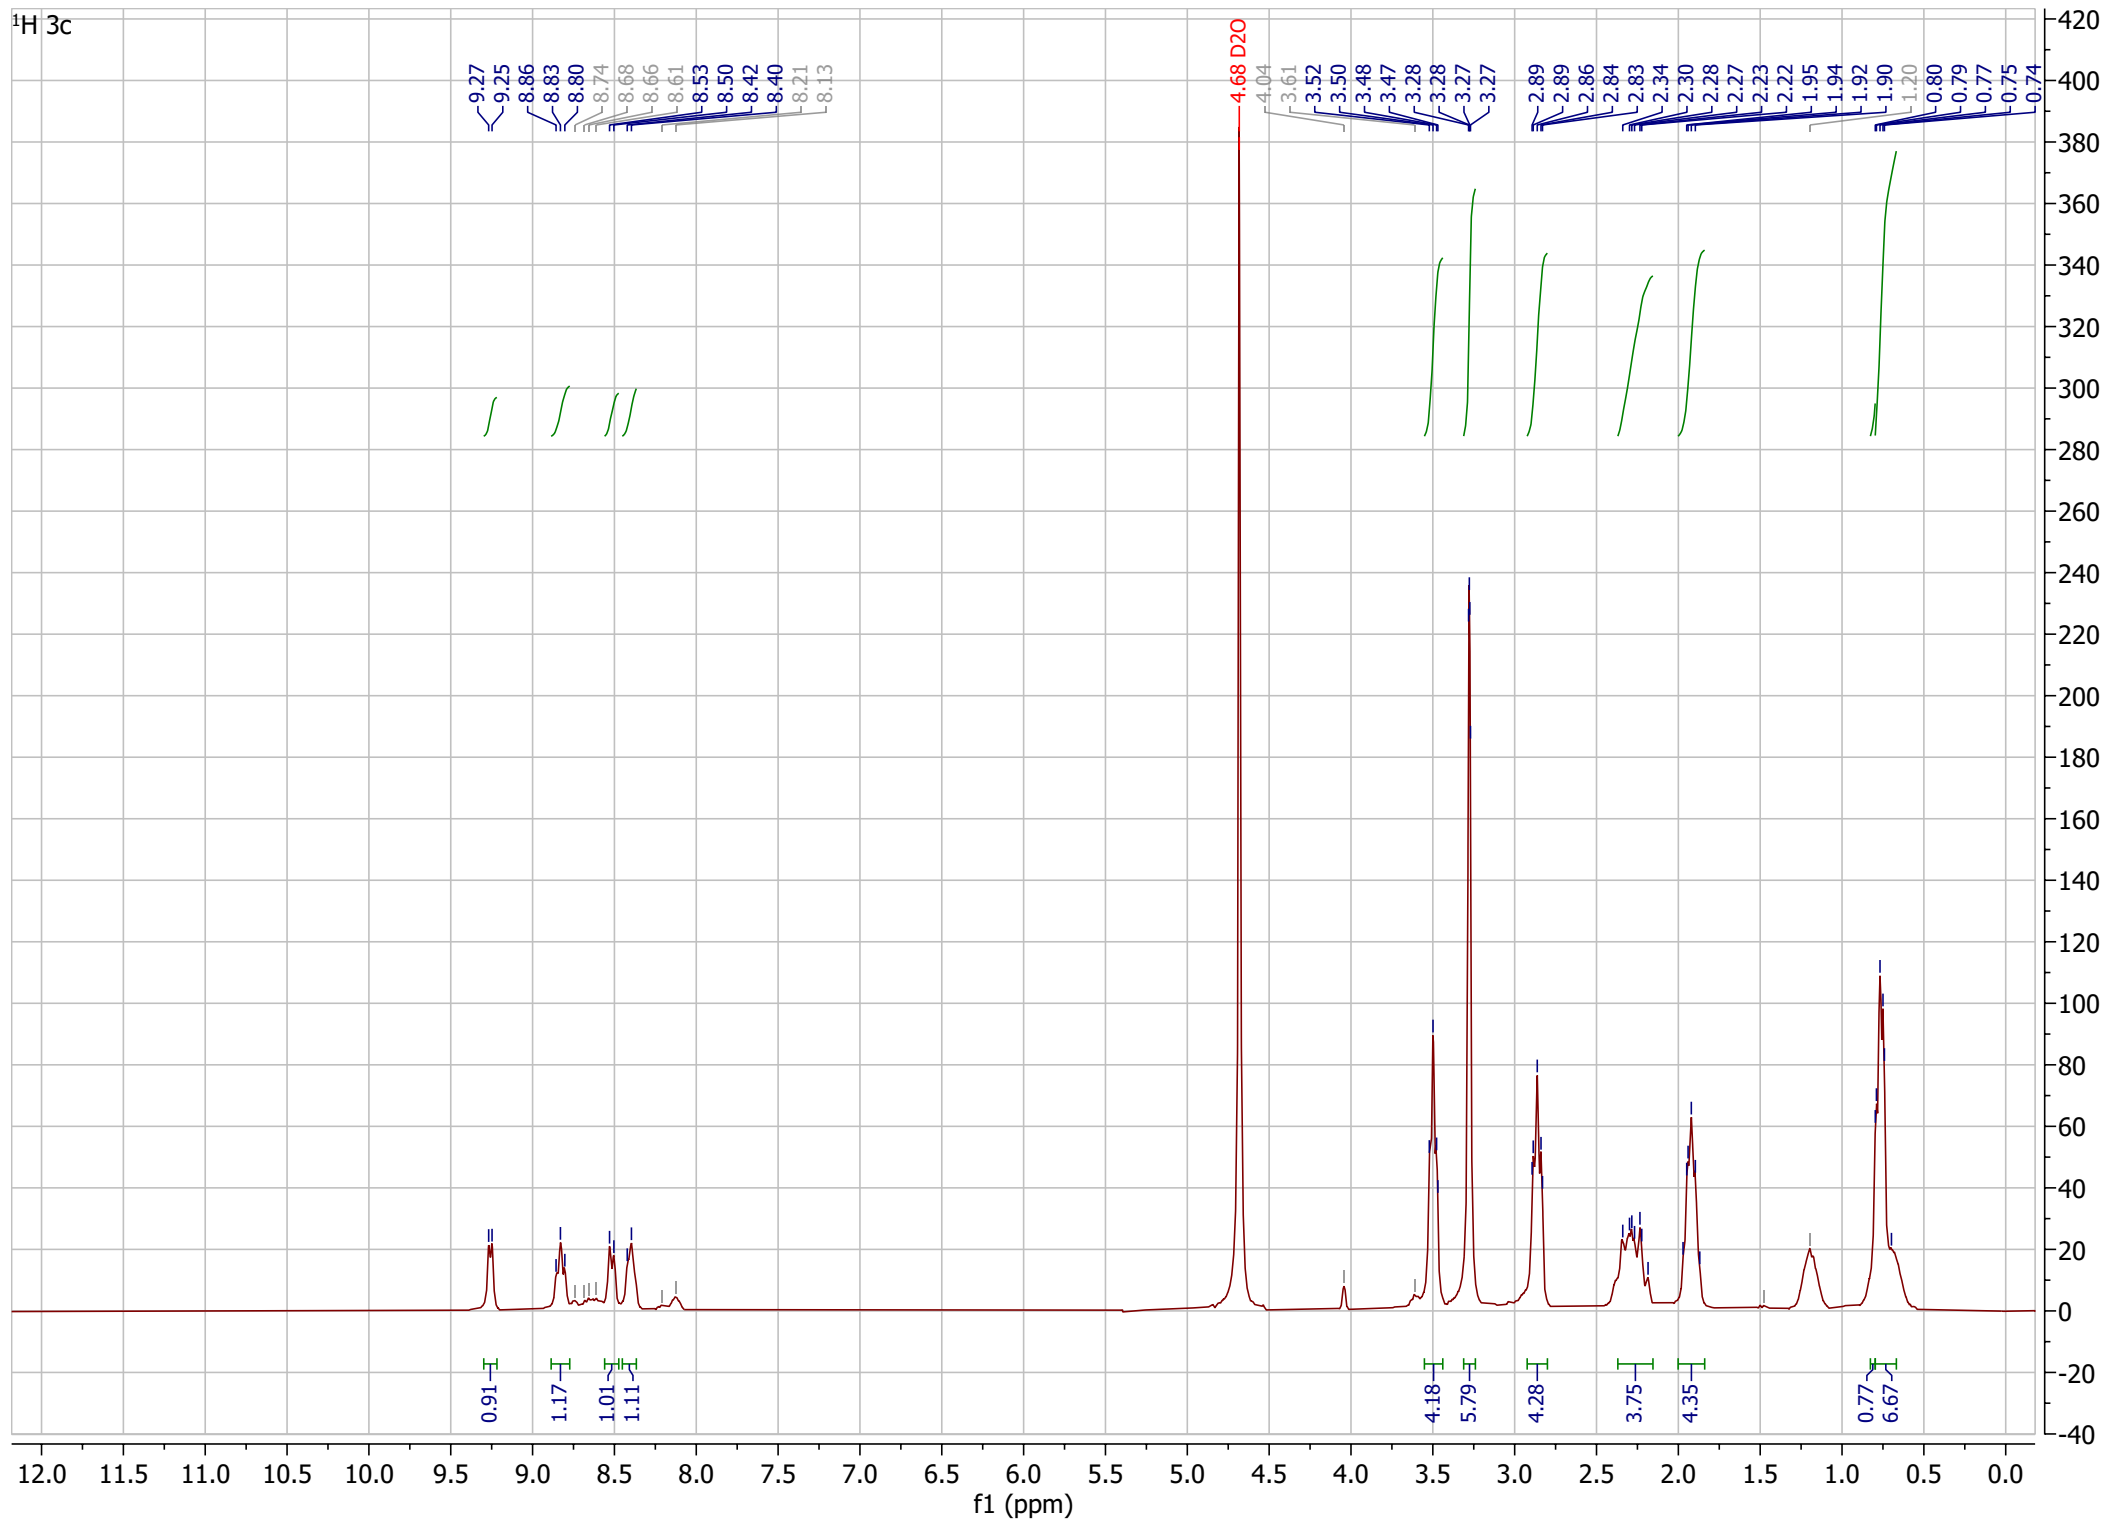

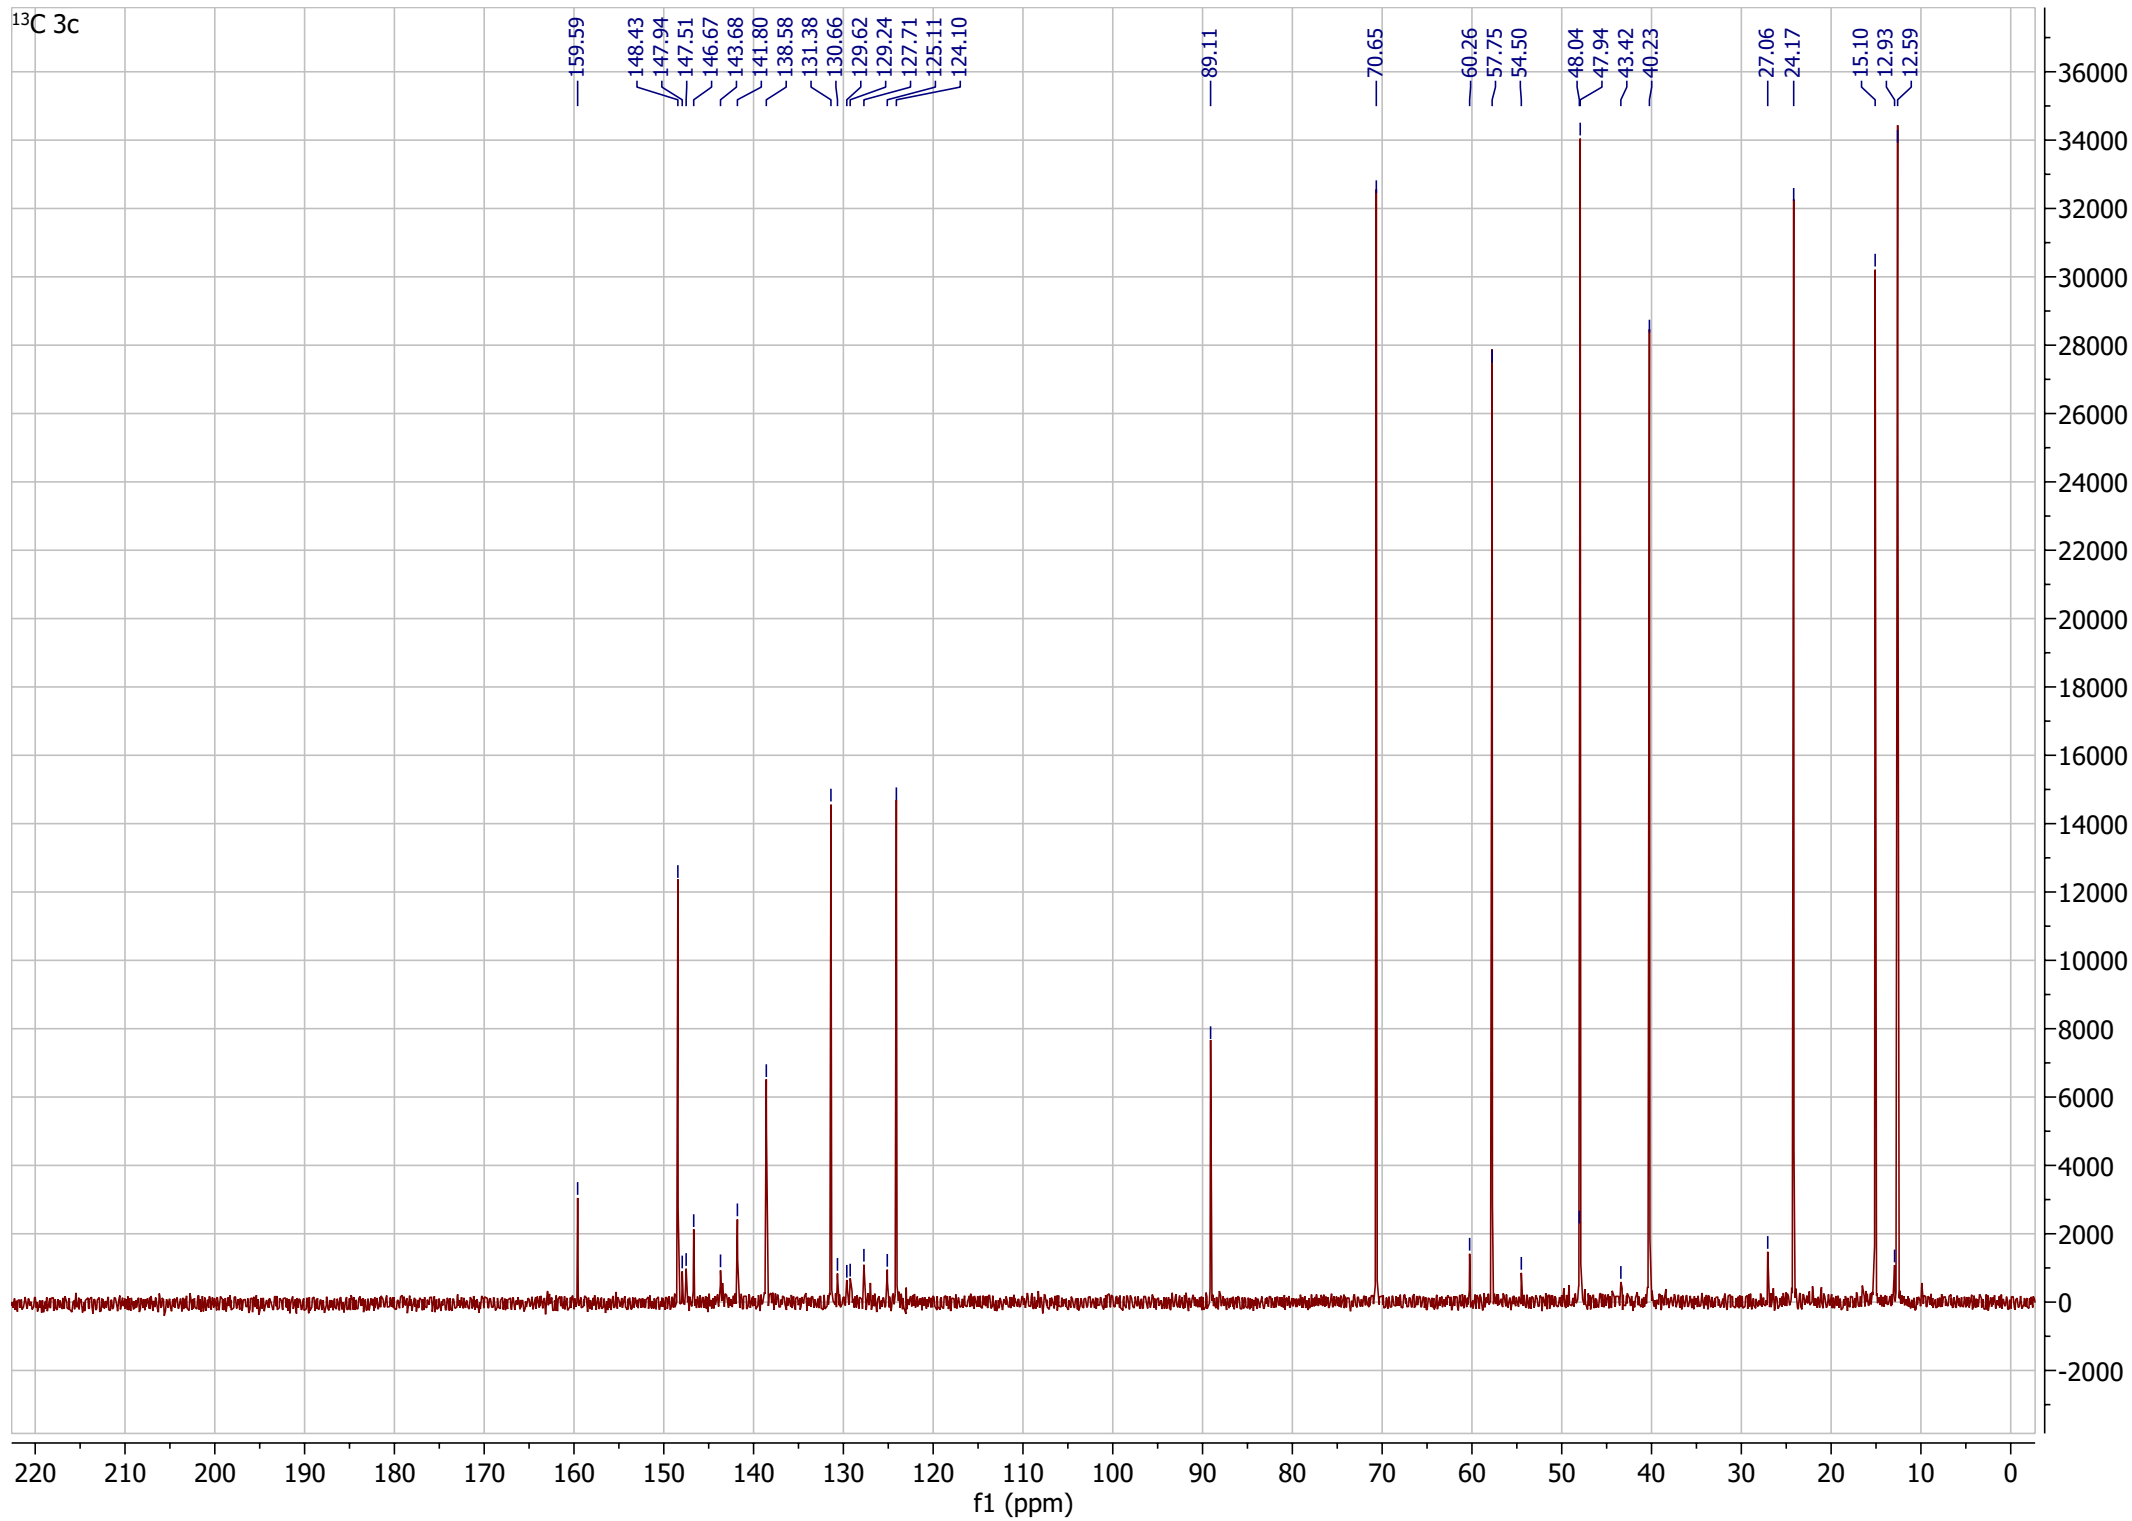

<sup>1</sup>H 3d

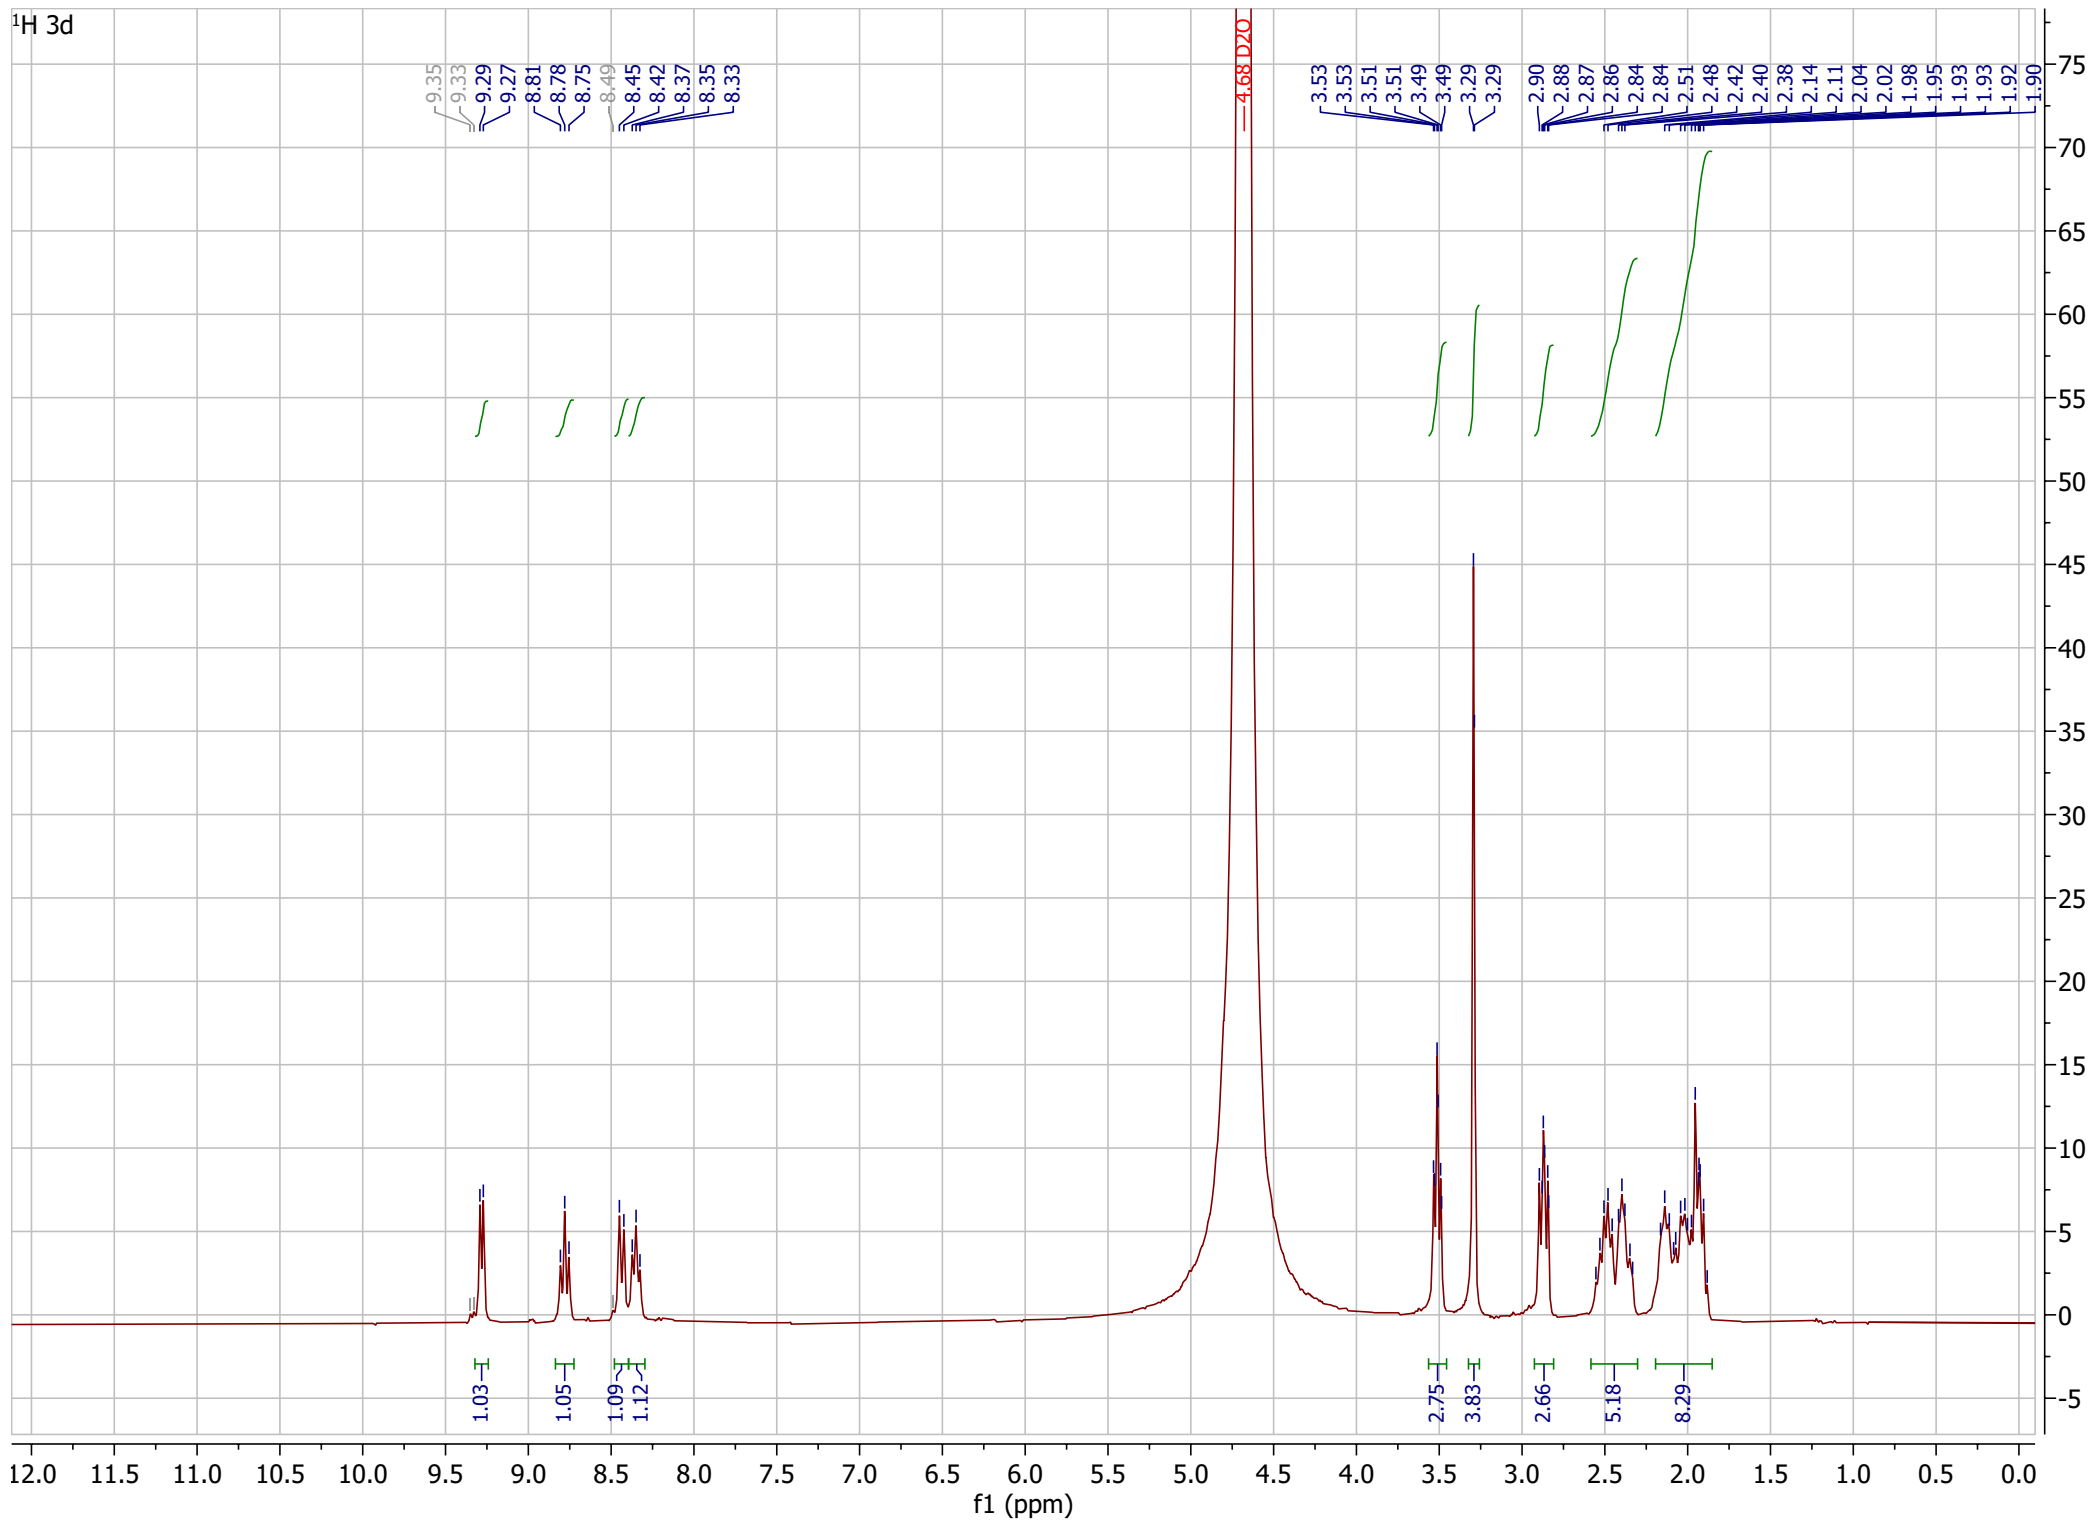

<sup>13</sup>C 3d

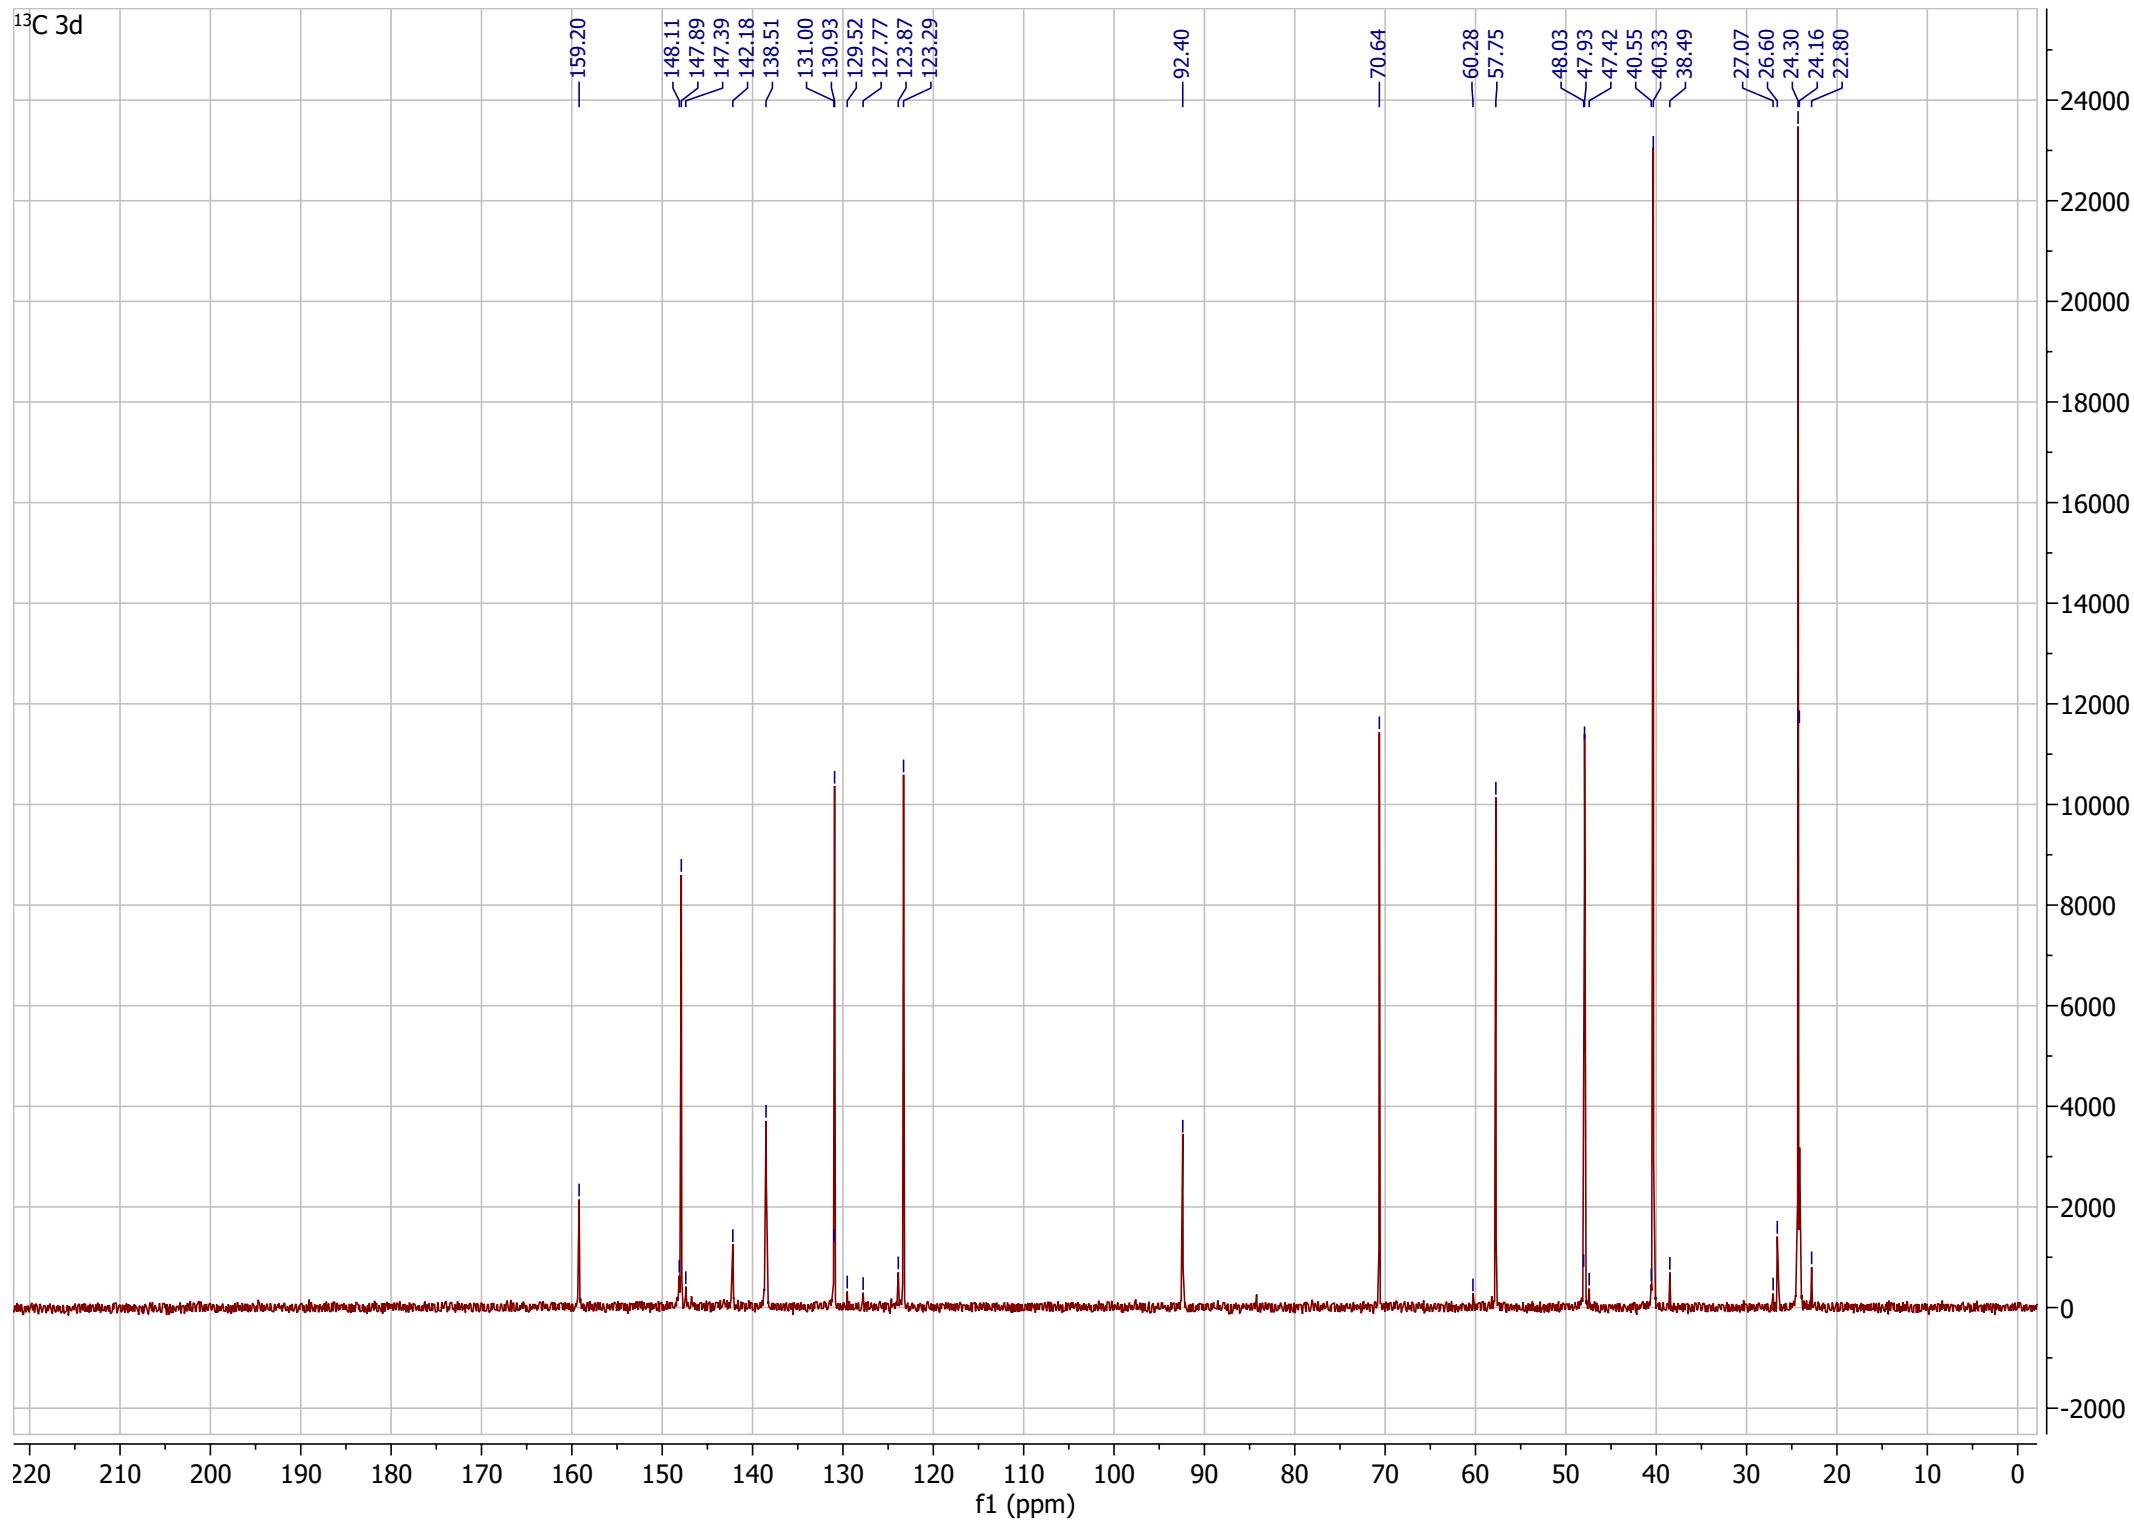

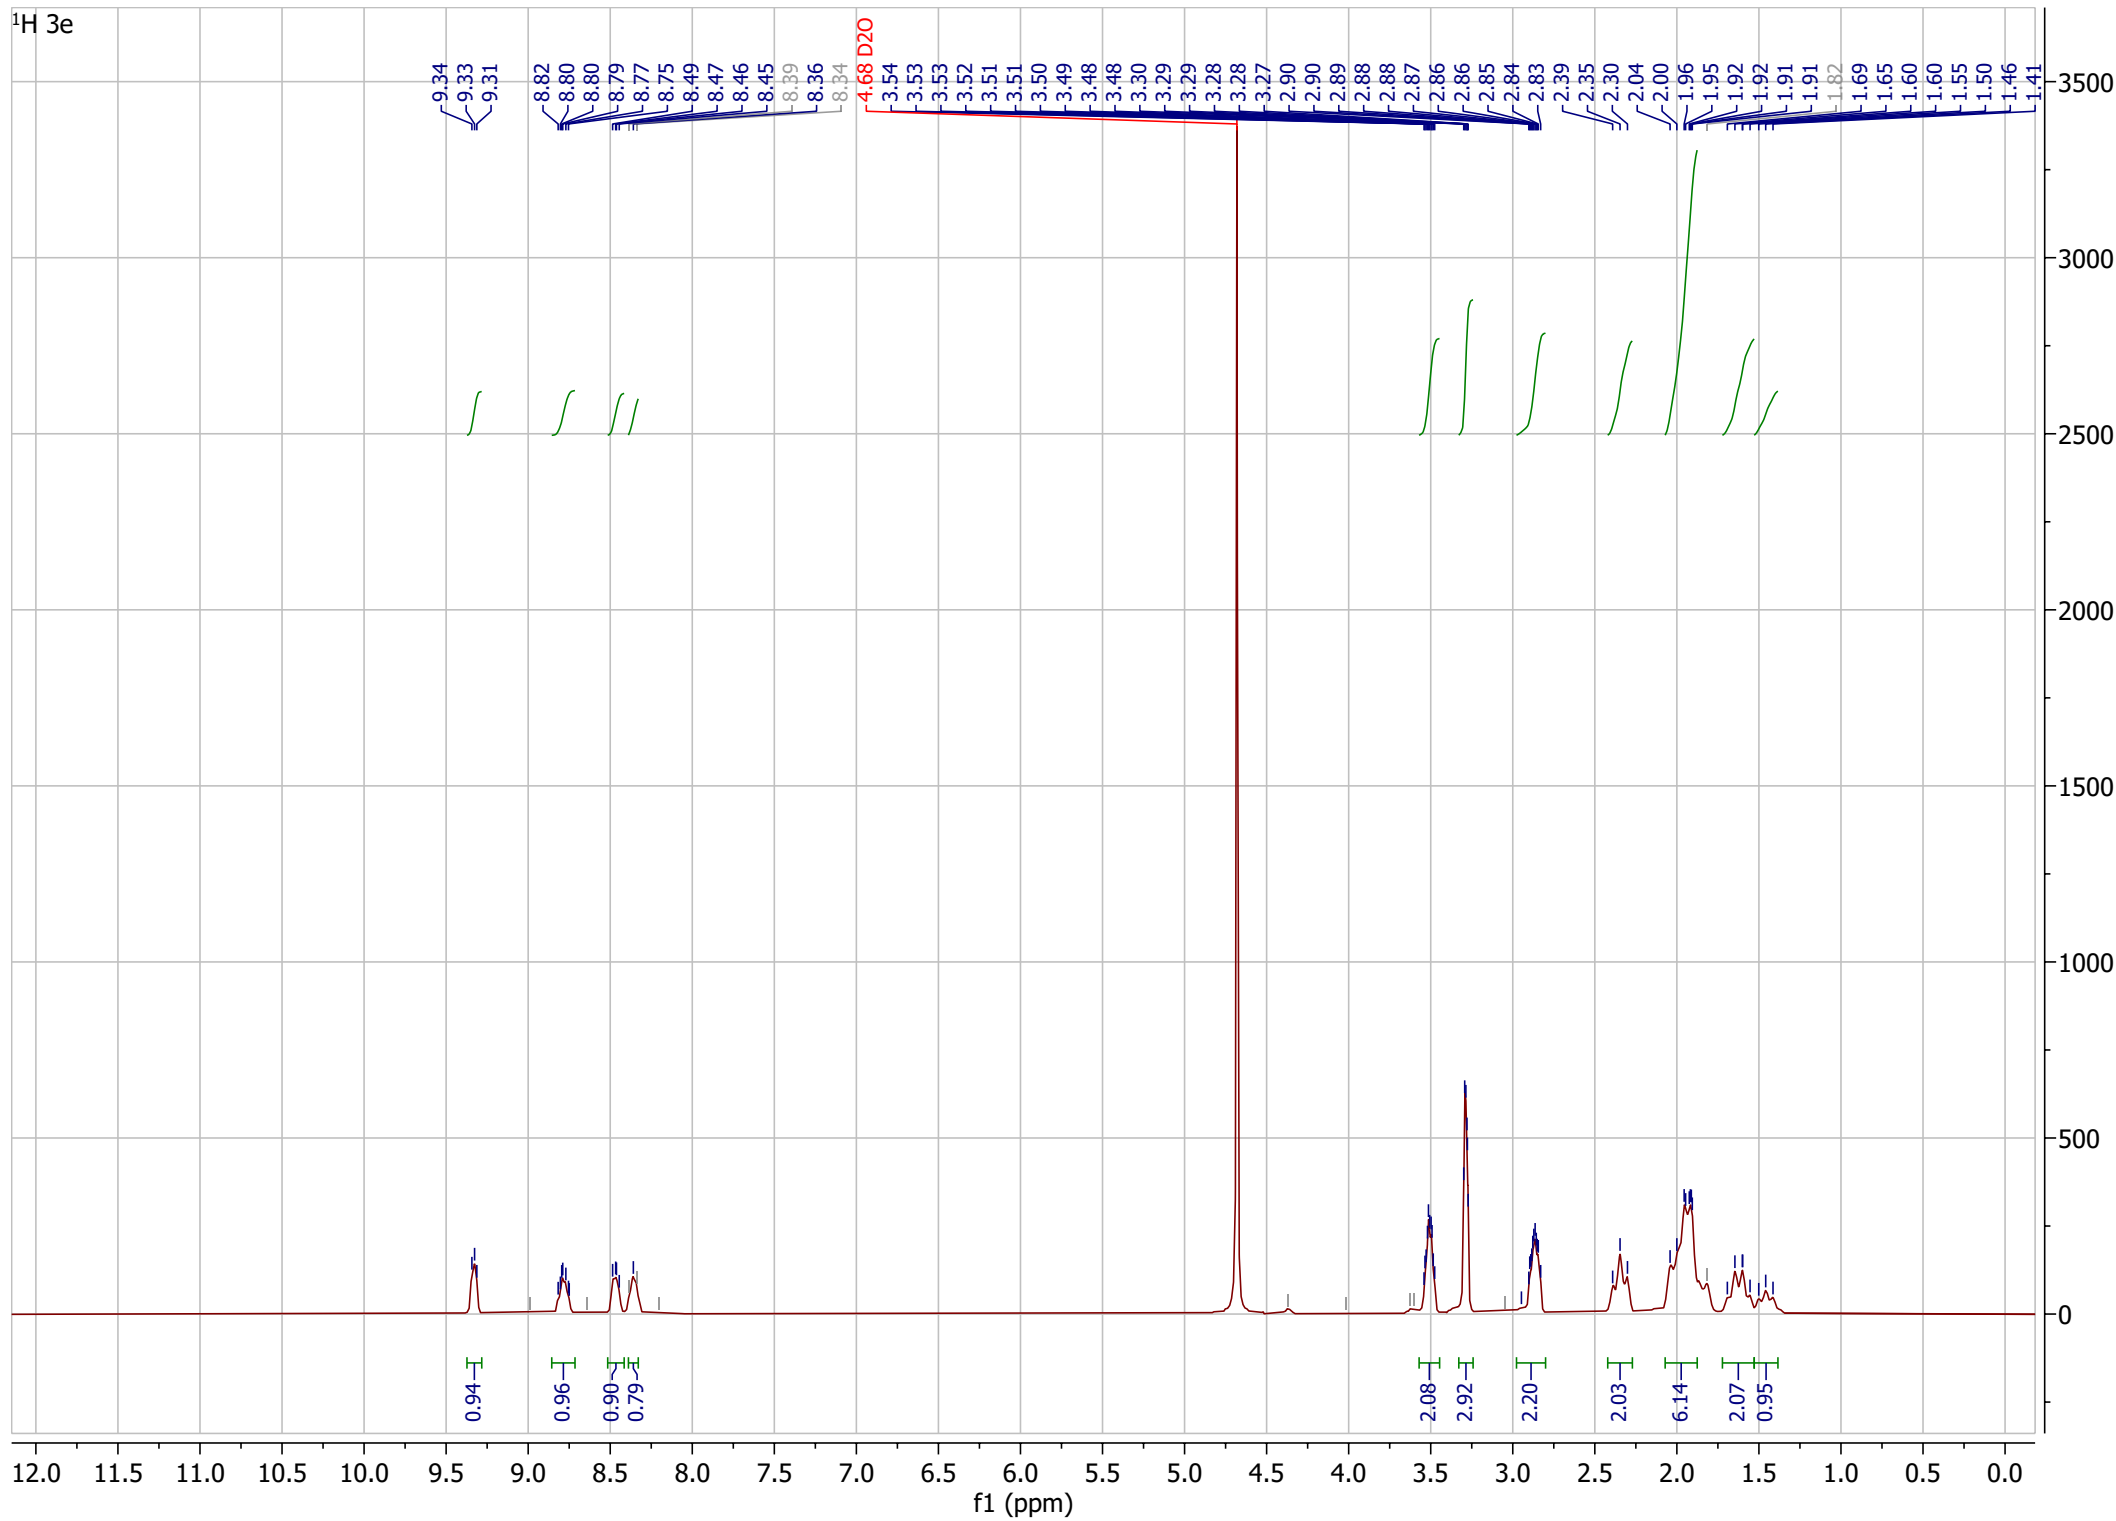

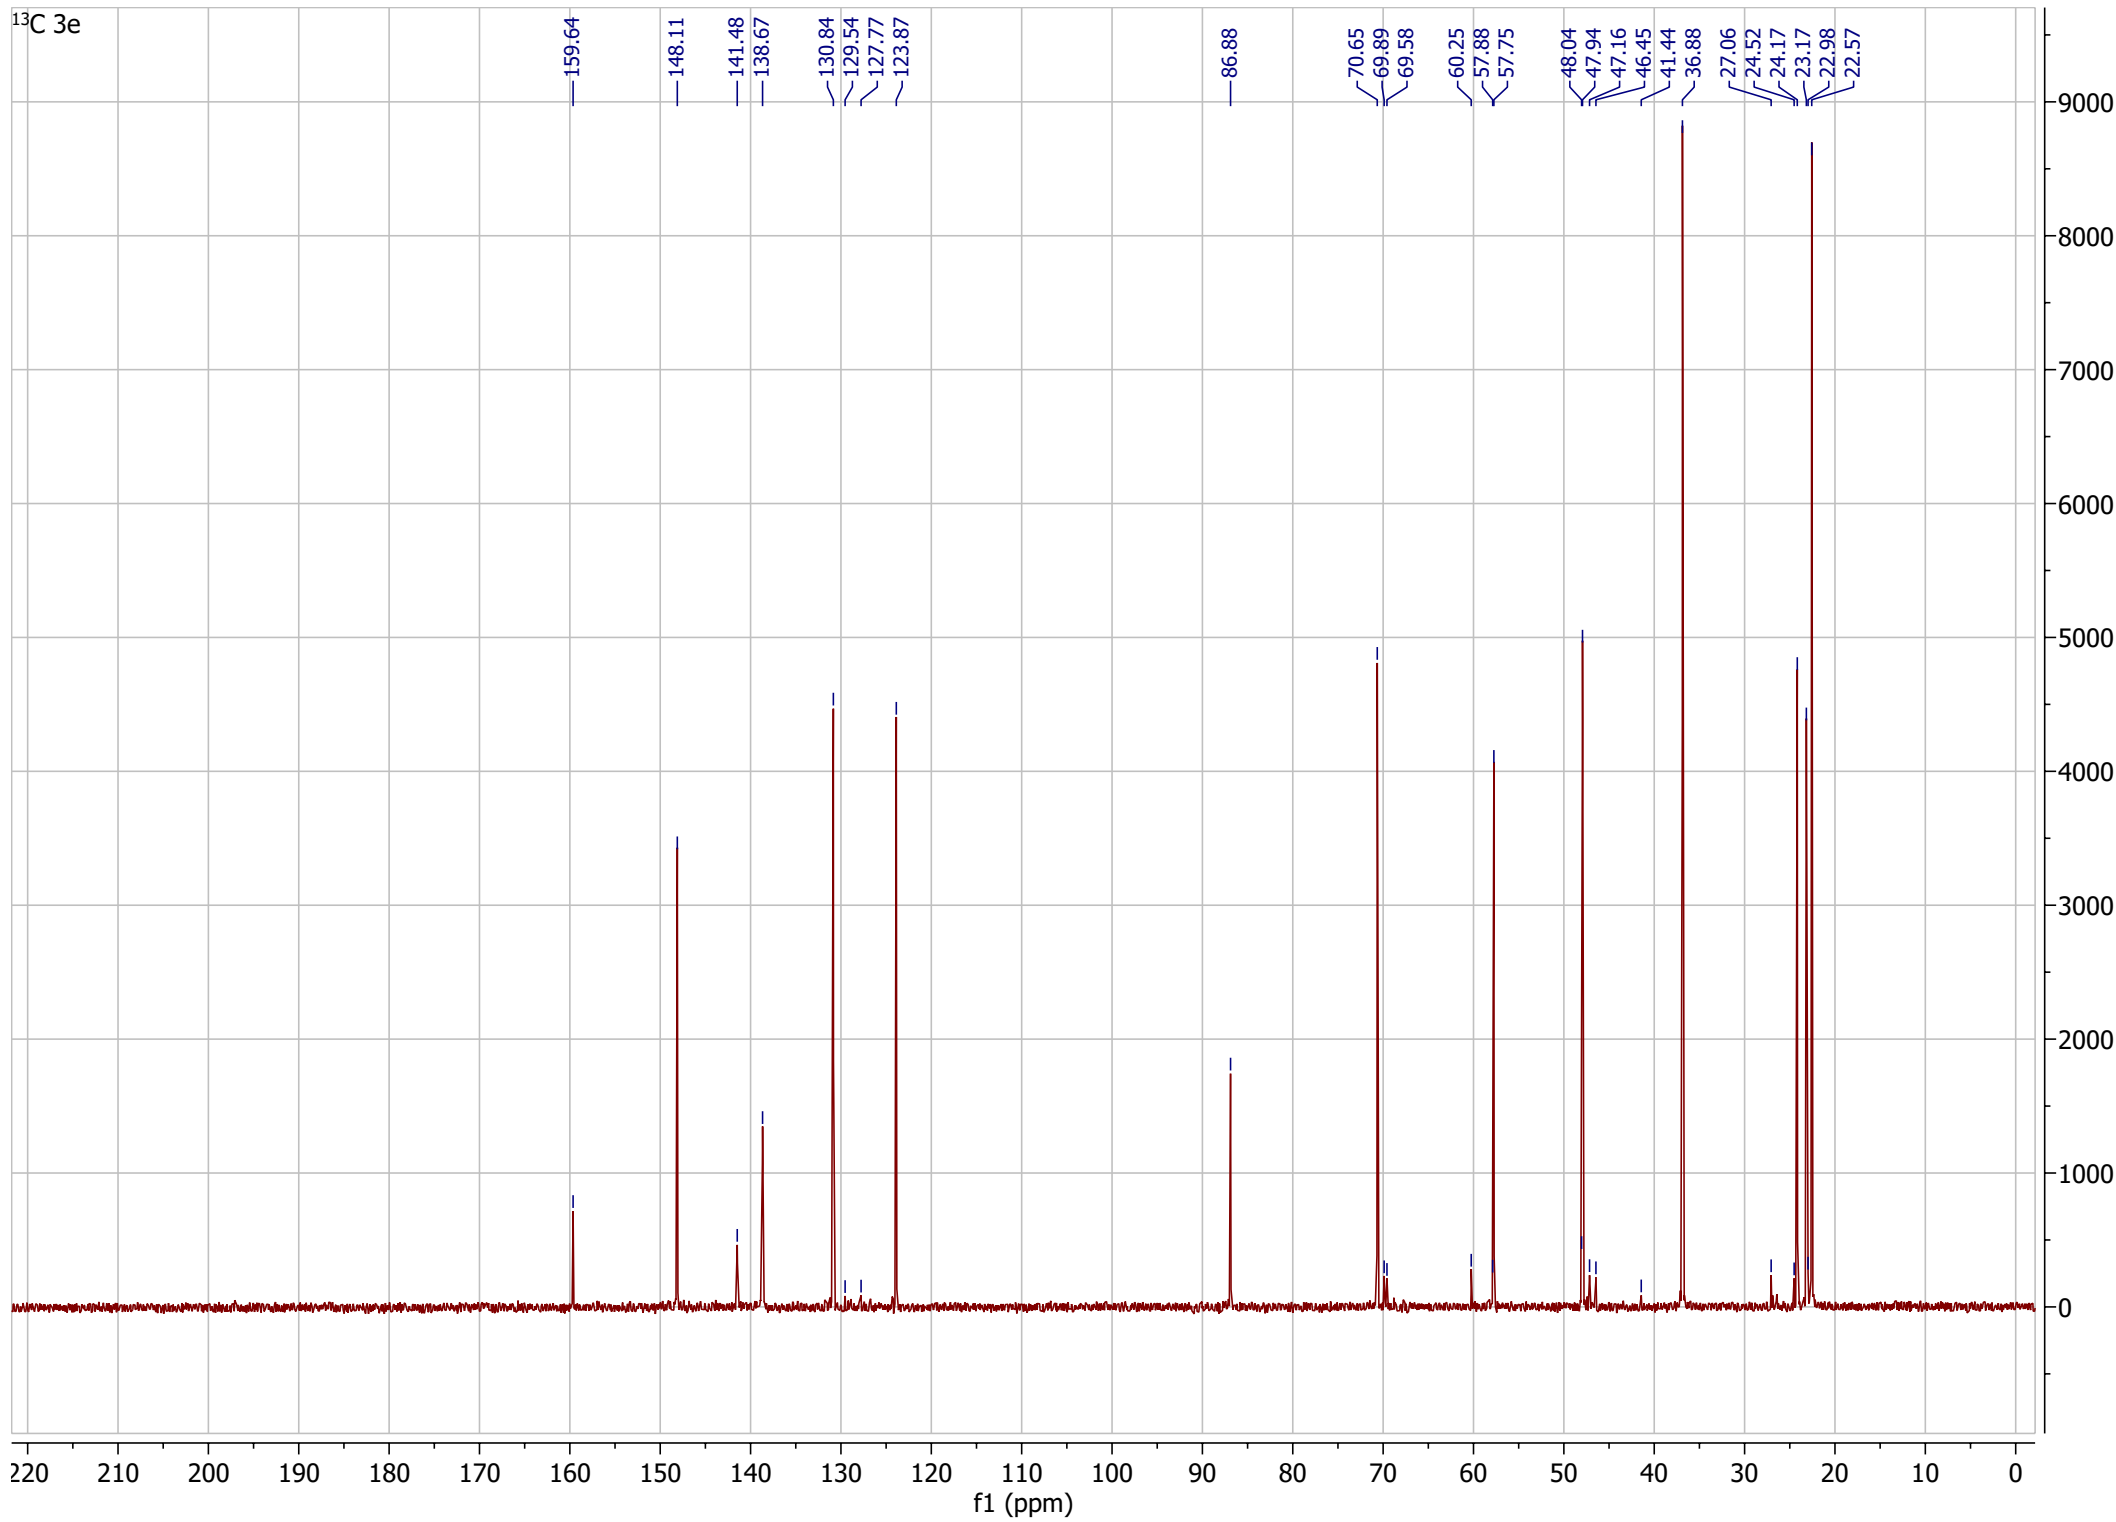



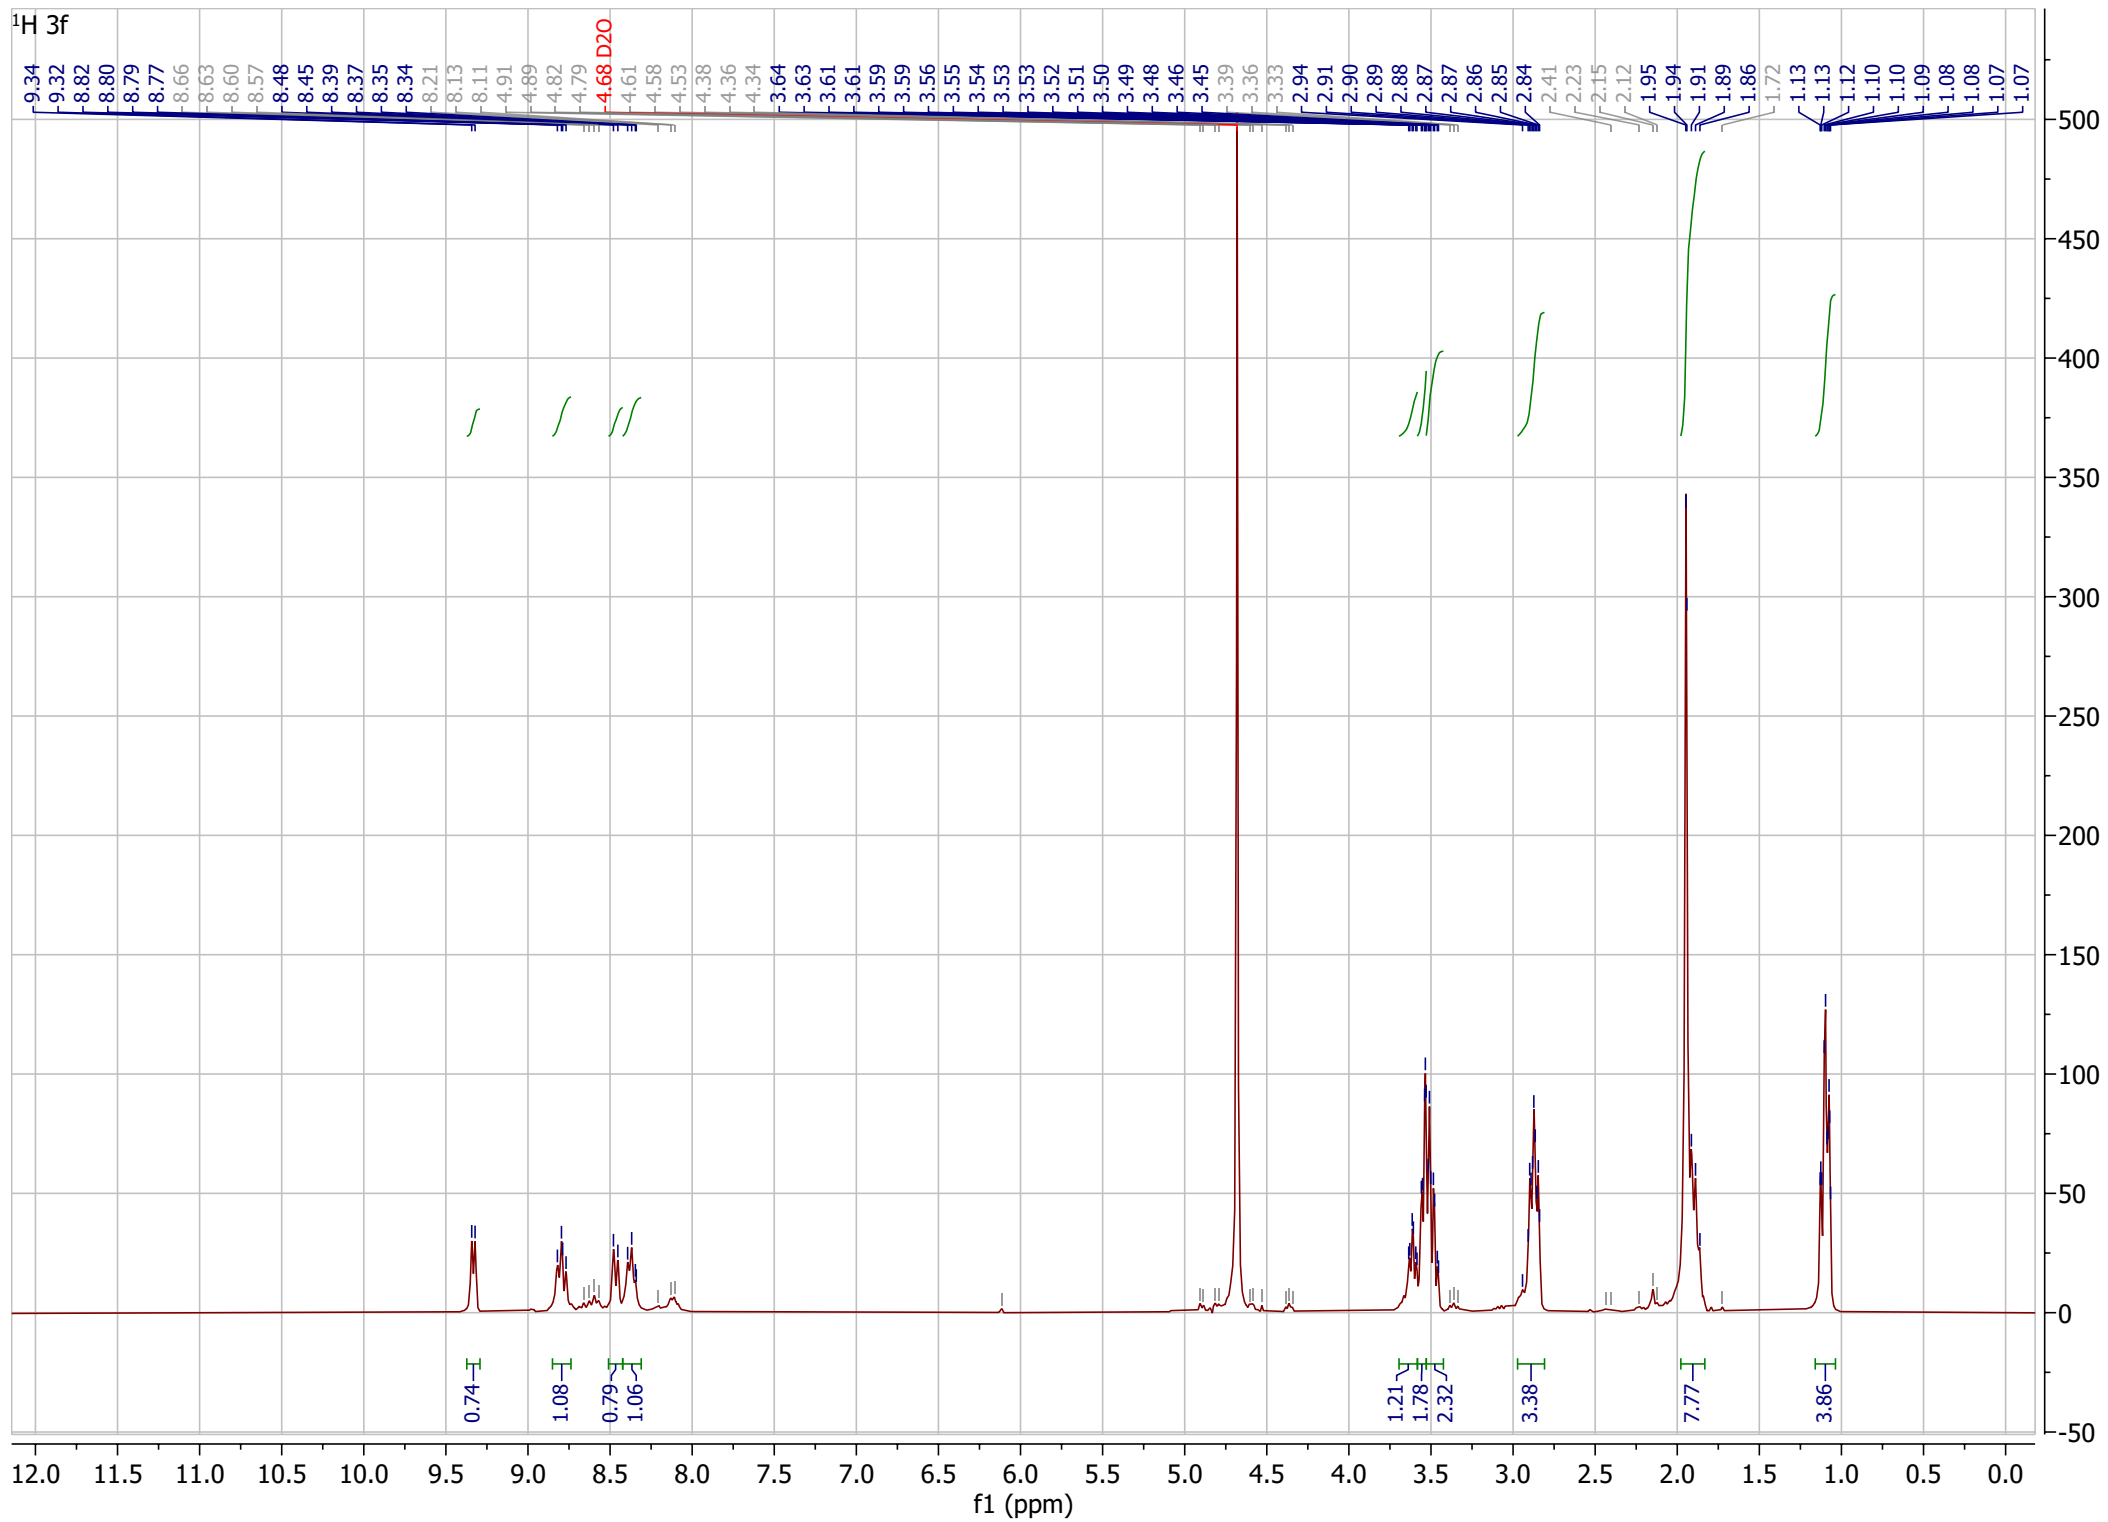

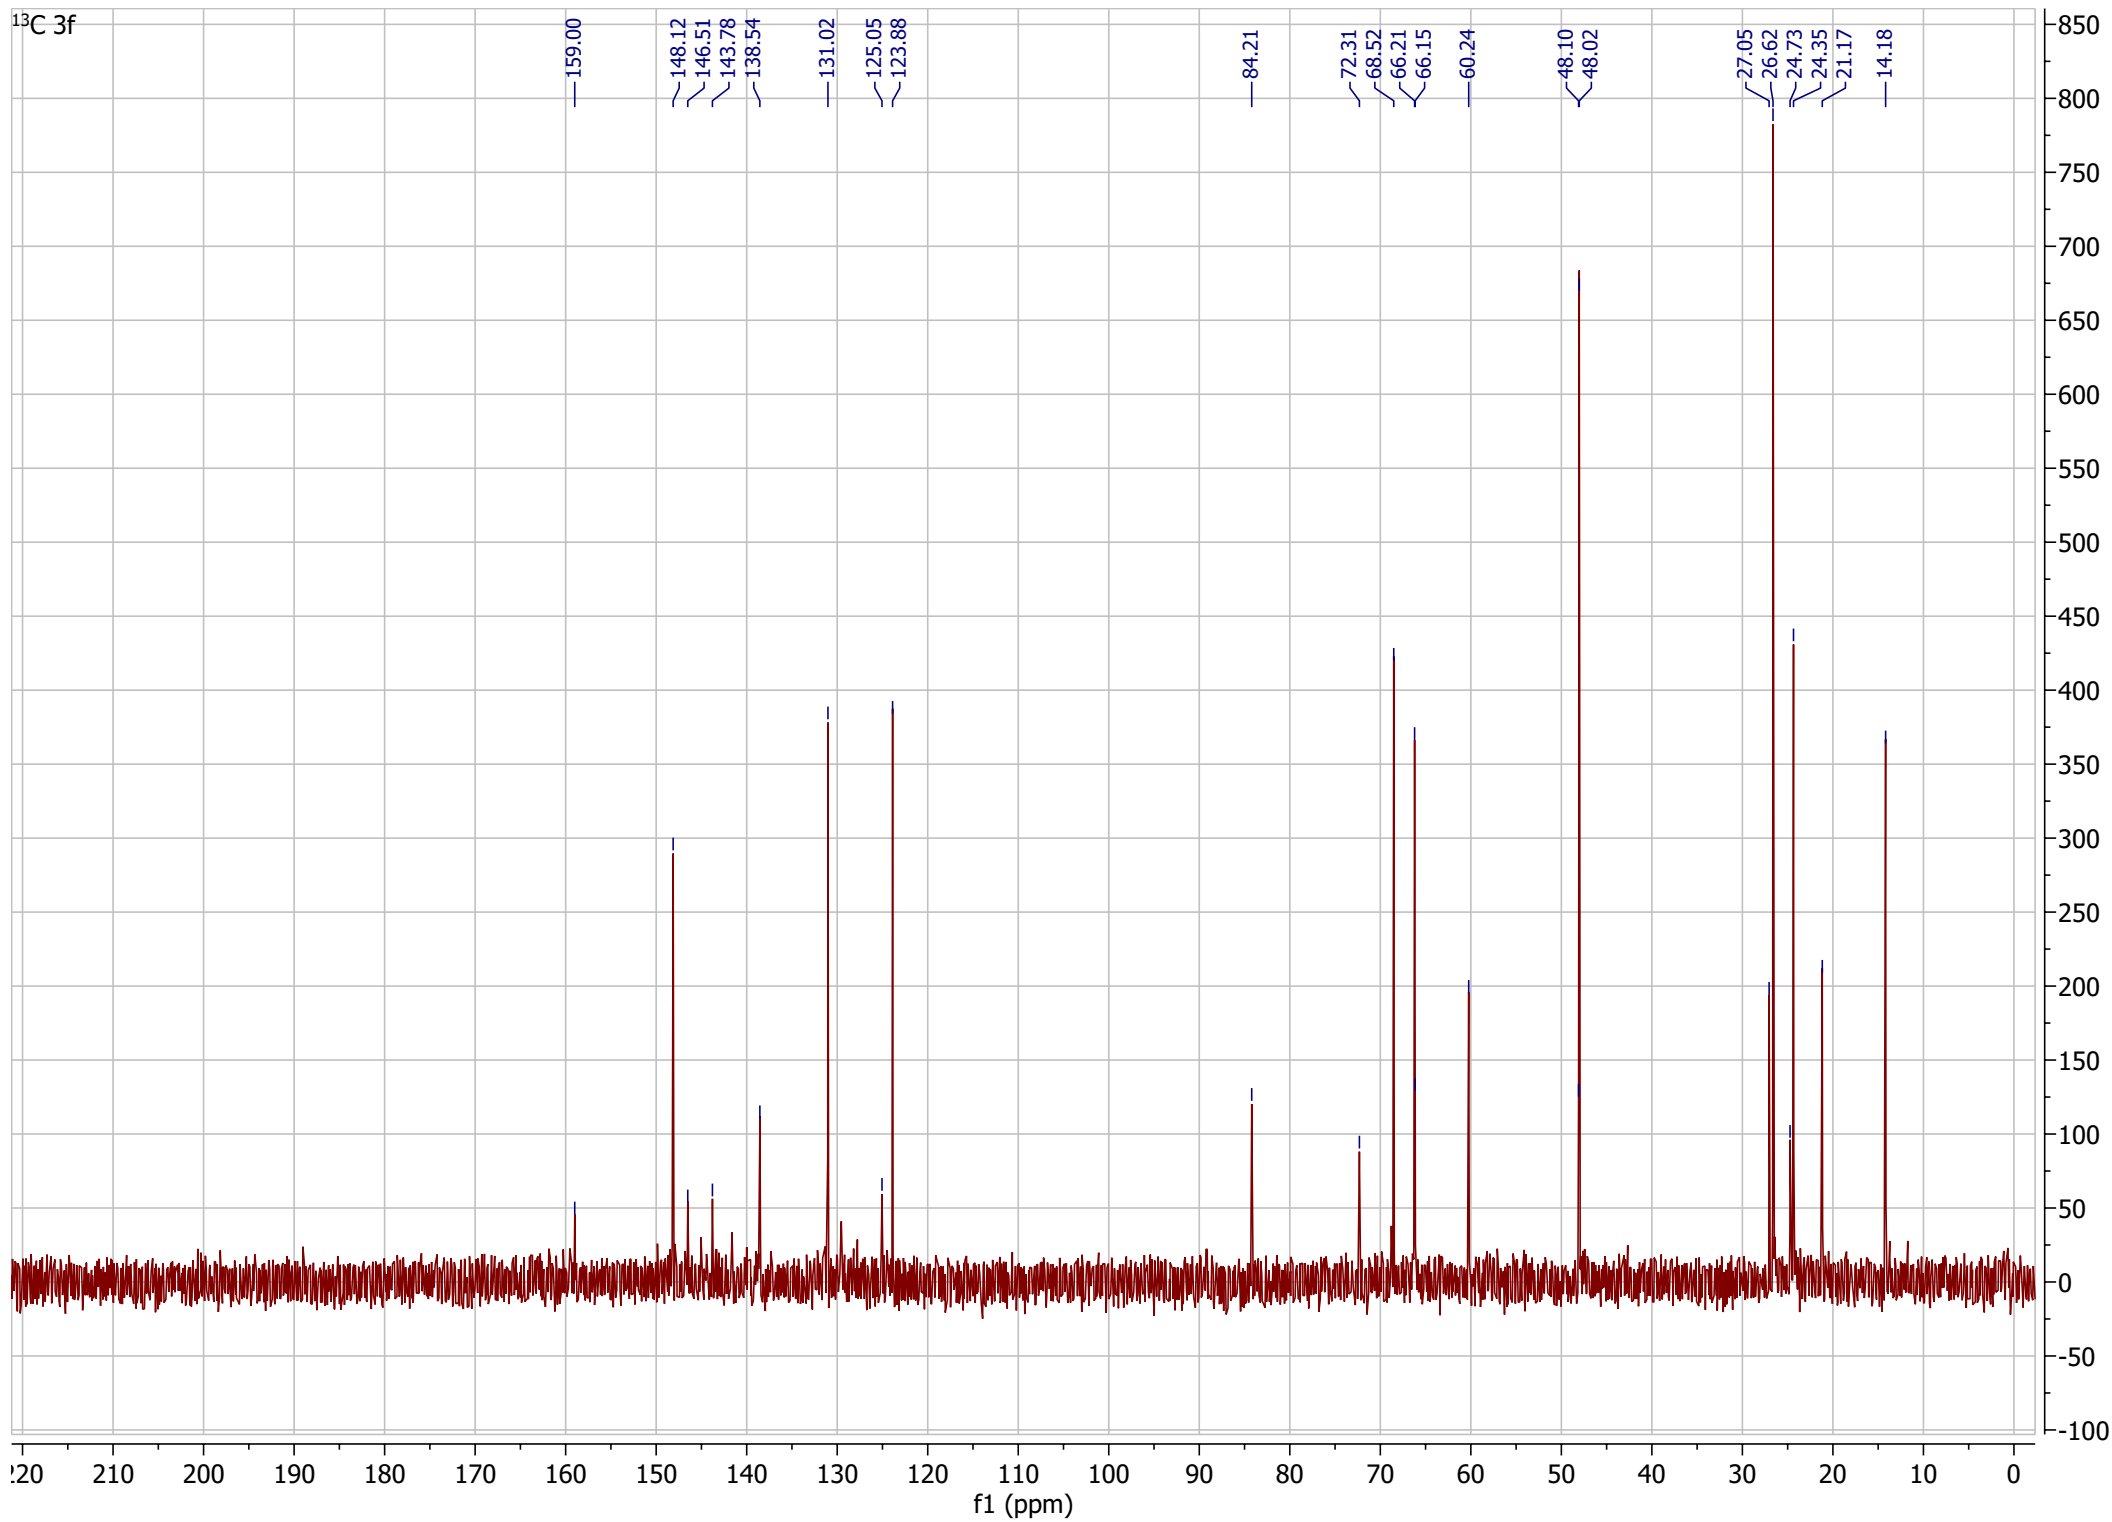

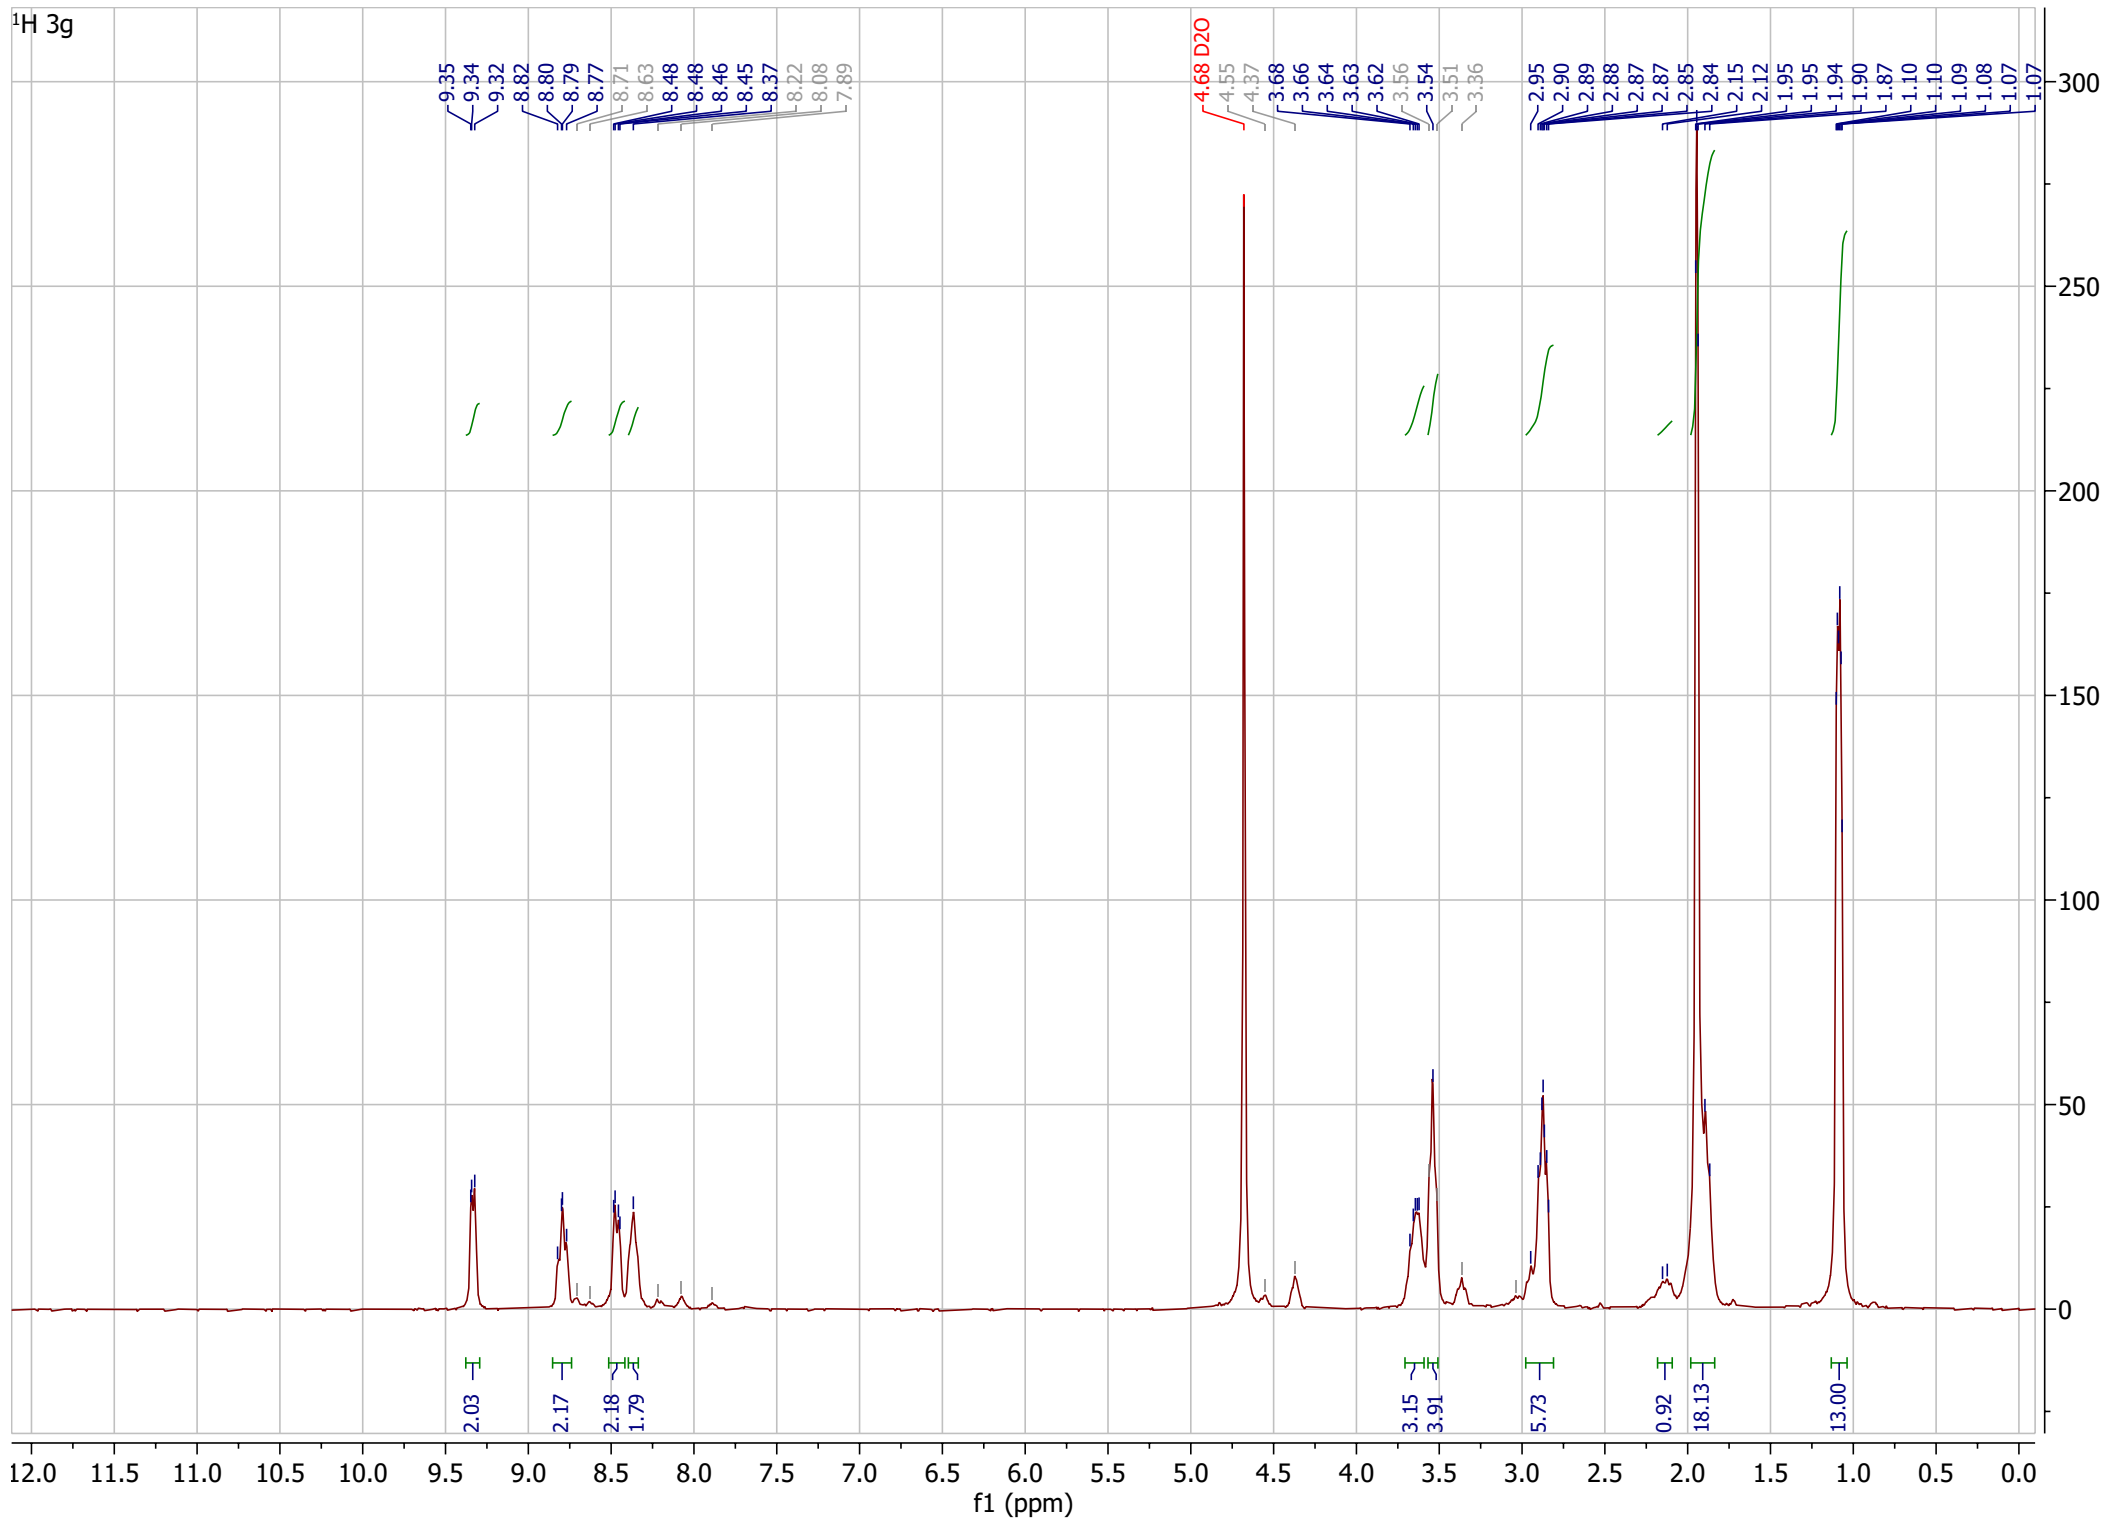

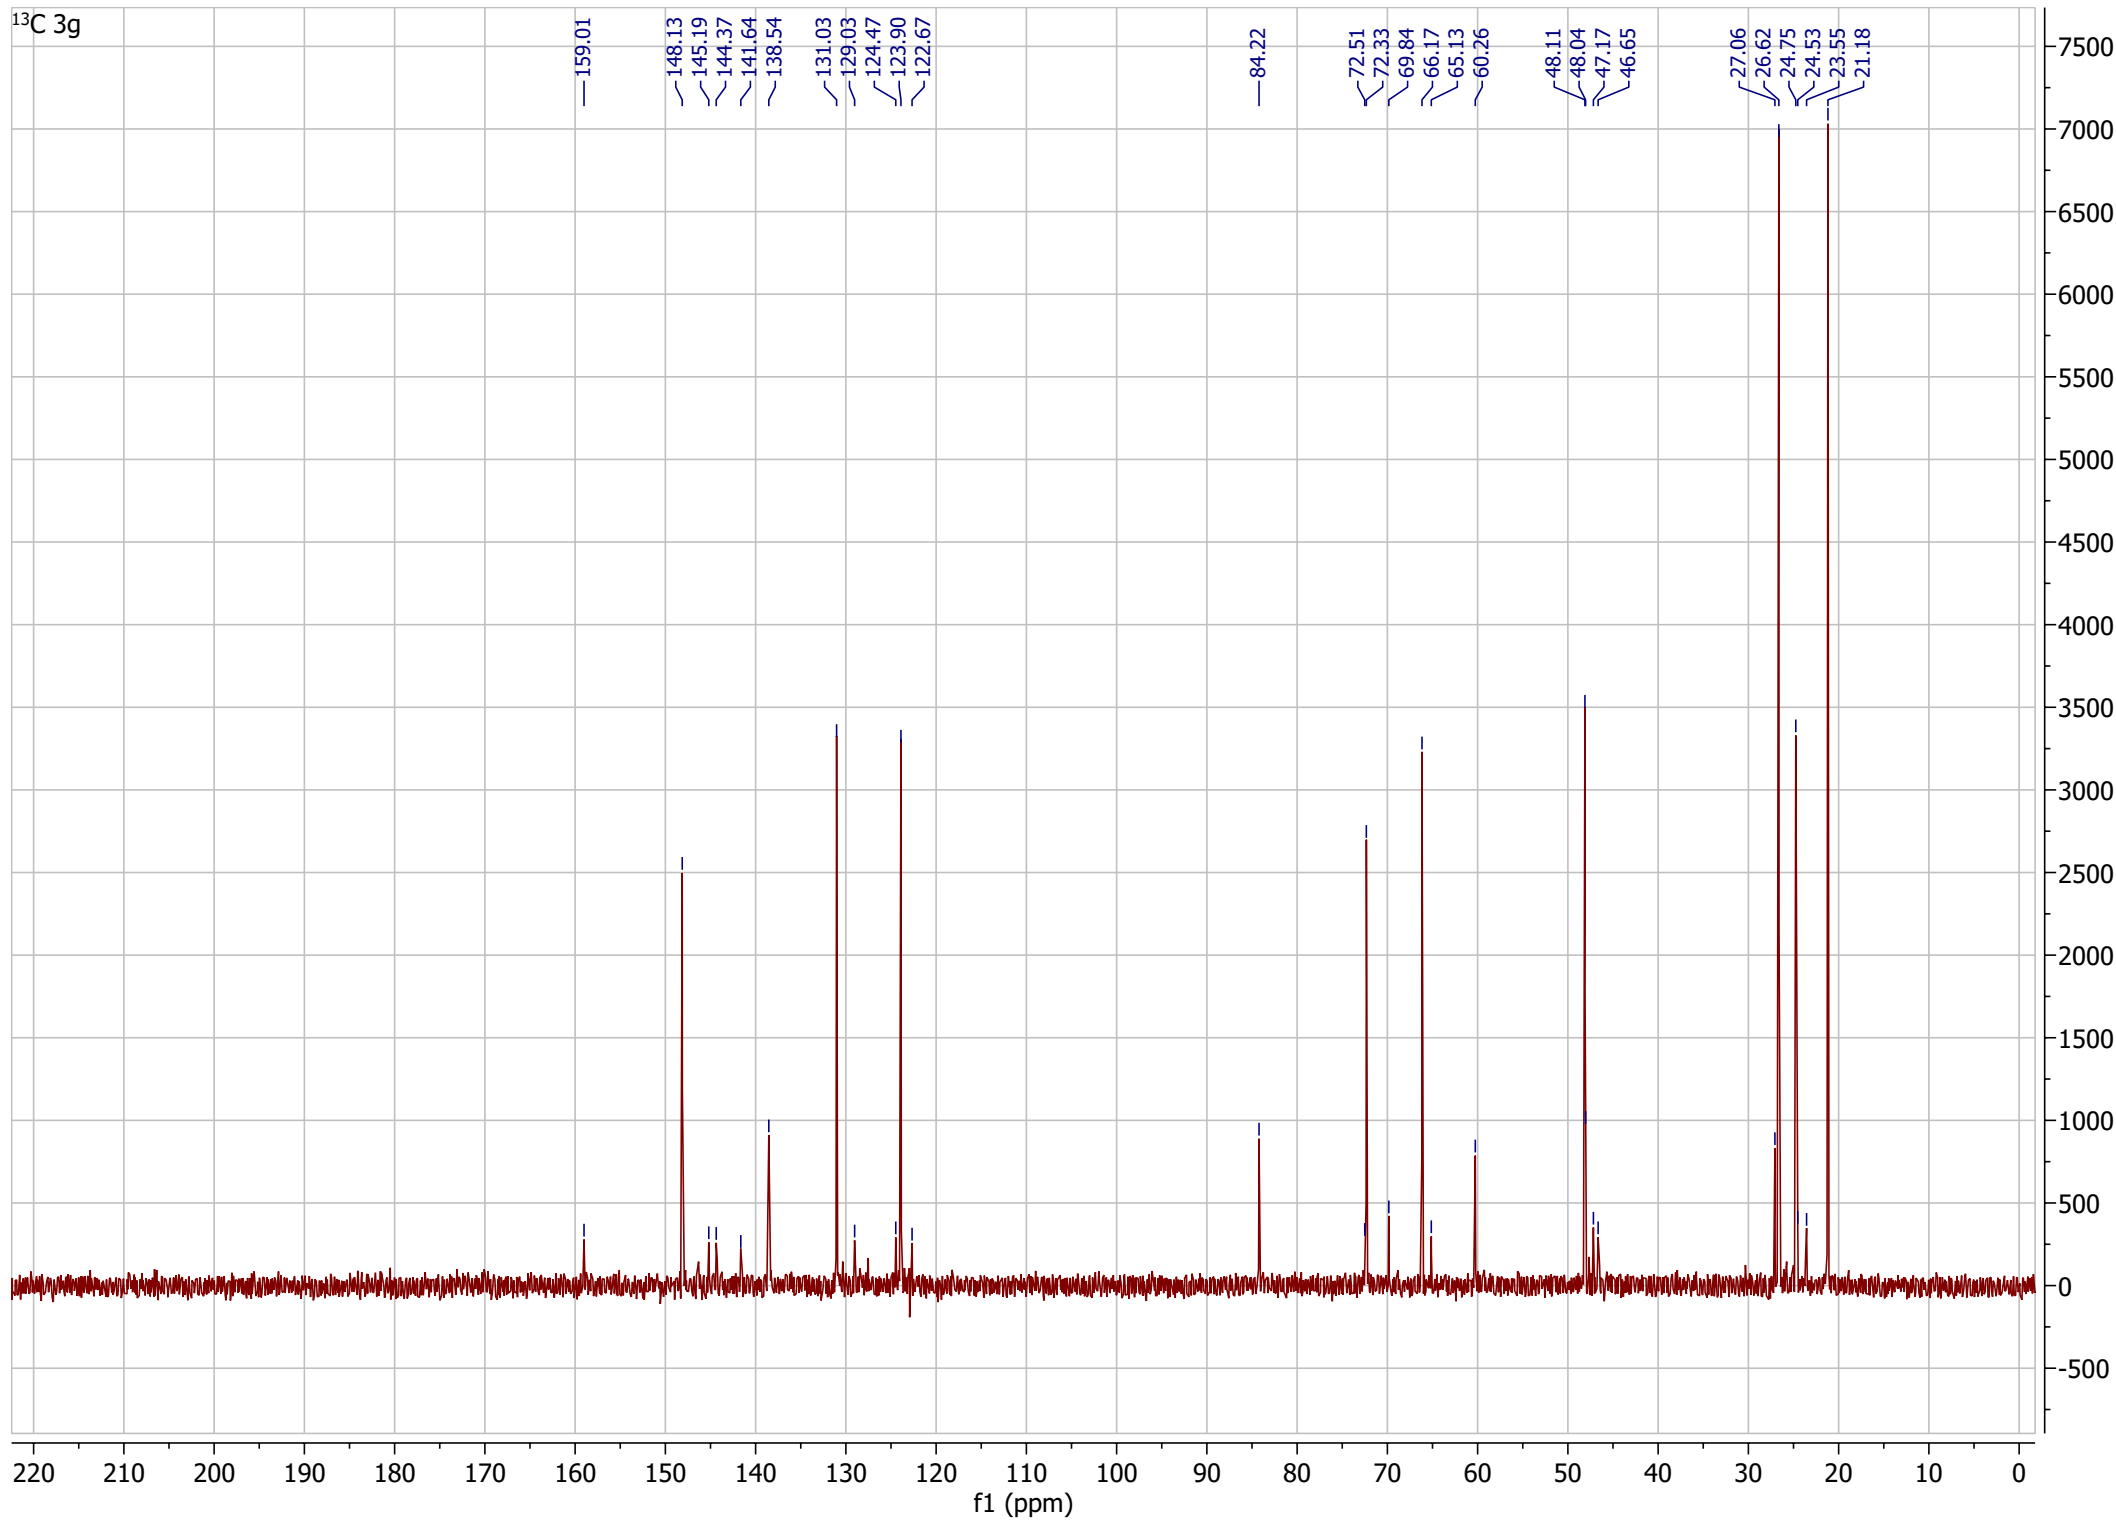

<sup>1</sup>H 3h

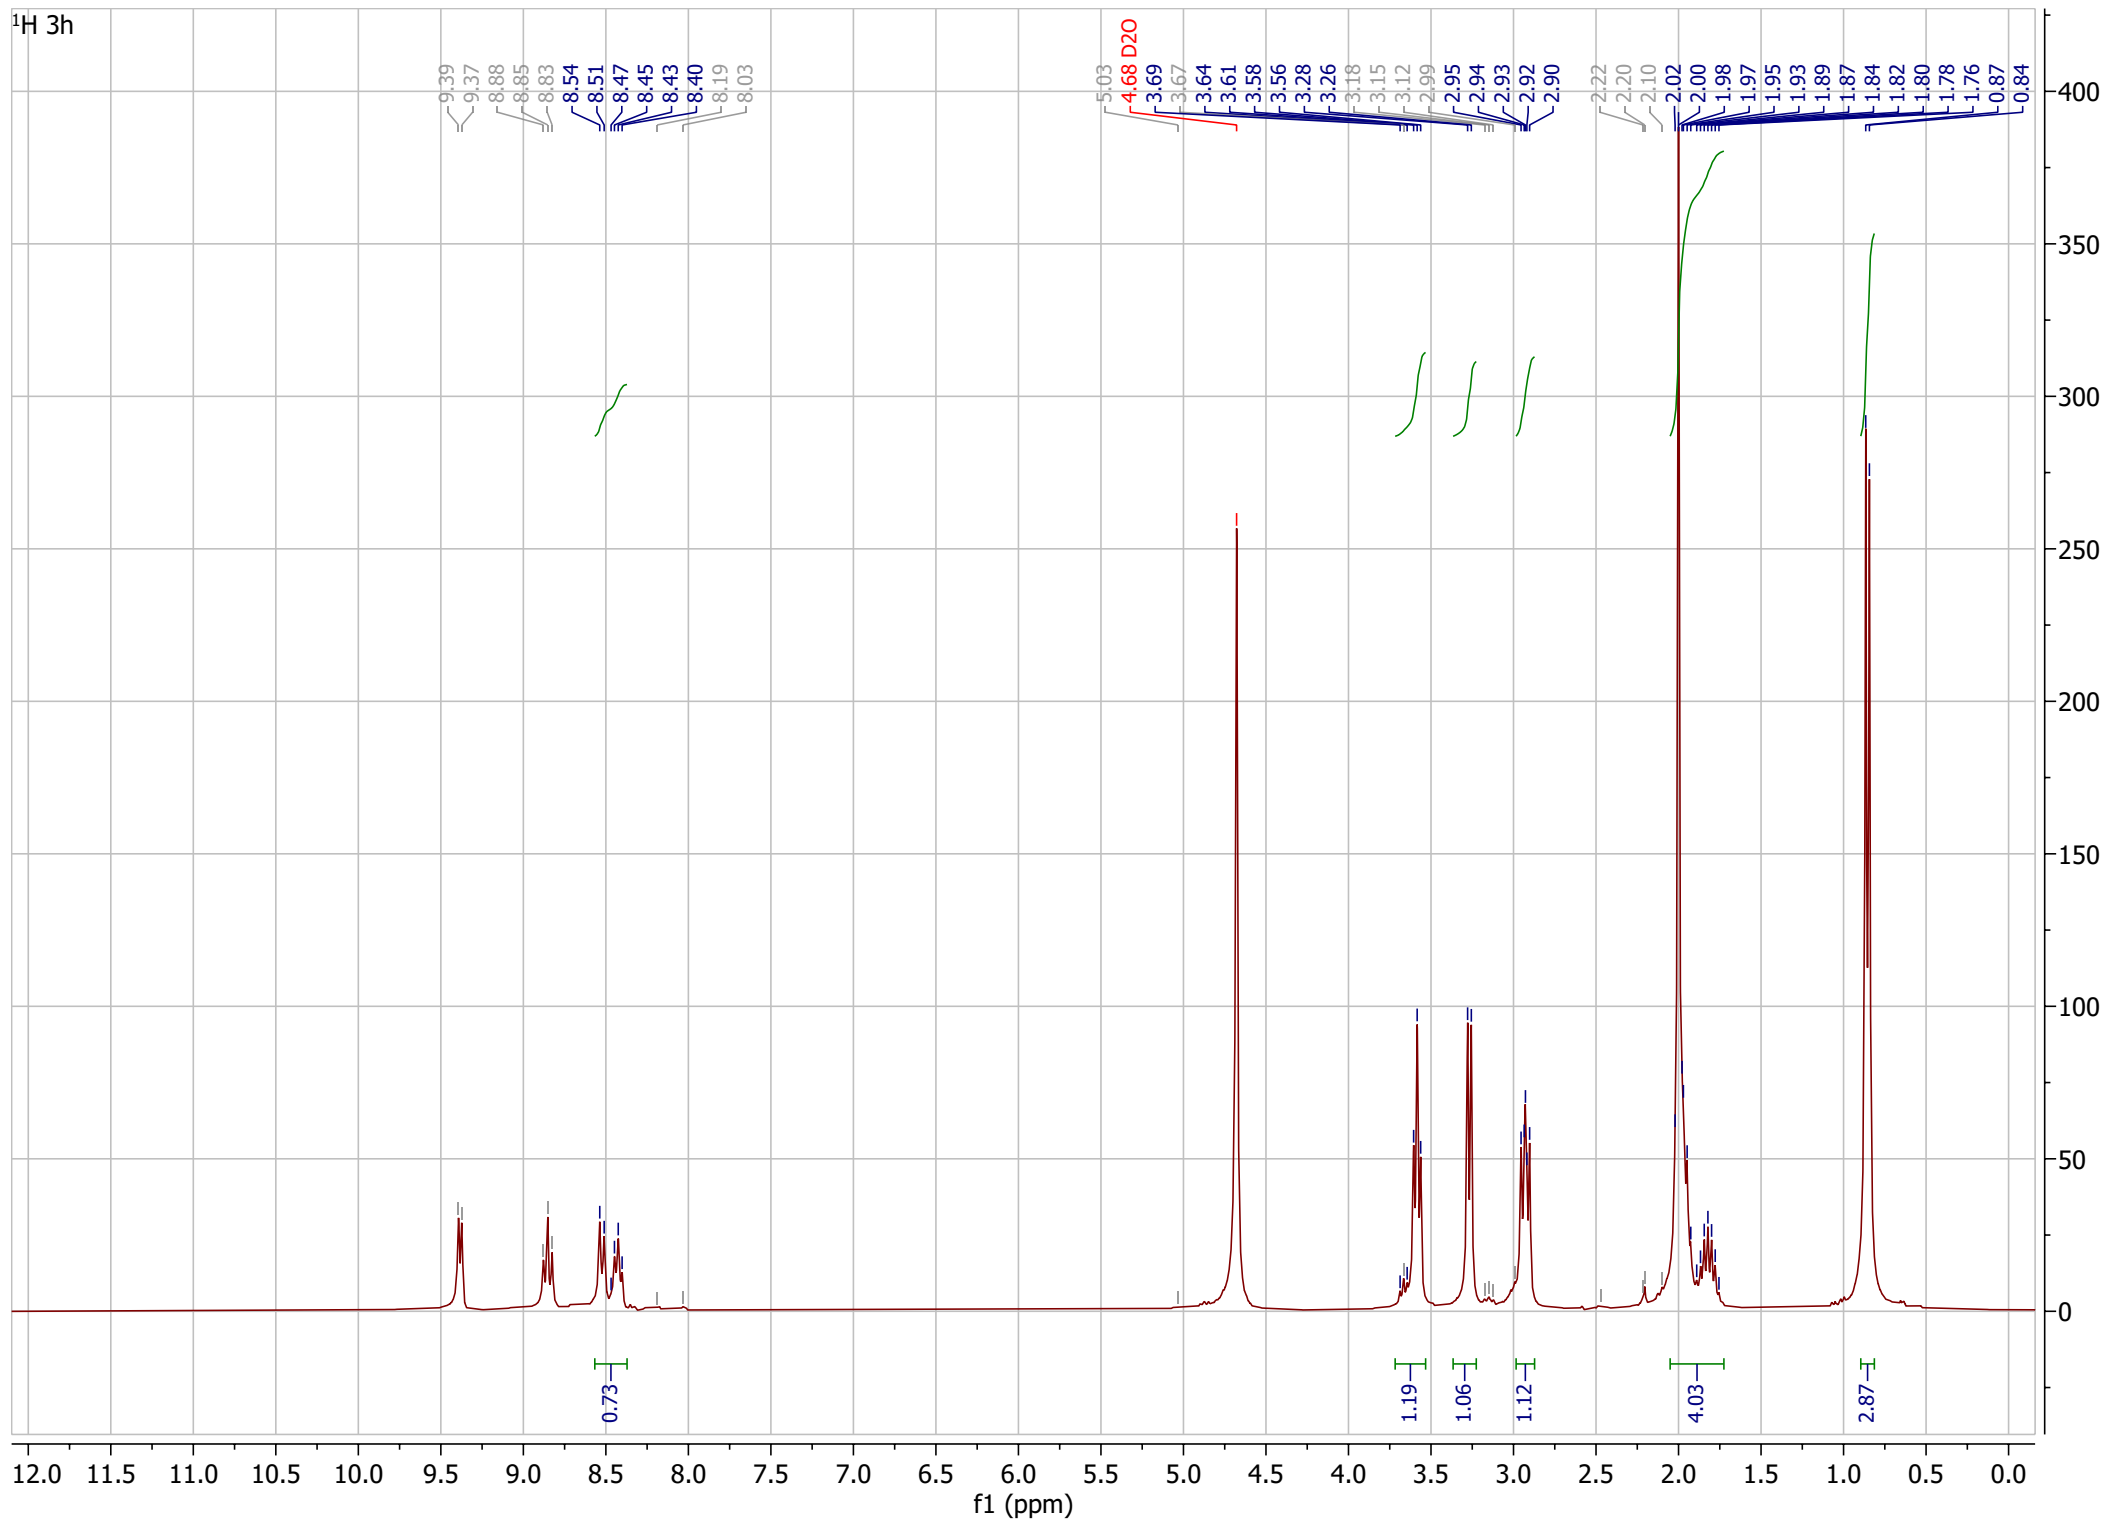

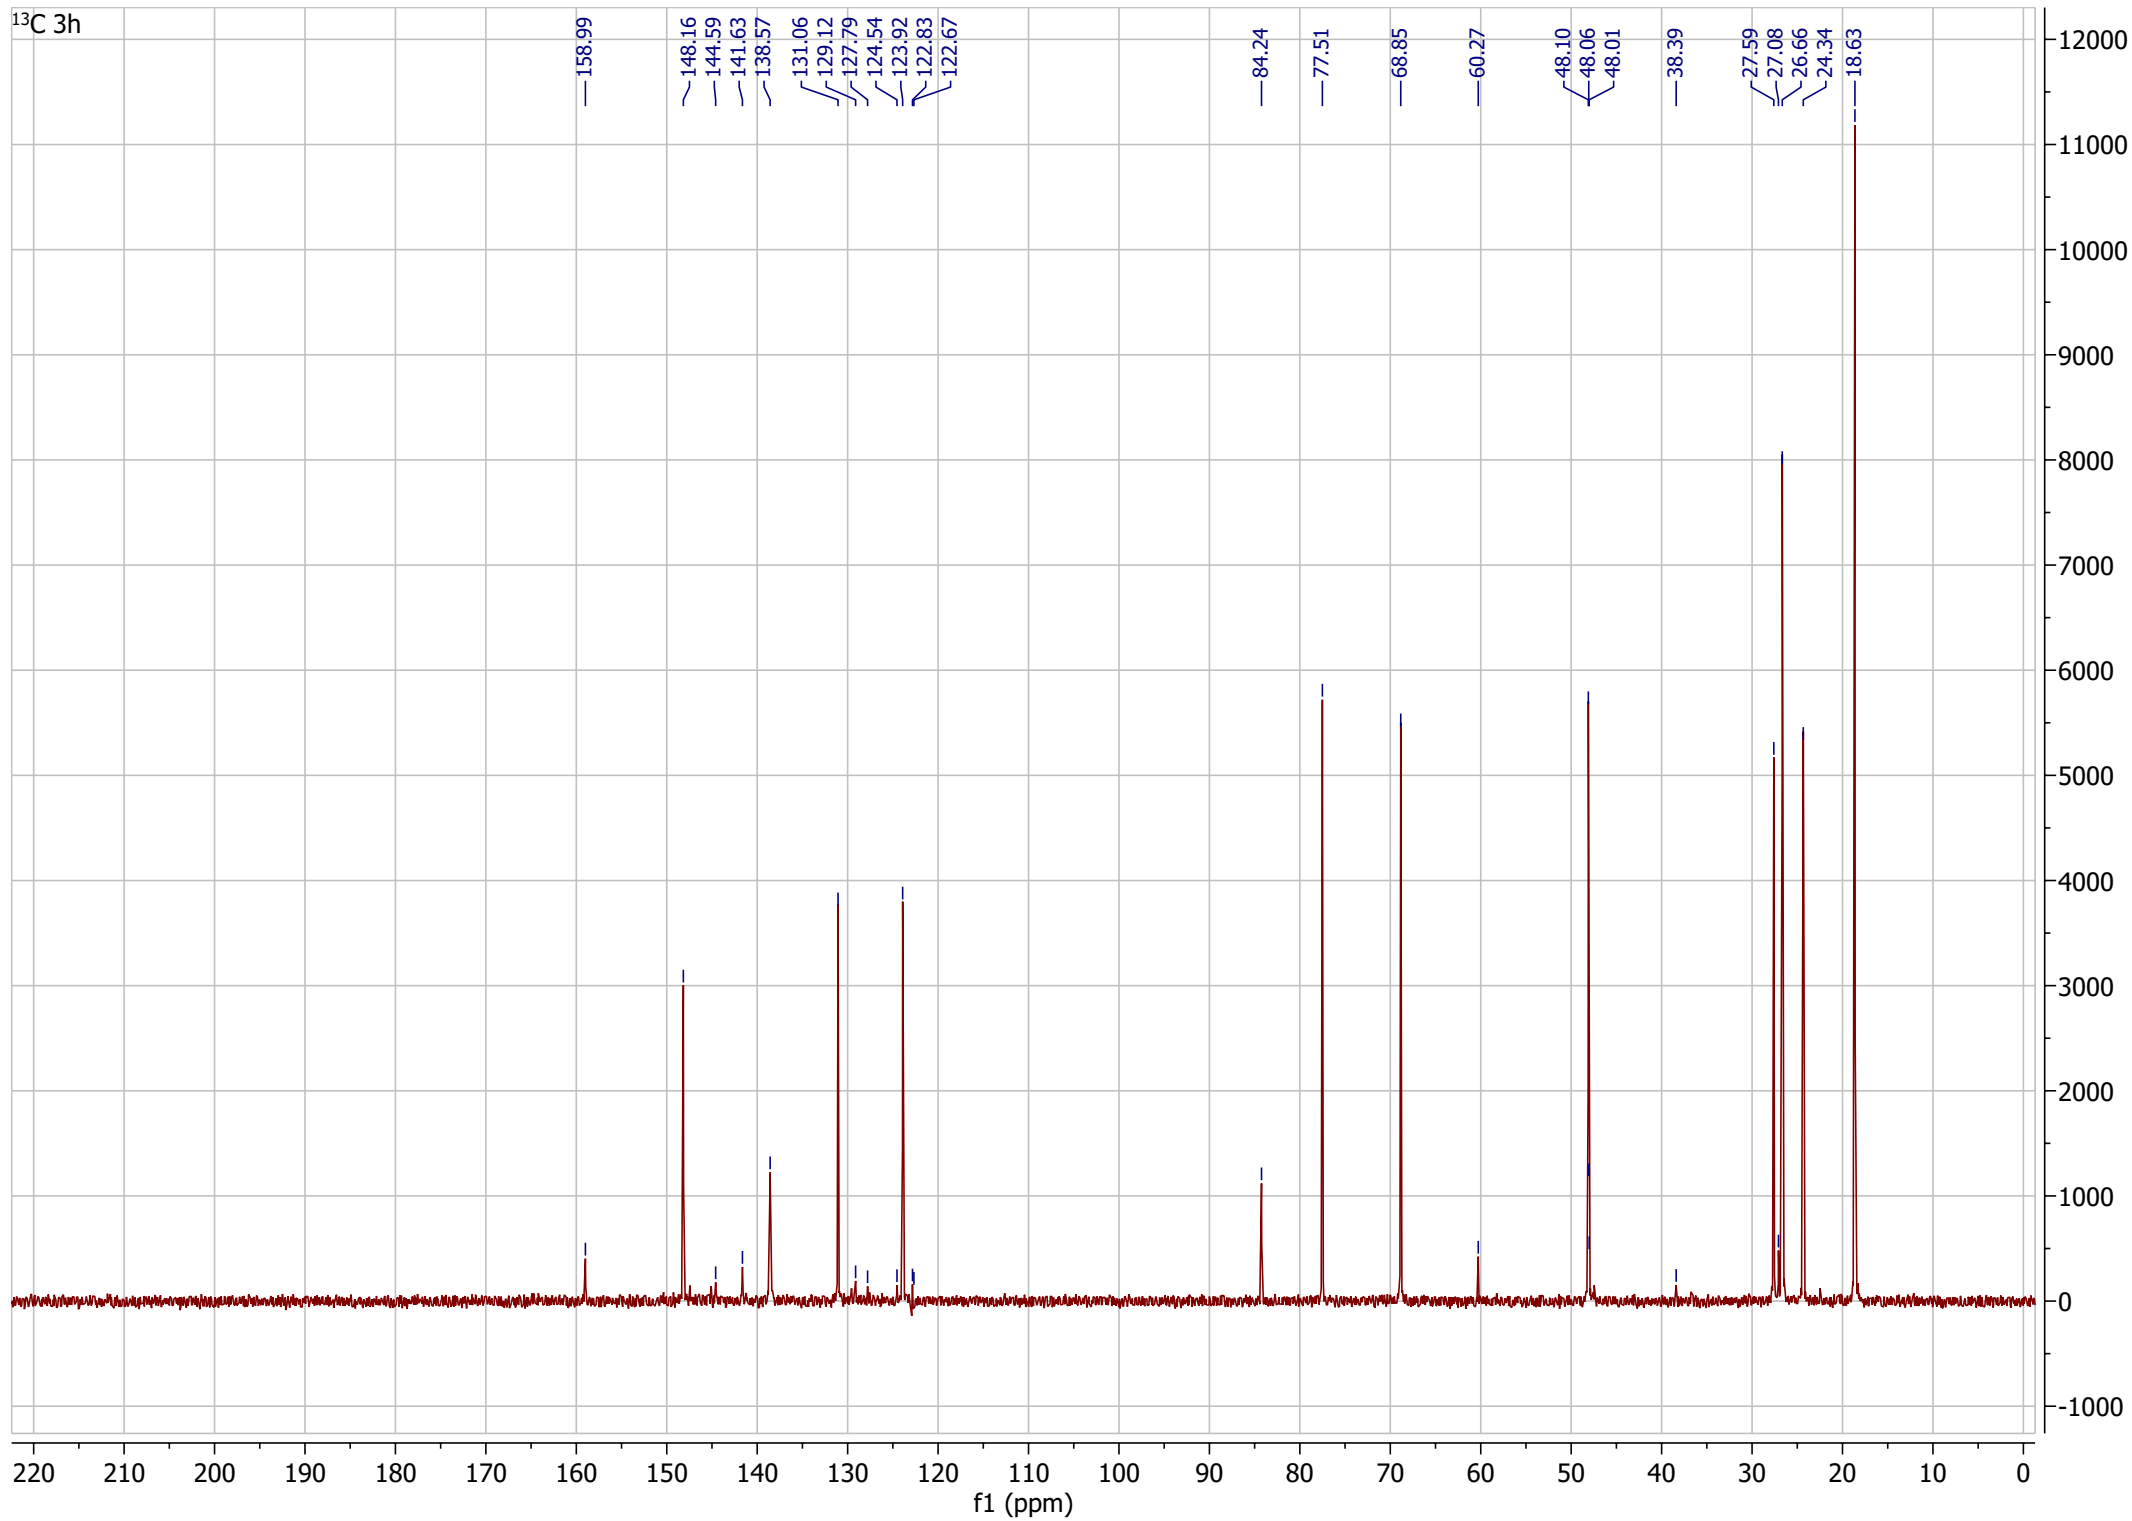

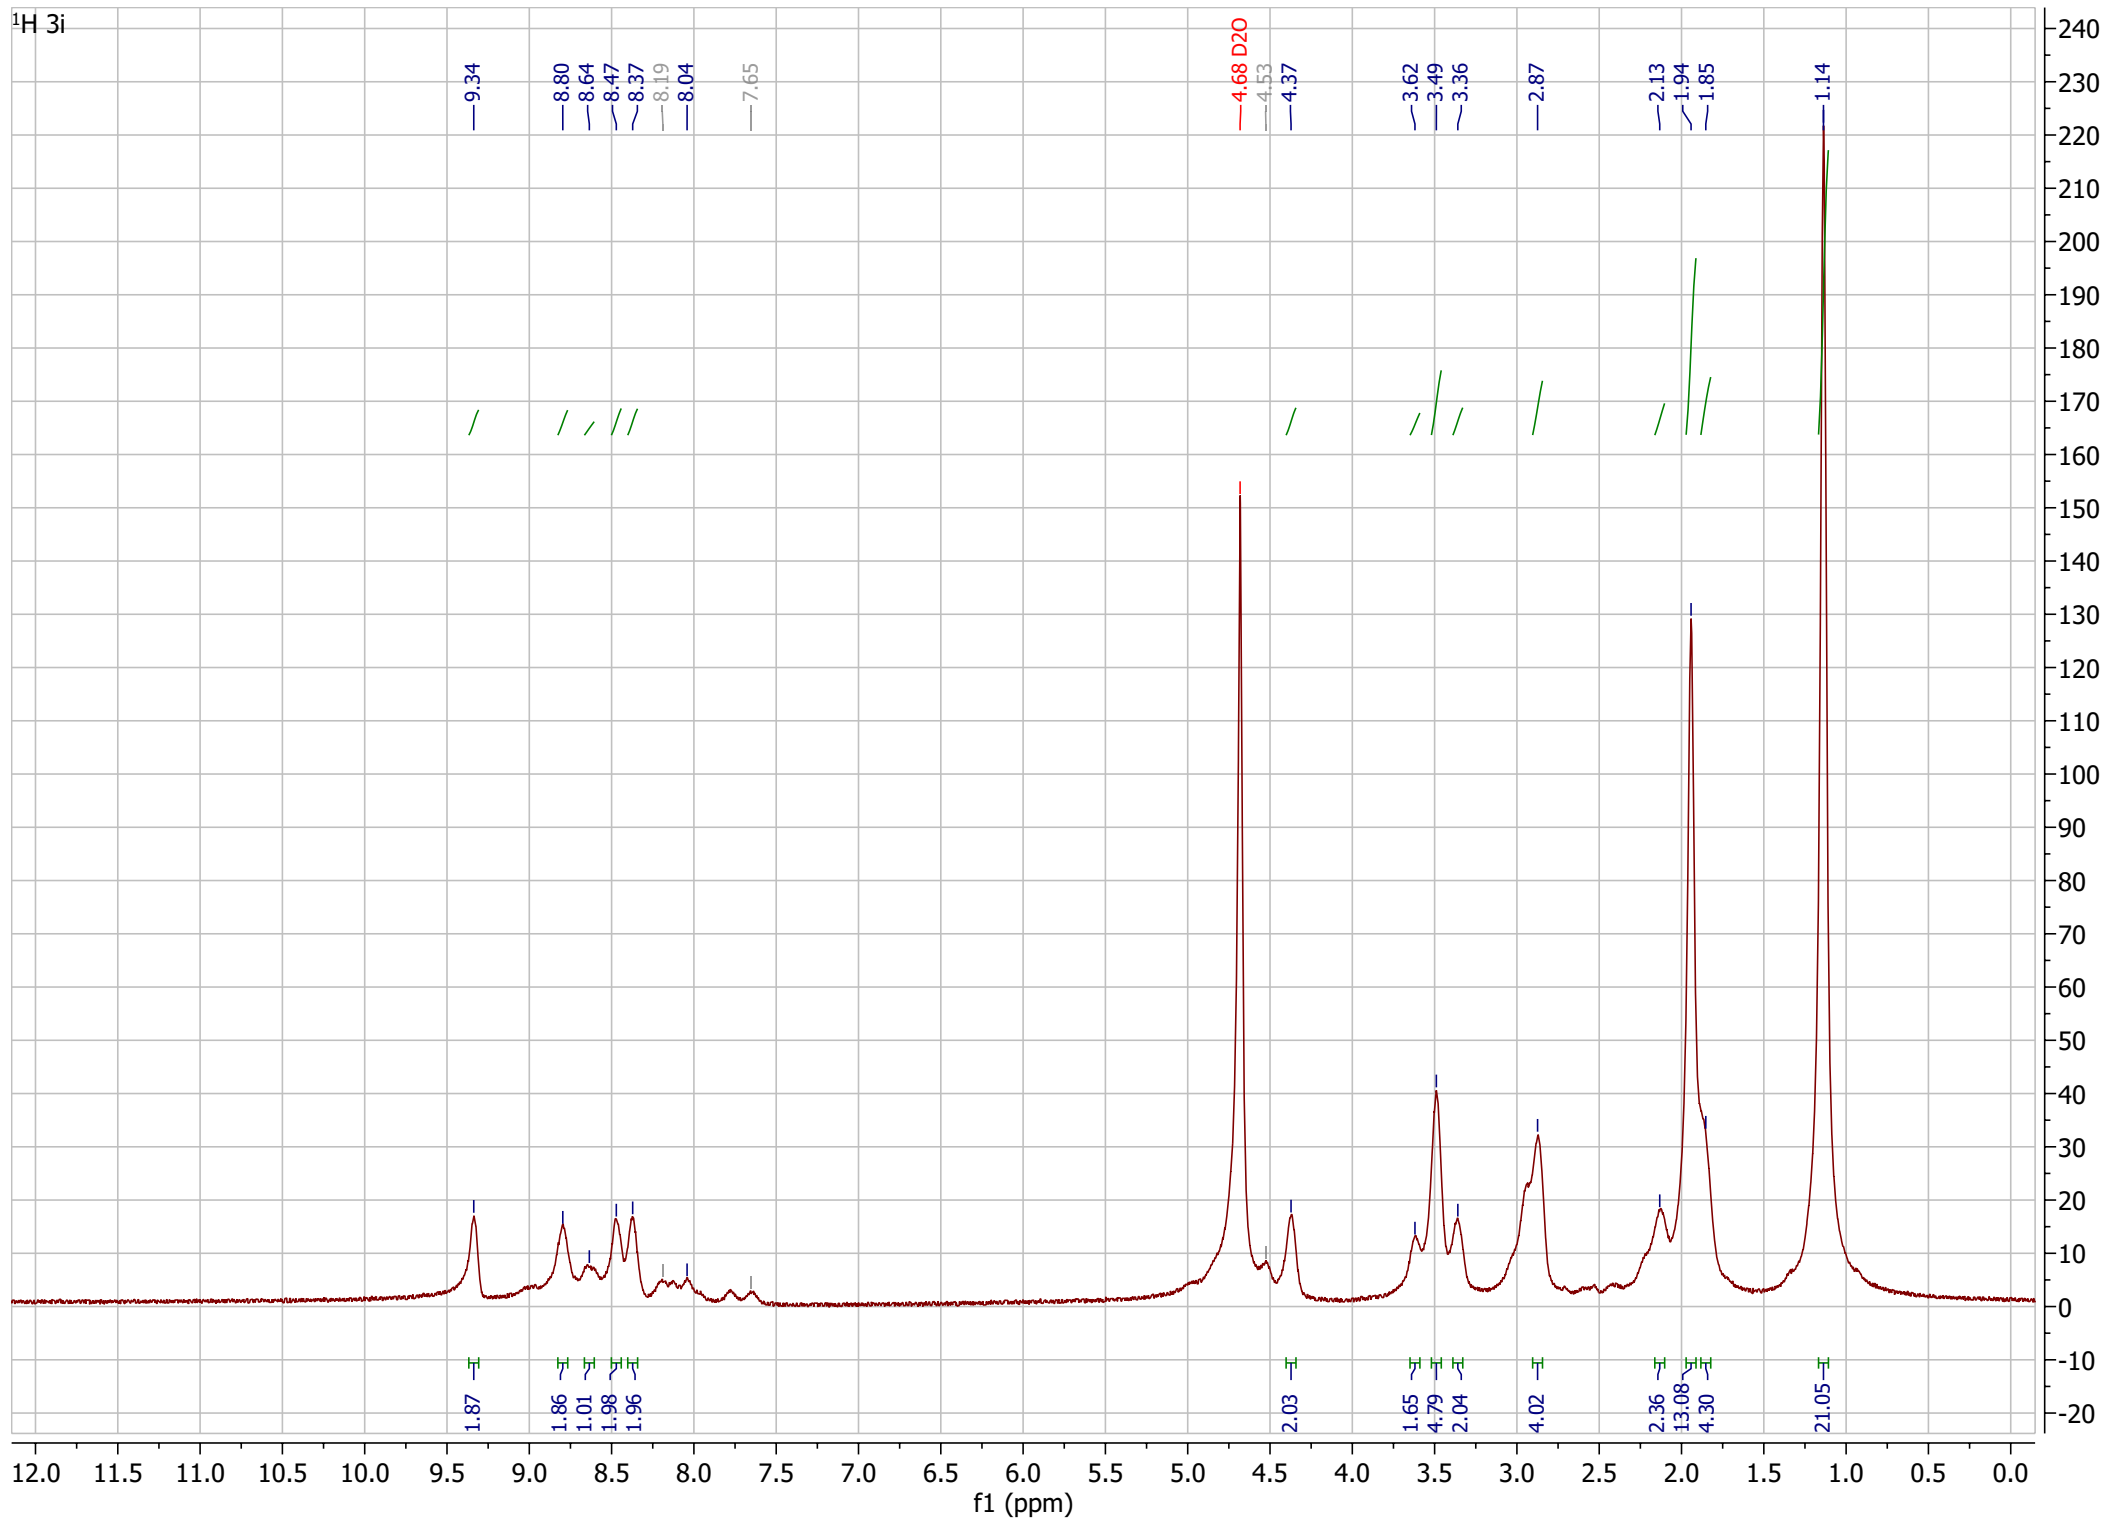

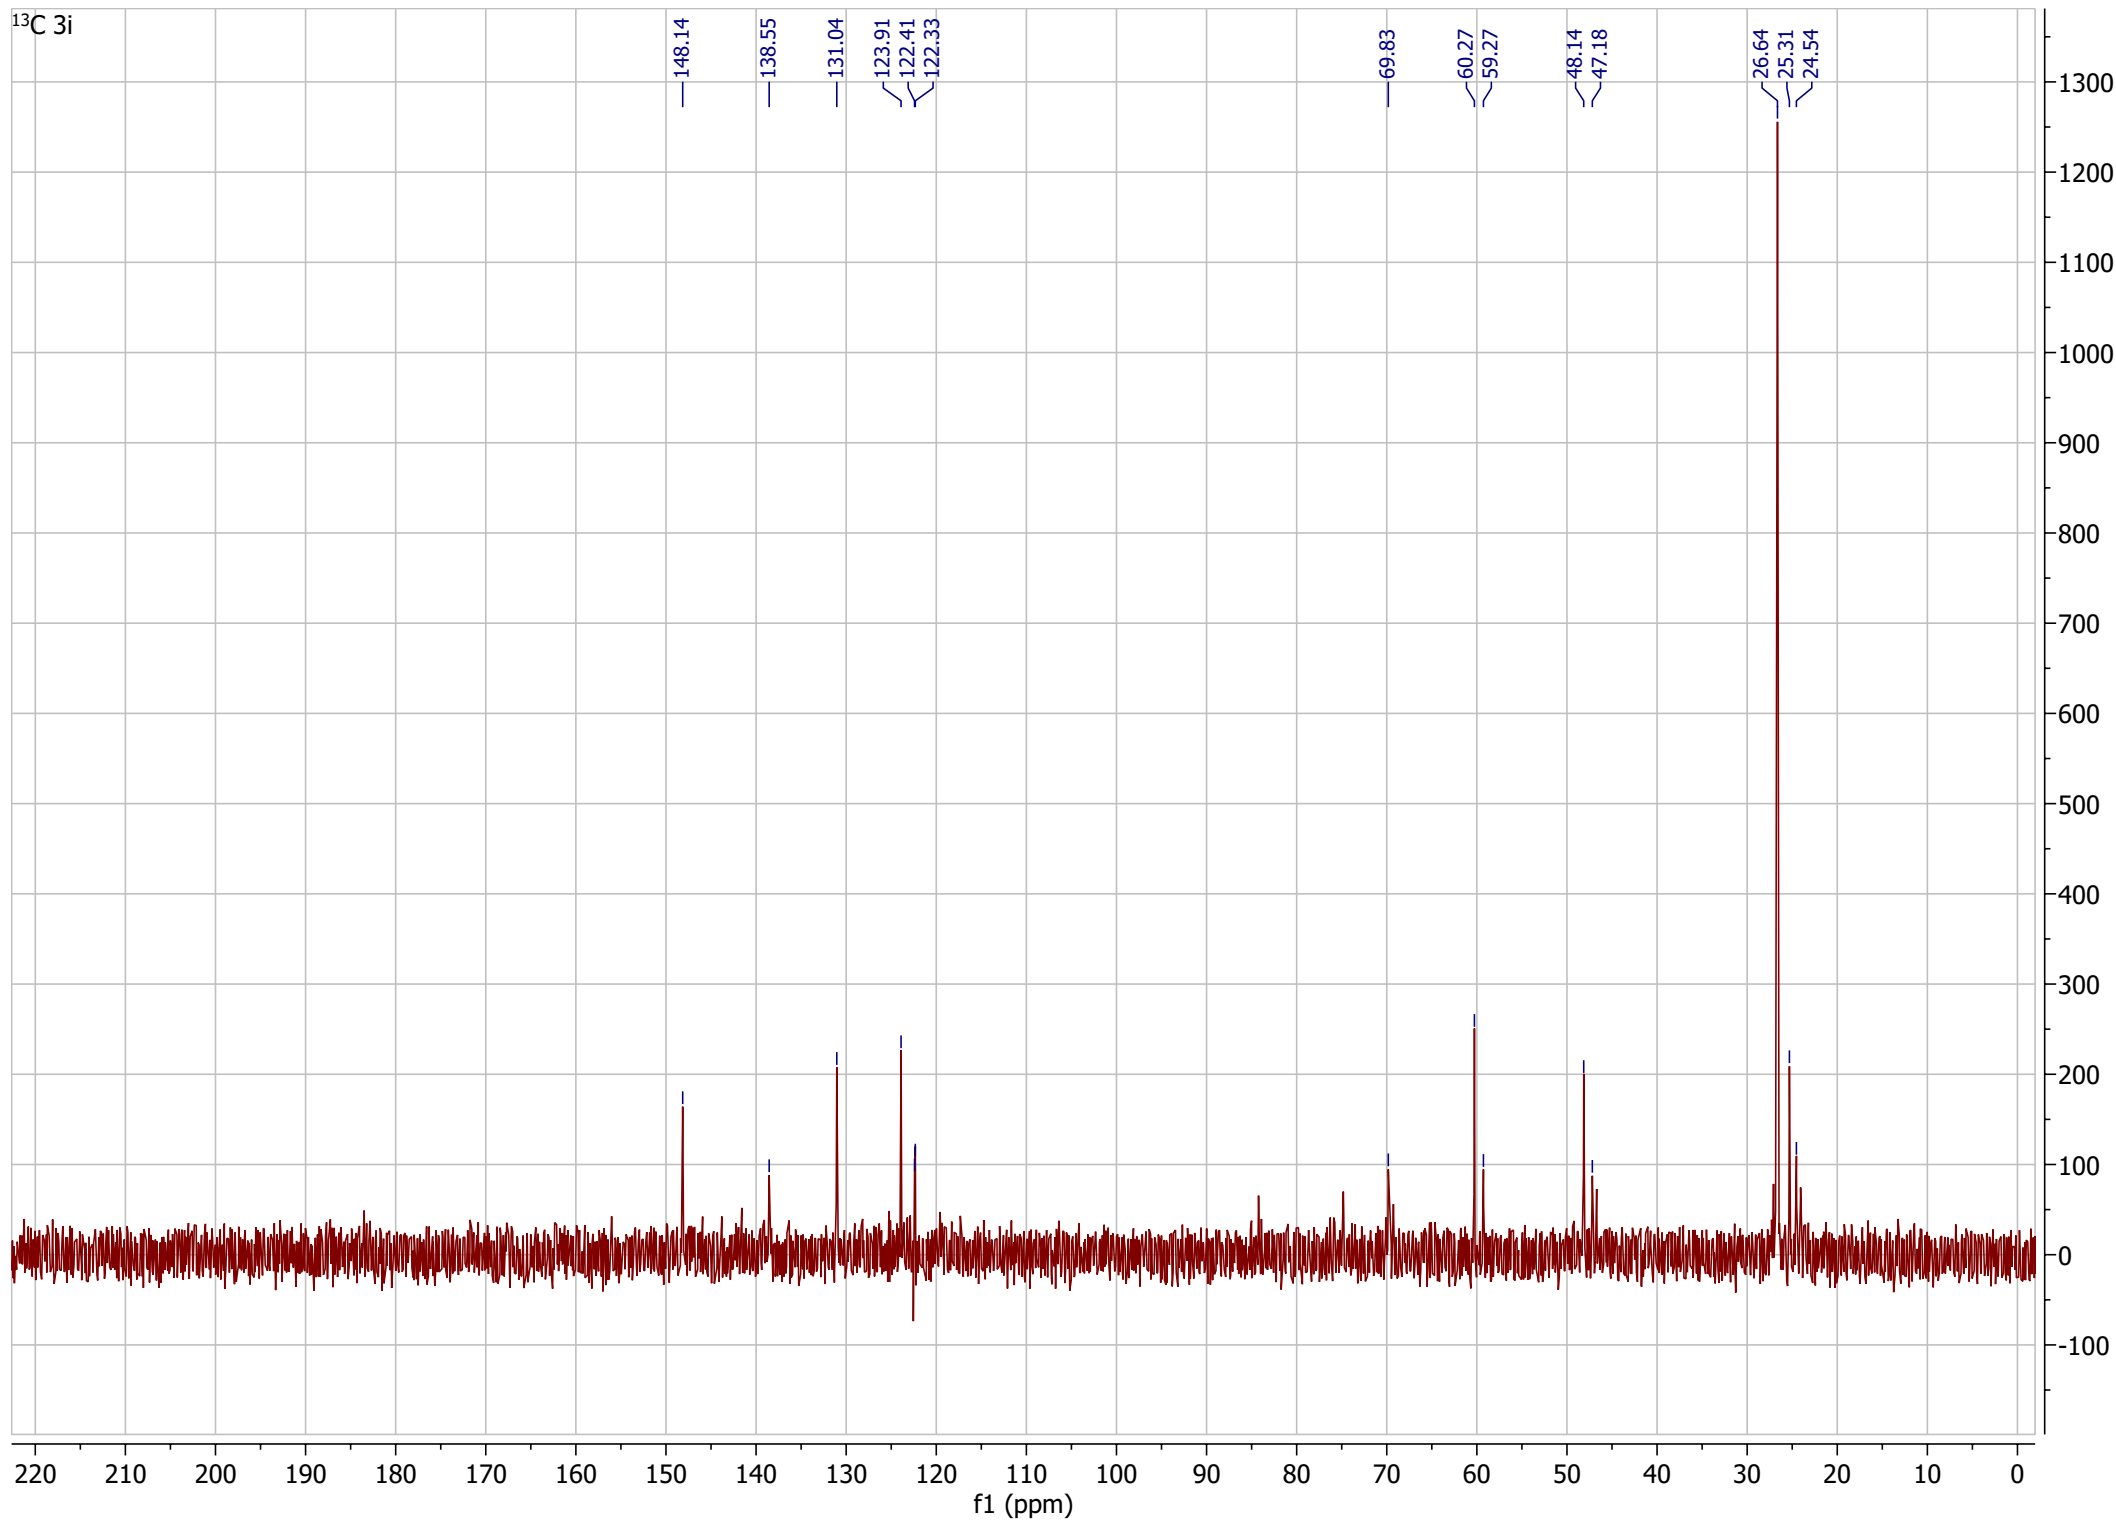



<sup>1</sup>H 3j

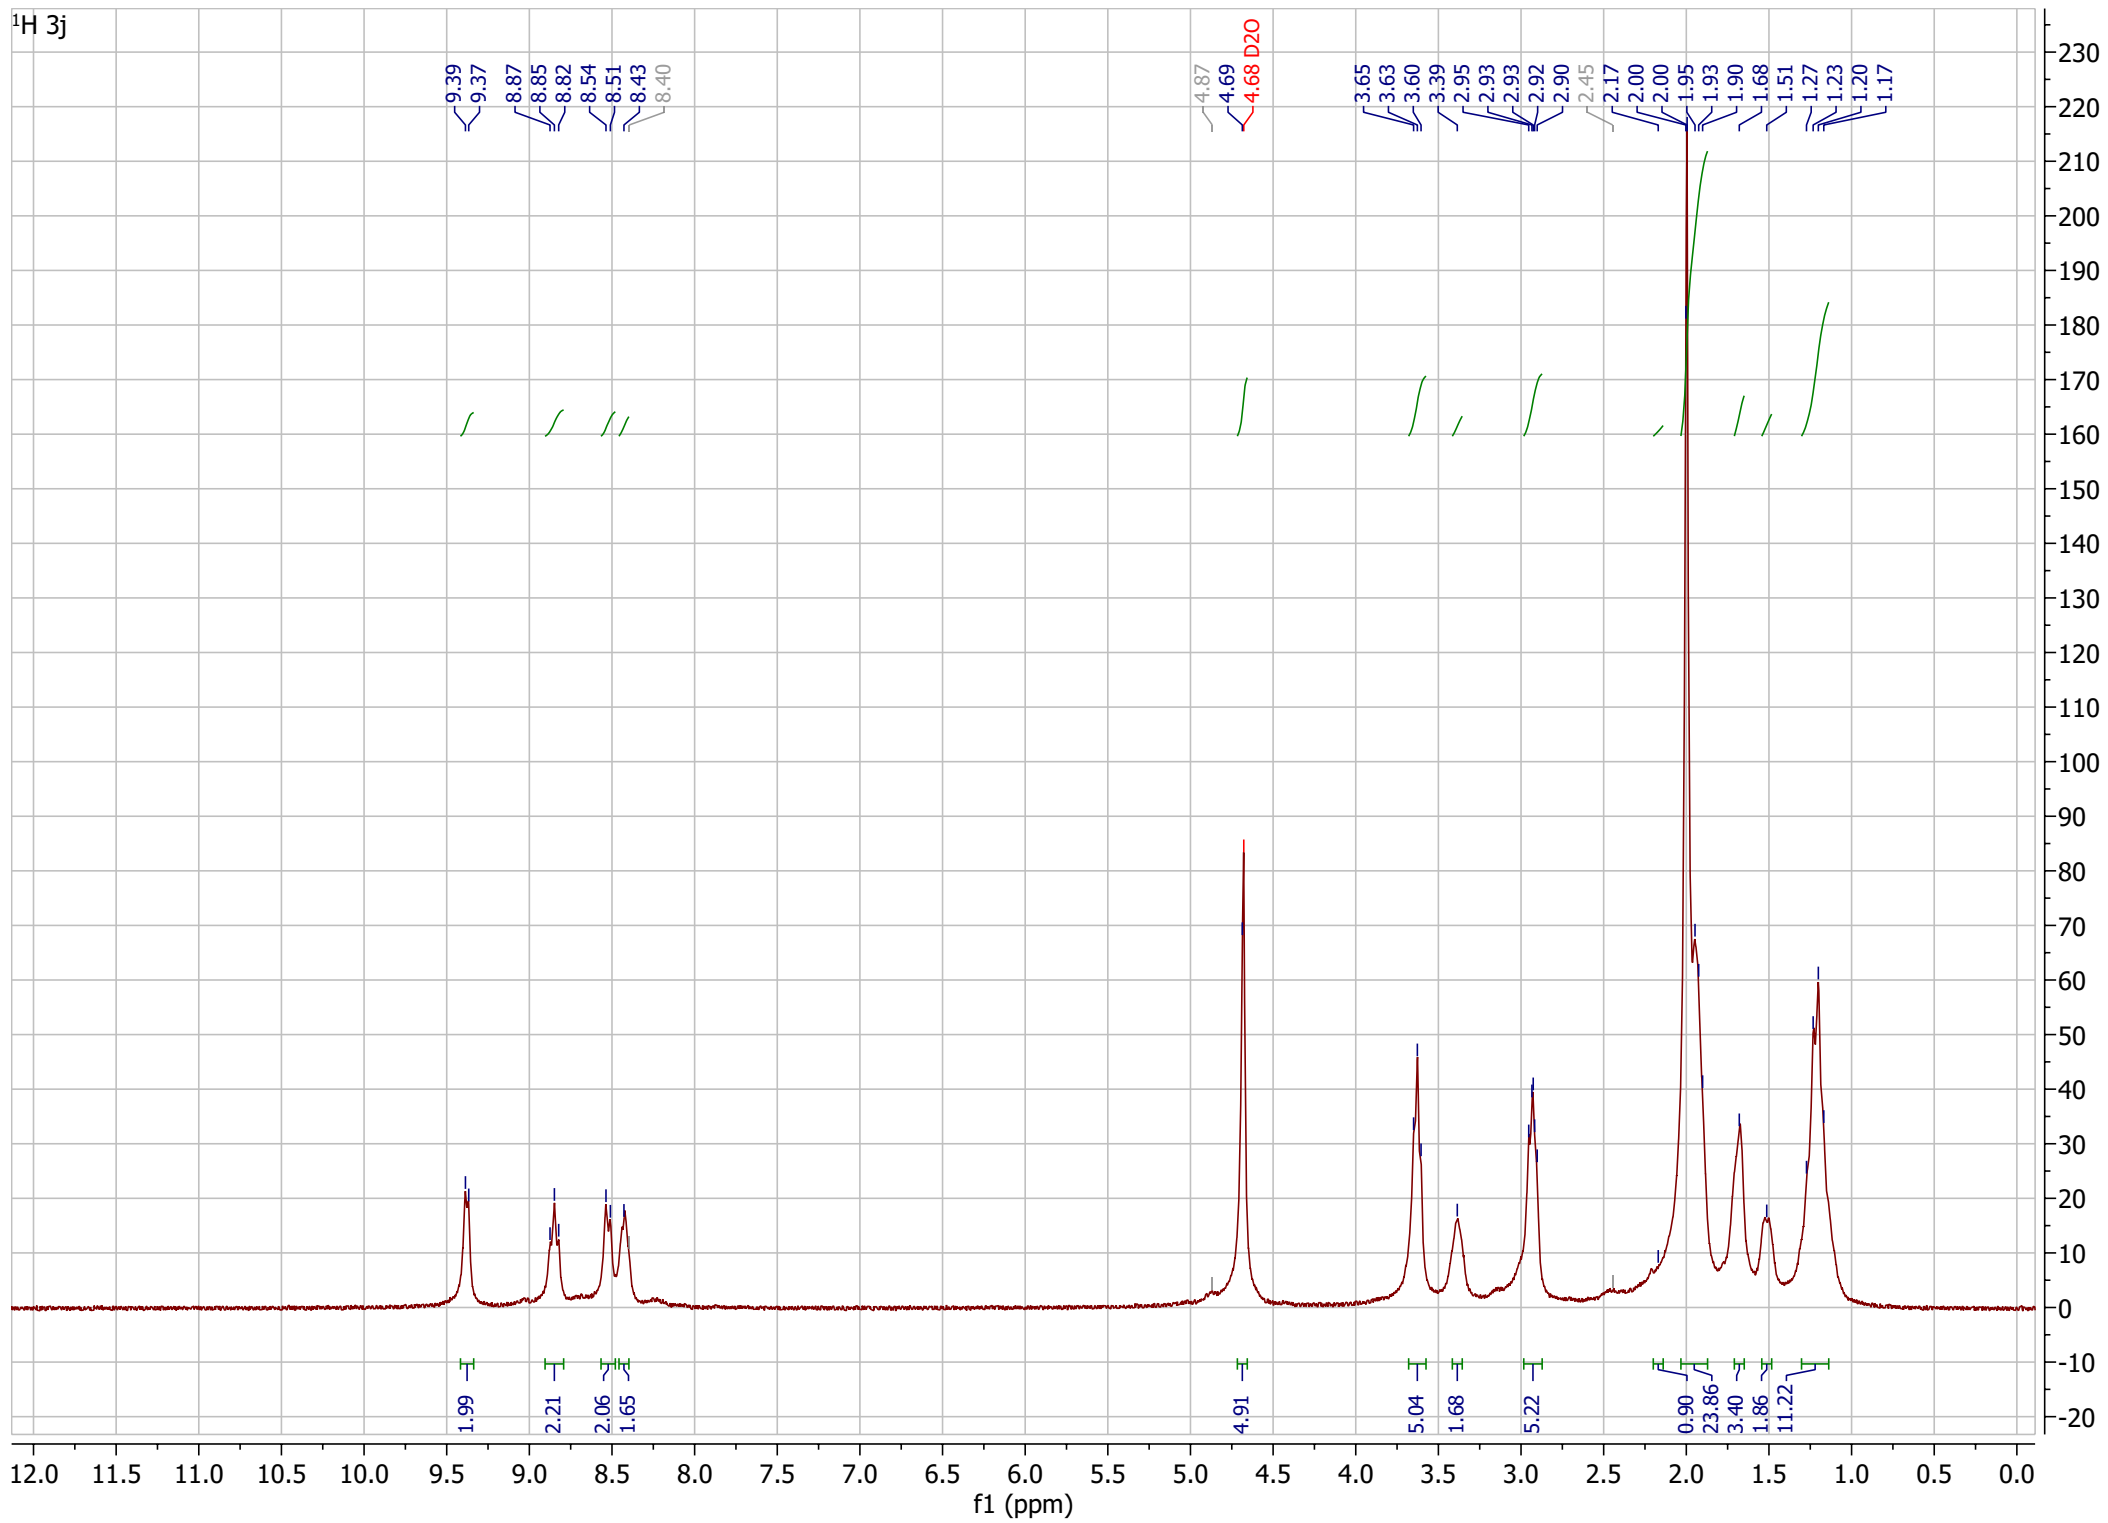

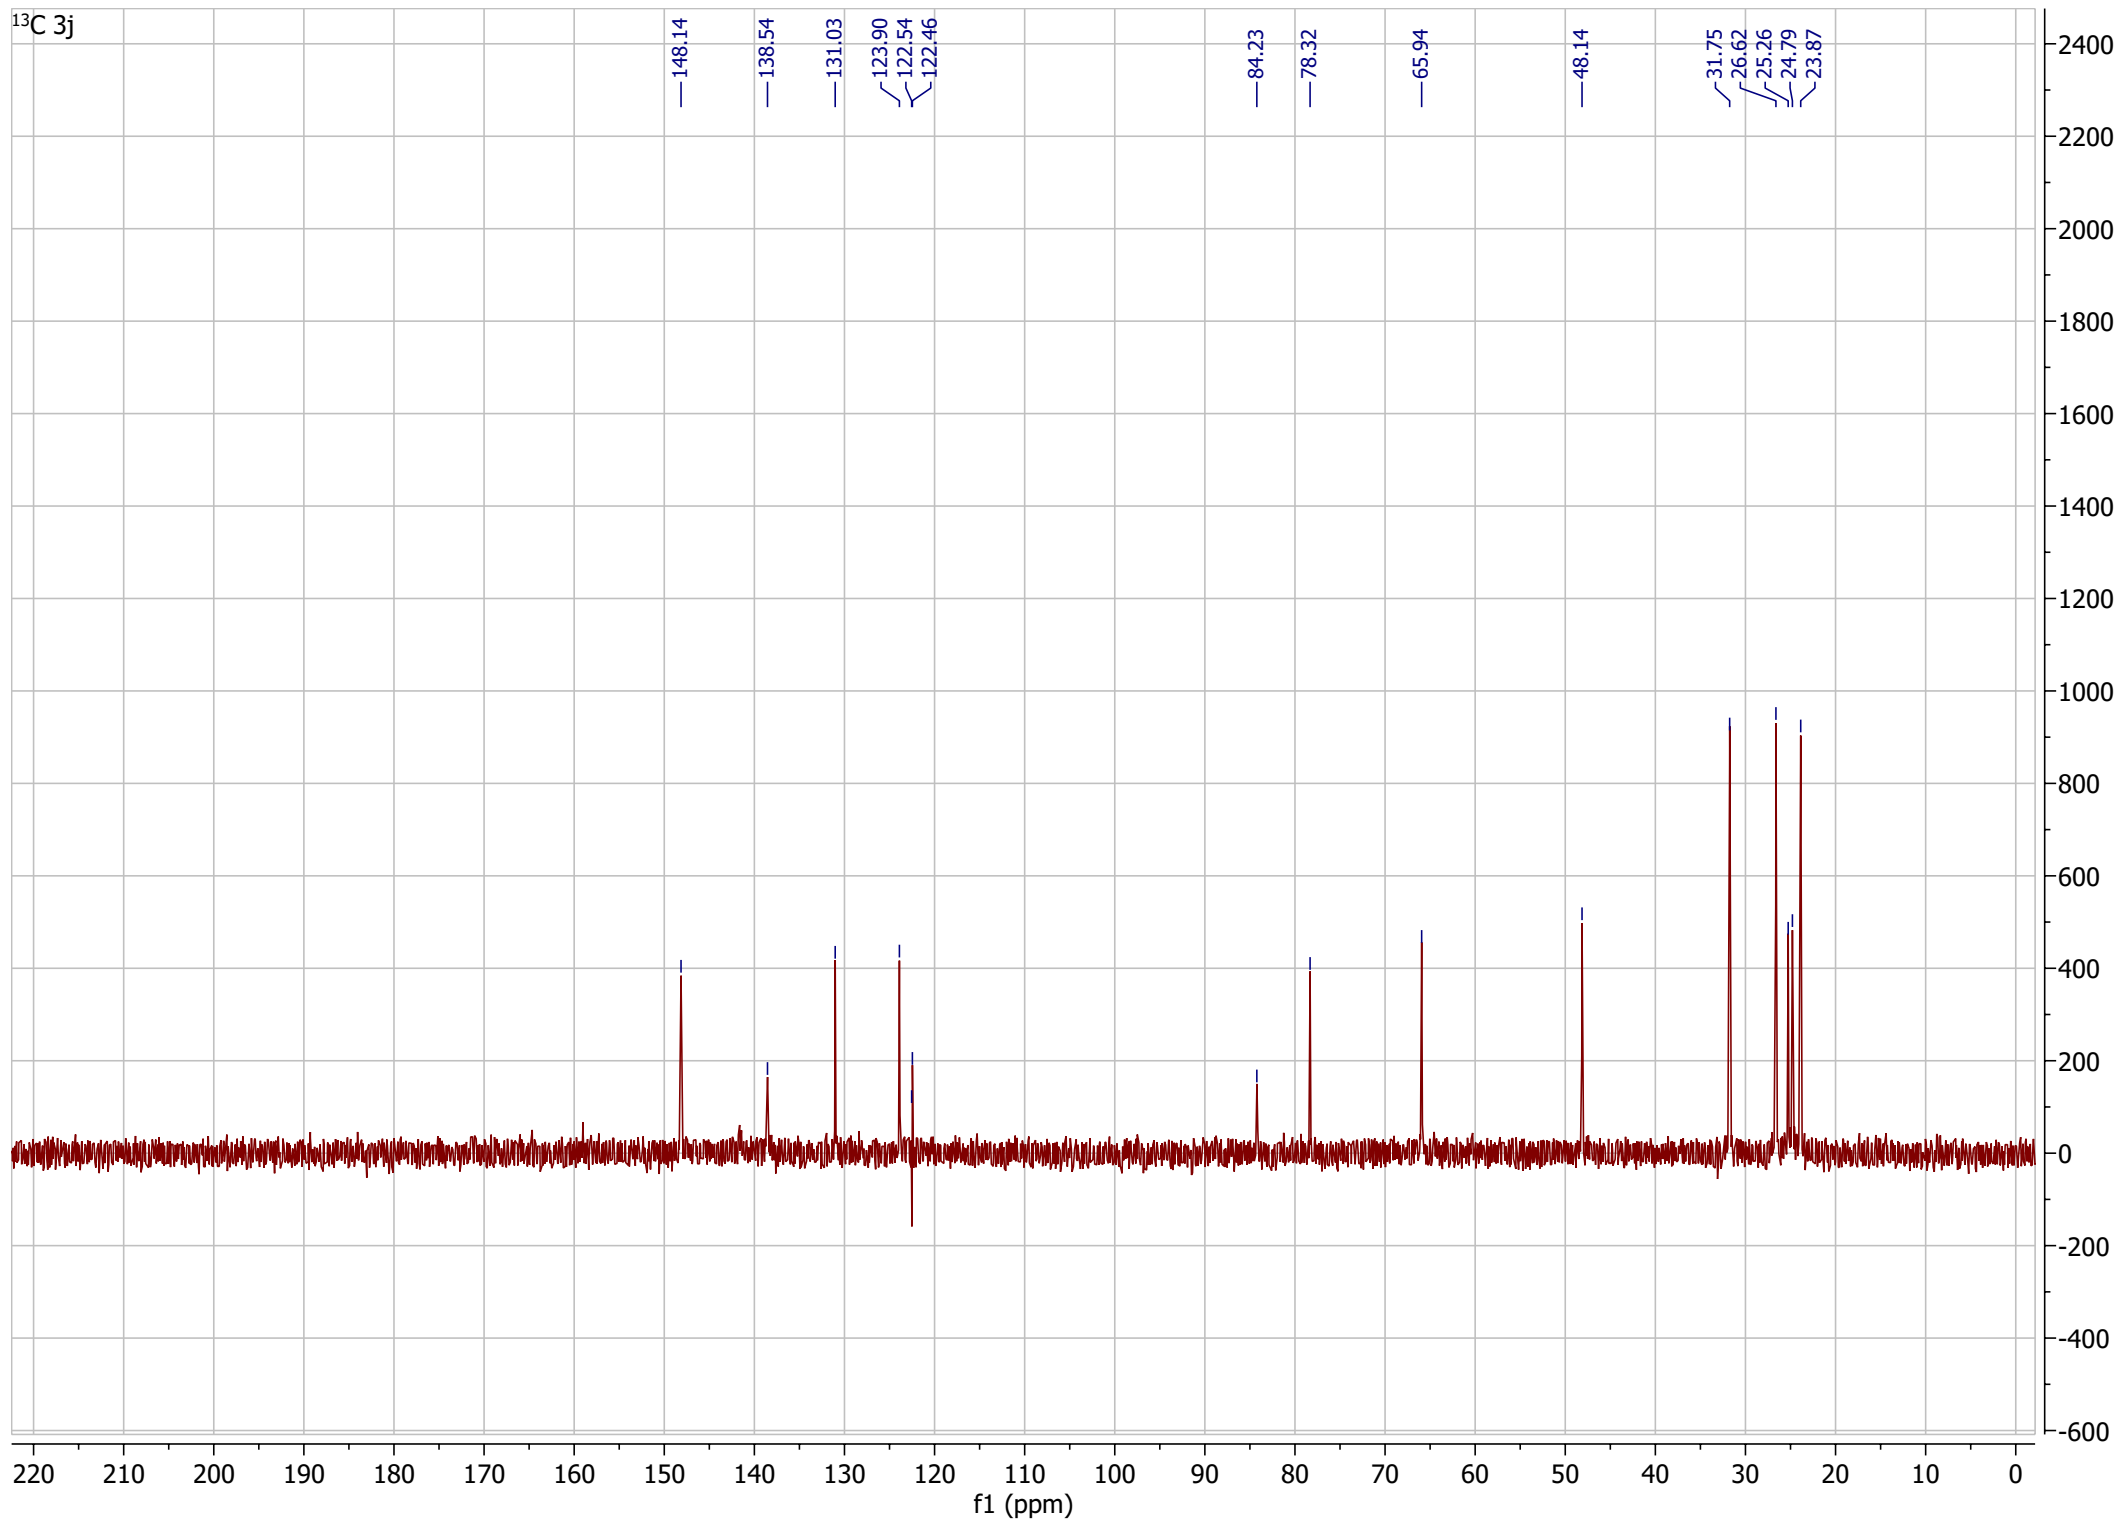

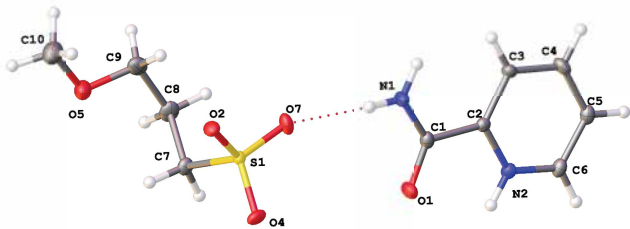

## checkCIF/PLATON report

Structure factors have been supplied for datablock(s) 1622

THIS REPORT IS FOR GUIDANCE ONLY. IF USED AS PART OF A REVIEW PROCEDURE FOR PUBLICATION, IT SHOULD NOT REPLACE THE EXPERTISE OF AN EXPERIENCED CRYSTALLOGRAPHIC REFEREE.

No syntax errors found.      CIF dictionary      Interpreting this report

### Datablock: 1622

---

|                        |                        |                        |                |
|------------------------|------------------------|------------------------|----------------|
| Bond precision:        | C-C = 0.0060 Å         | Wavelength=0.71073     |                |
| Cell:                  | a=9.9079 (5)           | b=12.6799 (6)          | c=19.8194 (10) |
|                        | alpha=90               | beta=92.227 (3)        | gamma=90       |
| Temperature:           | 100 K                  |                        |                |
|                        | Calculated             | Reported               |                |
| Volume                 | 2488.1 (2)             | 2488.1 (2)             |                |
| Space group            | P 21                   | P 1 21 1               |                |
| Hall group             | P 2yb                  | P 2yb                  |                |
| Moiety formula         | C4 H9 O4 S, C6 H7 N2 O | C4 H9 O4 S, C6 H7 N2 O |                |
| Sum formula            | C10 H16 N2 O5 S        | C10 H16 N2 O5 S        |                |
| Mr                     | 276.31                 | 276.31                 |                |
| Dx, g cm <sup>-3</sup> | 1.475                  | 1.475                  |                |
| Z                      | 8                      | 8                      |                |
| Mu (mm <sup>-1</sup> ) | 0.276                  | 0.276                  |                |
| F000                   | 1168.0                 | 1168.0                 |                |
| F000'                  | 1169.60                |                        |                |
| h, k, lmax             | 13, 16, 26             | 13, 16, 26             |                |
| Nref                   | 11848 [ 6190]          | 29400                  |                |
| Tmin, Tmax             | 0.977, 0.989           | 0.498, 0.746           |                |
| Tmin'                  | 0.962                  |                        |                |

Correction method= # Reported T Limits: Tmin=0.498 Tmax=0.746  
AbsCorr = MULTI-SCAN

Data completeness= 4.75/2.48      Theta(max)= 27.875

|                                 |                   |
|---------------------------------|-------------------|
| R(reflections)= 0.0572 ( 27603) | wR2(reflections)= |
| S = 1.055                       | 0.1531 ( 29400)   |
| Npar= 654                       |                   |

---

The following ALERTS were generated. Each ALERT has the format

**test-name\_ALERT\_alert-type\_alert-level.**

Click on the hyperlinks for more details of the test.

---

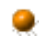

#### Alert level B

PLAT097\_ALERT\_2\_B Large Reported Max. (Positive) Residual Density 1.72 eA-3

---

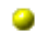

#### Alert level C

DIFMX02\_ALERT\_1\_C The maximum difference density is > 0.1\*ZMAX\*0.75

The relevant atom site should be identified.

PLAT094\_ALERT\_2\_C Ratio of Maximum / Minimum Residual Density .... 2.30 Report

PLAT340\_ALERT\_3\_C Low Bond Precision on C-C Bonds ..... 0.00604 Ang.

PLAT790\_ALERT\_4\_C Centre of Gravity not Within Unit Cell: Resd. # 1 Note

C4 H9 O4 S

PLAT911\_ALERT\_3\_C Missing FCF Refl Between Thmin & Sth/L= 0.600 33 Report

---

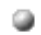

#### Alert level G

PLAT007\_ALERT\_5\_G Number of Unrefined Donor-H Atoms ..... 12 Report

PLAT033\_ALERT\_4\_G Flack x Value Deviates > 3.0 \* sigma from Zero . 0.114 Note

PLAT072\_ALERT\_2\_G SHELXL First Parameter in WGHT Unusually Large 0.11 Report

PLAT432\_ALERT\_2\_G Short Inter X...Y Contact O1 ..C6A . 2.98 Ang.

x,y,z = 1\_555 Check

PLAT432\_ALERT\_2\_G Short Inter X...Y Contact O1A ..C6 . 2.98 Ang.

x,1+y,z = 1\_565 Check

PLAT432\_ALERT\_2\_G Short Inter X...Y Contact O1B ..C6C . 2.97 Ang.

x,y,z = 1\_555 Check

PLAT432\_ALERT\_2\_G Short Inter X...Y Contact O1C ..C6B . 2.98 Ang.

x,-1+y,z = 1\_545 Check

PLAT432\_ALERT\_2\_G Short Inter X...Y Contact O4 ..C2 . 2.83 Ang.

-x,1/2+y,1-z = 2\_556 Check

PLAT720\_ALERT\_4\_G Number of Unusual/Non-Standard Labels ..... 24 Note

PLAT870\_ALERT\_4\_G ALERTS Related to Twinning Effects Suppressed .. ! Info

PLAT910\_ALERT\_3\_G Missing # of FCF Reflection(s) Below Theta(Min). 1 Note

PLAT912\_ALERT\_4\_G Missing # of FCF Reflections Above Sth/L= 0.600 2 Note

PLAT913\_ALERT\_3\_G Missing # of Very Strong Reflections in FCF .... 1 Note

PLAT933\_ALERT\_2\_G Number of HKL-OMIT Records in Embedded .res File 13 Note

PLAT941\_ALERT\_3\_G Average HKL Measurement Multiplicity ..... 4.8 Low

PLAT992\_ALERT\_5\_G Repd & Actual \_reflns\_number\_gt Values Differ by 9 Check

---

0 **ALERT level A** = Most likely a serious problem - resolve or explain

1 **ALERT level B** = A potentially serious problem, consider carefully

5 **ALERT level C** = Check. Ensure it is not caused by an omission or oversight

16 **ALERT level G** = General information/check it is not something unexpected

1 ALERT type 1 CIF construction/syntax error, inconsistent or missing data

9 ALERT type 2 Indicator that the structure model may be wrong or deficient

5 ALERT type 3 Indicator that the structure quality may be low

5 ALERT type 4 Improvement, methodology, query or suggestion

2 ALERT type 5 Informative message, check

---

It is advisable to attempt to resolve as many as possible of the alerts in all categories. Often the minor alerts point to easily fixed oversights, errors and omissions in your CIF or refinement strategy, so attention to these fine details can be worthwhile. In order to resolve some of the more serious problems it may be necessary to carry out additional measurements or structure refinements. However, the purpose of your study may justify the reported deviations and the more serious of these should normally be commented upon in the discussion or experimental section of a paper or in the "special\_details" fields of the CIF. checkCIF was carefully designed to identify outliers and unusual parameters, but every test has its limitations and alerts that are not important in a particular case may appear. Conversely, the absence of alerts does not guarantee there are no aspects of the results needing attention. It is up to the individual to critically assess their own results and, if necessary, seek expert advice.

### **Publication of your CIF in IUCr journals**

A basic structural check has been run on your CIF. These basic checks will be run on all CIFs submitted for publication in IUCr journals (*Acta Crystallographica*, *Journal of Applied Crystallography*, *Journal of Synchrotron Radiation*); however, if you intend to submit to *Acta Crystallographica Section C* or *E* or *IUCrData*, you should make sure that full publication checks are run on the final version of your CIF prior to submission.

### **Publication of your CIF in other journals**

Please refer to the *Notes for Authors* of the relevant journal for any special instructions relating to CIF submission.

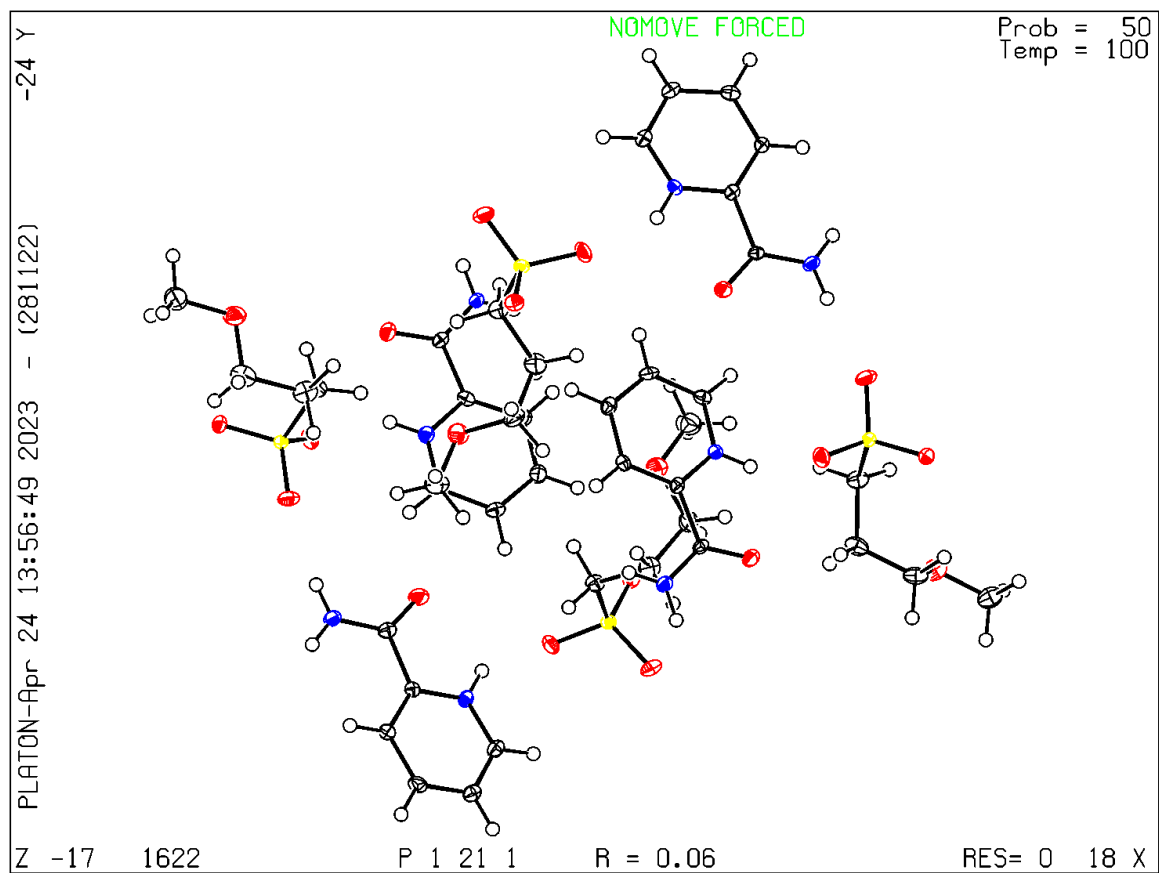

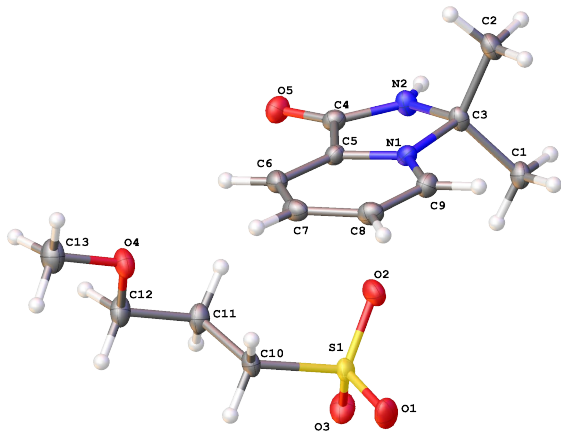



## checkCIF/PLATON report

Structure factors have been supplied for datablock(s) 2622

THIS REPORT IS FOR GUIDANCE ONLY. IF USED AS PART OF A REVIEW PROCEDURE FOR PUBLICATION, IT SHOULD NOT REPLACE THE EXPERTISE OF AN EXPERIENCED CRYSTALLOGRAPHIC REFEREE.

No syntax errors found.      CIF dictionary      Interpreting this report

### Datablock: 2622

---

|                        |                         |                               |             |
|------------------------|-------------------------|-------------------------------|-------------|
| Bond precision:        | C-C = 0.0052 A          | Wavelength=0.71073            |             |
| Cell:                  | a=12.422(2)             | b=8.7237(15)                  | c=14.699(2) |
|                        | alpha=90                | beta=109.106(6)               | gamma=90    |
| Temperature:           | 100 K                   |                               |             |
|                        | Calculated              | Reported                      |             |
| Volume                 | 1505.1(4)               | 1505.1(4)                     |             |
| Space group            | P 21/n                  | P 1 21/n 1                    |             |
| Hall group             | -P 2yn                  | -P 2yn                        |             |
| Moiety formula         | C9 H11 N2 O, C4 H9 O4 S | 2(C4 H9 O4 S), 2(C9 H11 N2 O) |             |
| Sum formula            | C13 H20 N2 O5 S         | C26 H40 N4 O10 S2             |             |
| Mr                     | 316.37                  | 632.74                        |             |
| Dx, g cm <sup>-3</sup> | 1.396                   | 1.396                         |             |
| Z                      | 4                       | 2                             |             |
| Mu (mm <sup>-1</sup> ) | 0.238                   | 0.238                         |             |
| F000                   | 672.0                   | 672.0                         |             |
| F000'                  | 672.83                  |                               |             |
| h,k,lmax               | 16,11,19                | 16,11,19                      |             |
| Nref                   | 3584                    | 3544                          |             |
| Tmin,Tmax              | 0.986,0.993             | 0.595,0.746                   |             |
| Tmin'                  | 0.976                   |                               |             |

Correction method= # Reported T Limits: Tmin=0.595 Tmax=0.746  
AbsCorr = MULTI-SCAN

Data completeness= 0.989      Theta(max)= 27.876

|                               |                                 |
|-------------------------------|---------------------------------|
| R(reflections)= 0.0728( 3030) | wR2(reflections)= 0.1902( 3544) |
| S = 1.115                     | Npar= 193                       |

---

The following ALERTS were generated. Each ALERT has the format

**test-name\_ALERT\_alert-type\_alert-level.**

Click on the hyperlinks for more details of the test.

---

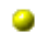

### Alert level C

|                   |                                                  |              |
|-------------------|--------------------------------------------------|--------------|
| PLAT042_ALERT_1_C | Calc. and Reported MoietyFormula Strings Differ  | Please Check |
| PLAT340_ALERT_3_C | Low Bond Precision on C-C Bonds .....            | 0.00522 Ang. |
| PLAT906_ALERT_3_C | Large K Value in the Analysis of Variance .....  | 6.736 Check  |
| PLAT906_ALERT_3_C | Large K Value in the Analysis of Variance .....  | 2.104 Check  |
| PLAT911_ALERT_3_C | Missing FCF Refl Between Thmin & STh/L= 0.600    | 34 Report    |
| PLAT913_ALERT_3_C | Missing # of Very Strong Reflections in FCF .... | 5 Note       |

---

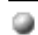

### Alert level G

|                   |                                                  |              |
|-------------------|--------------------------------------------------|--------------|
| PLAT007_ALERT_5_G | Number of Unrefined Donor-H Atoms .....          | 1 Report     |
| PLAT019_ALERT_1_G | _diffn_measured_fraction_theta_full/*_max < 1.0  | 0.998 Report |
| PLAT045_ALERT_1_G | Calculated and Reported Z Differ by a Factor ... | 2 Check      |
| PLAT083_ALERT_2_G | SHELXL Second Parameter in WGHT Unusually Large  | 6.72 Why ?   |
| PLAT432_ALERT_2_G | Short Inter X...Y Contact O2 ..C5 .              | 2.96 Ang.    |
|                   | x,y,z = 1_555                                    | Check        |
| PLAT432_ALERT_2_G | Short Inter X...Y Contact O5 ..C5 .              | 3.01 Ang.    |
|                   | 2-x,1-y,1-z = 3_766                              | Check        |
| PLAT910_ALERT_3_G | Missing # of FCF Reflection(s) Below Theta(Min). | 1 Note       |
| PLAT912_ALERT_4_G | Missing # of FCF Reflections Above STh/L= 0.600  | 6 Note       |
| PLAT933_ALERT_2_G | Number of HKL-OMIT Records in Embedded .res File | 4 Note       |
| PLAT941_ALERT_3_G | Average HKL Measurement Multiplicity .....       | 3.8 Low      |
| PLAT978_ALERT_2_G | Number C-C Bonds with Positive Residual Density. | 2 Info       |

---

- 0 **ALERT level A** = Most likely a serious problem - resolve or explain  
0 **ALERT level B** = A potentially serious problem, consider carefully  
6 **ALERT level C** = Check. Ensure it is not caused by an omission or oversight  
11 **ALERT level G** = General information/check it is not something unexpected
- 3 ALERT type 1 CIF construction/syntax error, inconsistent or missing data  
5 ALERT type 2 Indicator that the structure model may be wrong or deficient  
7 ALERT type 3 Indicator that the structure quality may be low  
1 ALERT type 4 Improvement, methodology, query or suggestion  
1 ALERT type 5 Informative message, check
- 
-

It is advisable to attempt to resolve as many as possible of the alerts in all categories. Often the minor alerts point to easily fixed oversights, errors and omissions in your CIF or refinement strategy, so attention to these fine details can be worthwhile. In order to resolve some of the more serious problems it may be necessary to carry out additional measurements or structure refinements. However, the purpose of your study may justify the reported deviations and the more serious of these should normally be commented upon in the discussion or experimental section of a paper or in the "special\_details" fields of the CIF. checkCIF was carefully designed to identify outliers and unusual parameters, but every test has its limitations and alerts that are not important in a particular case may appear. Conversely, the absence of alerts does not guarantee there are no aspects of the results needing attention. It is up to the individual to critically assess their own results and, if necessary, seek expert advice.

### **Publication of your CIF in IUCr journals**

A basic structural check has been run on your CIF. These basic checks will be run on all CIFs submitted for publication in IUCr journals (*Acta Crystallographica*, *Journal of Applied Crystallography*, *Journal of Synchrotron Radiation*); however, if you intend to submit to *Acta Crystallographica Section C* or *E* or *IUCrData*, you should make sure that full publication checks are run on the final version of your CIF prior to submission.

### **Publication of your CIF in other journals**

Please refer to the *Notes for Authors* of the relevant journal for any special instructions relating to CIF submission.

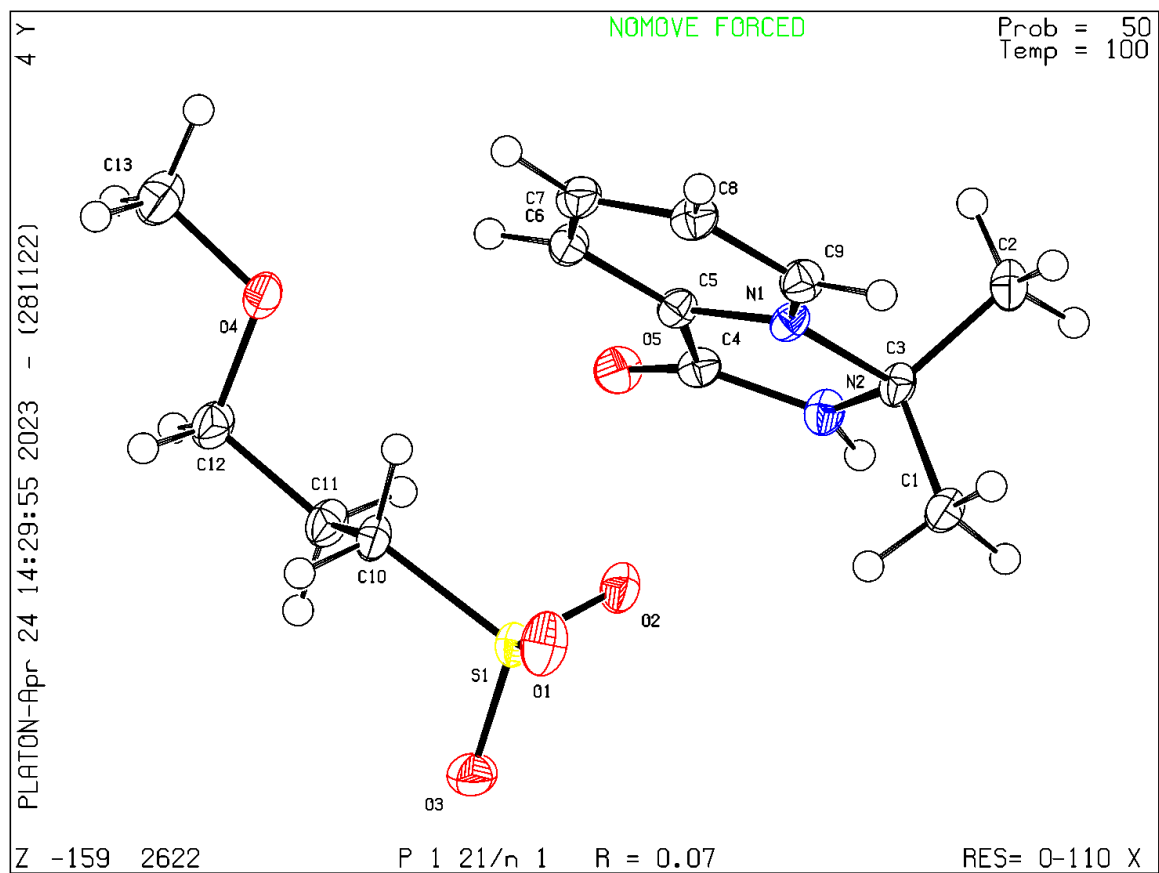

Supplement: s1 [file s1]
